# Supplementary material for: Pyrotinib after trastuzumab-based adjuvant therapy in patients with HER2-positive breast cancer (PERSIST): A multicenter phase II trial
Source: eLife. 2025 Apr 3;13:RP101724. doi: 10.7554/eLife.101724 (PMC11968101; doi:10.7554/eLife.101724)
Supplement: Source data 1. [file elife-101724-data1.xlsx]

## Sheet: Baseline&efficacy
No.	Sex	Age	ECOG-PS score	High Risk Factors after Surgery				Neoadjuvant Treatment	First Dosing Time	Discontinuation date	Cycles	Recurrence Time	Adjuvant Regimens (dual-target/single-target)	Events	IDFS
				T status	Lymph Nodes Metastasis	HR status	Ki-67	Yes/No
1	Female	57	1	T1	1/17	ER(-)/PR(-)	70%+	No	2019-01-13	2019-11-10	10	Not Recurrence	Single Target	Missing	44 months
2	Female	66	0	T1	3/19	ER(-)/PR(-)	70%+	No	2019-01-21	2019-12-23	12	Not Recurrence	Single Target	Missing	43 months
3	Female	33	1	T3	6/18	ER(90%+) PR(50%)	10%+	Yes	2019-02-17	2020-01-25	12	Not Recurrence	Single Target	Missing	43 months
4	Female	43	0	T1	1/13	ER(90%) PR(80%)	~50%	No	2019-04-02	2020-03-03	12	Not Recurrence	Single Target	Missing	41 months
5	Female	52	ND	T2	15/16	ER(-)/PR(-)	70%+	No	2019-04-13	2020-03-17	12	2020-06-27	Single Target	Event	14 months
6	Female	51	0	T2	1/16	ER(-)/PR(<1%+)	0.4	No	2019-04-14	2020-03-24	12	Not Recurrence	Single Target	Missing	41 months
7	Female	43	ND	T1	10/21	ER(70%) PR(3%)	0.5	No	2019-04-16	2019-09-30	6	2019-10-08	Single Target	Event	6 months
8	Female	33	1	T2	15/17	ER(-)/PR(-)	0.4	No	2019-05-09	2020-04-15	12	10/30	Single Target	Event	17 months
9	Female	33	1	T2	1/15	ER(-)/PR(-)	0.4	No	2019-05-21	2019-11-03	6	Not Recurrence	Single Target	Missing	39 months
10	Female	35	ND	T1	9/20	ER(-)/PR(-)	20%+	Yes	2019-05-23	2020-11-11	6	Not Recurrence	Single Target	Missing	39 months
11	Female	29	1	T3	6/25	ER(-)/PR(-)	0.4	No	2019-05-24	2020-05-18	12	Not Recurrence	Single Target	Missing	39 months
12	Female	45	1	T2	5/15	ER(5%) PR(5%)	0.4	No	2019-05-28	2020-05-23	12	Not Recurrence	Single Target	Missing	39 months
13	Female	43	1	T2	6	ER(95%) PR(70%)	0.5	No	2019-06-20	2019-12-04	6	Not Recurrence	Single Target	Missing	38 months
14	Female	44	0	T2	6/26	ER(80%) PR(80%)	0.7	No	2019-06-19	2019-12-08	6	Not Recurrence	Single Target	Missing	38 months
15	Female	65	1	T3	2/18	ER(-) PR(-)	0.3	No	2019-07-01	2019-12-10	6	Not Recurrence	Single Target	Missing	38 months
16	Female	61	ND	T1	1/30	ER(-) PR(-)	0.8	No	2019-07-07	2020-01-15	6	2020-06-30	Single Target	Event	11 months
17	Female	45	0	T1	0	ER(<1%) PR(-)	0.4	Yes	2019-06-23	2020-07-09	12	Not Recurrence	Dual Target	Missing	38 months
18	Female	49	ND	T2	5/22	ER(70%) PR(-)	0.25	No	2019-07-01	2020/7/6-2020/7/9	＜1 week	/	Single Target	Missing	38 months
19	Female	56	ND	T3	23/24（N3）	ER(-) PR(-)	0.4	No	2019-06-27	2019/6/29-30	＜1 week	/	Single Target	Missing	38 months
20	Female	54	1	T2	1/18（N1）	ER(90%) PR(90%)	0.6	No	2019-07-09	2020-06-28	12	Not Recurrence	Single Target	Missing	38 months
21	Female	33	0	T2	1/19（N1）	ER(-) PR(-)	0.7	No	2019-07-22	2020-08-25	12	Not Recurrence	Single Target	Missing	38 months
22	Female	47	1	T2	2/20	ER(90%) PR(70%)	0.7	No	2019-07-26	2020-07-07	12	Not Recurrence	Single Target	Missing	38 months
23	Female	34	ND	T2	0	ER(80%) PR(30%)	0.05	Yes	2019-08-16	2020-08-19	12	Not Recurrence	Single Target	Missing	37 months
24	Female	47	0	T2	10/33	ER(-) PR(-)	0.5	No	2019-08-06	2020-01-28	6	/	Single Target	Missing	37 months
25	Female	60	0	T2	1	ER(-) PR(-)	0.5	No	2019-08-06	2020-07-10	12	Not Recurrence	Single Target	Missing	37 months
26	Female	54	ND	T2	3/26	ER(-) PR(-)	0.6	No	2019-08-20	2020/1/15	＜3 weeks	/	Single Target	Missing	37 months
27	Female	57	ND	T2	1/17	ER(-) PR(-)	0.4	No	2019-08-20	2019-08-25	Unknown	/	Single Target	Missing	37 months
28	Female	65	ND	T1	2/9	ER(90%) PR(-)	0.3	No	2019-09-16	2020-08-12	12	Not Recurrence	Single Target	Missing	36 months
29	Female	38	0-1	T2	15/26	ER(70%) PR(80%)	0.15	No	2019-09-16	2020-10-18	12	Not Recurrence	Single Target	Missing	36 months
30	Female	45	0	T1	3/23	ER(90%) PR(40%)	0.4	No	2019-09-20	2020-08-22	12	Not Recurrence	Single Target	Missing	36 months
31	Female	60	1	T2	2/16	ER(90%) PR(-)	0.25	No	2019-09-19	2020-03-09	6	Not Recurrence	Single Target	Missing	36 months
32	Female	55	1	T2	0	ER(-) PR(-)	0.6	No	2019-10-22	2020-04-18	6	Not Recurrence	Single Target	Missing	35 months
33	Female	52	1	T2	24/28	ER(20%) PR(10%)	0.6	No	2019-10-22	2020-11-29	12	Not Recurrence	Single Target	Missing	35 months
34	Female	42	ND	T2	0	ER(90%) PR(50%)	0.8	No	2019-11-14	2020-10-20	12	Not Recurrence	Single Target	Missing	34 months
35	Female	51	0	T1	9/20	ER(10%) PR(-)	0.4	No	2019-11-18	2020-10-18	12	Not Recurrence	Single Target	Missing	34 months
36	Female	48	0	T1	1/16	ER(30%) PR(40%)	0.1	No	2019-11-15	2020-05-05	6	Not Recurrence	Single Target	Missing	34 months
37	Female	50	0	T2	0	ER(-) PR(-)	0.6	No	2019-11-27	2020-12-27	12	Not Recurrence	Single Target	Missing	33 months
38	Female	67	0	T2	0	ER(-) PR(-)	0.4	No	2019-12-07	2020-12-03	12	Not Recurrence	Single Target	Missing	33 months
39	Female	57	ND	T1	7/18	ER(+) PR(-)	50%+	No	2019-12-21	2020-11-23	12	Not Recurrence	Single Target	Missing	33 months
40	Female	53	ND	T2	2/19	ER(-) PR(-)	0.2	No	2020-01-10	2020-07-06	6	Not Recurrence	Single Target	Missing	32 months
41	Female	50	0	T1	0	ER(-) PR(-)	0.2	No	2020-02-01	2021-01-14	12	Not Recurrence	Single Target	Missing	32 months
42	Female	30	0	T1	0	ER(90%) PR(30%)	0.25	No	2020-01-16	2021-01-10	12	Not Recurrence	Single Target	Missing	32 months
43	Female	53	1	T2	1/13	ER(-) PR(-)	0.3	No	2020-01-14	2020-12-16	12	Not Recurrence	Single Target	Missing	32 months
44	Female	56	0	T2	0	ER(-) PR(-)	0.5	No	2020-01-21	2020-06-28	6	2021-06-01	Single Target	Event	17 months
45	Female	48	0	T1	3/10	ER(60%) PR(-)	0.1	Yes	2020-02-28	2020-07-21	6	Not Recurrence	Single Target	Missing	30 months
46	Female	35	0	T2	2/23	ER(50%) PR(10%)	0.2	No	2020-02-29	2020-07-21	6	Not Recurrence	Single Target	Missing	30 months
47	Female	55	1	T1	4/16	ER(-) PR(-)	0.45	Yes	2020-03-06	2020-08-26	6	Not Recurrence	Single Target	Missing	30 months
48	Female	46	ND	T1	0	ER(-) PR(-)	0.3	No	2020-03-07	2020-03-15	Unknown	/	Single Target	Missing	30 months
49	Female	49	0	T1	4/21	ER(-) PR(5%)	0.4	No	2020-03-13	2020-09-10	Unknown	Not Recurrence	Single Target	Missing	30 months
50	Female	67	1	T2	11/19	ER(-) PR(-)	0.3	No	2020-03-12	2020-09-01	6	Not Recurrence	Single Target	Missing	30 months
51	Female	68	0	T2	2/22	ER(100%) PR(2%)	0.85	No	2020-03-29	2021-02-26	12	Not Recurrence	Single Target	Missing	29 months
52	Female	40	0	T2	1/5	ER(-) PR(-)	0.3	No	2020-04-05	2021-04-14	12	Not Recurrence	Single Target	Missing	29 months
53	Female	48	0	T2	0	ER(-) PR(-)	0.6	No	2020-04-06	2021-03-20	12	Not Recurrence	Single Target	Missing	29 months
54	Female	53	0	T1	0/14	ER(-) PR(-)	0.5	No	2020-04-01	2021-03-12	12	Not Recurrence	Single Target	Missing	29 months
55	Female	33	0	T2	3/13	ER(5%) PR(-)	0.1	No	2020-04-14	2021-03-25	12	Not Recurrence	Single Target	Missing	29 months
56	Female	25	ND	T2	0	ER(30%) PR(-)	0.6	No	2020-04-24	2020-10-10	6	Not Recurrence	Single Target	Missing	28 months
57	Female	48	ND	T2	7/23	ER(50%) PR(10%)	0.3	No	2020-04-12	2021-03-29	12	Not Recurrence	Single Target	Missing	28 months
58	Female	59	ND	T2	1/29	ER(-) PR(-)	0.3	No	2020-04-30	2020-10-20	6		Single Target	Missing	28 months
59	Female	64	2	T2	1/26	ER(-) PR(-)	0.3	Yes	2020-05-06	2020-07-15	Unknown	/	Single Target	Missing	28 months
60	Female	62	0	T2	0	ER(90%) PR(90%)	0.2	No	2020-05-11	2021-04-11	12	Not Recurrence	Single Target	Missing	27 months
61	Female	41	0	T2	2/11	ER(-) PR(-)	0.1	No	2020-05-16	2020-10-19	6	Not Recurrence	Single Target	Missing	27 months
62	Female	52	0	T2	2/18	ER(20%) PR(1%)	0.2	Yes	2020-05-19	2021-04-17	12	Not Recurrence	Single Target	Missing	27 months
63	Female	33	ND	T1	5/18	ER(70%) PR(-)	0.1	Yes	2020-05-27	2021-05-27	12	Not Recurrence	Single Target	Missing	27 months
64	Female	35	1	T2	0	ER(-) PR(-)	0.6	Yes	2020-06-03	2021-05-09	12	Not Recurrence	Single Target	Missing	27 months
65	Female	30	ND	T1	0	ER(-) PR(-)	0.4	No	2020-06-04	2020-11-22	6	Not Recurrence	Single Target	Missing	27 months
66	Female	63	0	T1	1/23	ER(-) PR(-)	50%+	No	2020-06-18	2020/6/21-2020/6/22	＜1week	/	Single Target	Missing	26 months
67	Female	54	ND	T3	17/30	ER(-) PR(-)	15-20%	No	2020-06-22	2021-05-21	12	Not Recurrence	Single Target	Missing	26 months
68	Female	64	0	T2	0	ER(5%) PR(-)	0.7	No	2020-06-29	2020-07-04	Unknown	/	Single Target	Missing	26 months
69	Female	49	0	T1	2/10	ER(-) PR(-)	0.1	No	2020-07-13	2020-07-01	12	Not Recurrence	Single Target	Missing	25 months
70	Female	45	ND	T2	6/29	ER(-) PR(-)	0.6	No	2020-07-16	2021-06-28	12	Not Recurrence	Single Target	Missing	25 months
71	Female	39	ND	T1	6/22	ER(-) PR(-)	0.5	No	2020-07-16	2021-06-28	12	Not Recurrence	Single Target	Missing	25 months
72	Female	58	0	T1	5	ER(5%) PR(2%)	0.4	No	2020-09-30	2021-07-16	12	Not Recurrence	Single Target	Missing	23 months
73	Female	45	0	T1	0/12	ER(95%) PR(50%)	0.4	No	2020-10-03	2021-09-24	12	Not Recurrence	Single Target	Missing	23 months
74	Female	54	0	T2	0/16	ER(-) PR(-)	低	Yes	2020-09-14	2021-08-20	12	Not Recurrence	Single Target	Missing	23 months
75	Female	30	0	T1	16/36	ER(80%) PR(-)	0.07	No	2020-09-04	2021-08-04	12	2022/1	Single Target	Event	16 months
76	Female	49	0	T2	1/17	ER-a(-) PR(-)	15%+	Yes	2020-10-10	2021-09-16	12	Not Recurrence	Single Target	Missing	23 months
77	Female	35	0	Unknown	0	ER(-) PR(-)	0.2	No	2020-10-20	2021-03-08	6	Not Recurrence	Single Target	Missing	22 months
78	Female	52	1	T3	0	ER(-) PR(-)	60%+	Yes	2020-11-01	2021-10-10	12	Not Recurrence	Single Target	Missing	21 months
79	Female	50	0	T1	0	ER(-) PR(-)	~40%	No	2020-11-01	2021-10-10	12	Not Recurrence	Single Target	Missing	21 months
80	Female	57	0	T1	0/12	ER(70%) PR(-)	~30%+	No	2020-11-08	2021-10-23	12	Not Recurrence	Single Target	Missing	21 months
81	Female	54	0	T2	19/21	ER(-) PR(-)	~20%	No	2020-11-12	2021-11-26	2 week	Not Recurrence	Single Target	Missing	21 months
82	Female	48	0	T2	2/8	ER(+) PR(-)	0.2	No	2020-11-20	2021-10-20	12	Not Recurrence	Dual Target	Missing	21 months
83	Female	27	0	T1	0/18	ER++(70%) PR++(50%)	＜5%	Yes	2020-12-10	2021-06-01	6	Not Recurrence	Dual Target	Missing	20 months
84	Female	52	0	T1	9/17	ER++(80%) PR++(80%)	0.15	No	2020-12-10	2021-06-01	6	Not Recurrence	Dual Target	Missing	20 months
85	Female	53	1	T2	8/18	ER(-) PR(-)	0.1	No	2021-02-05	2022-04-08	12	Not Recurrence	Single Target	Missing	19 months
86	Female	56	0	T2	16/20	ER(-) PR(-)	~60%+	No	2020-12-25	2021-12-19	12	Not Recurrence	Single Target	Missing	20 months
87	Female	42	0	T4	13/23	ER(-a)10% PR(30%)	0.2	Yes	2021-01-15	2021-12-17	12	Not Recurrence	Dual Target	Missing	20 months
88	Female	62	0	T2	0/12	ER(+) (80%) PR(+)(1%)	~20%	Yes	2021-01-16	2021-12-15	12	Not Recurrence	Single Target	Missing	20 months
89	Female	53	0	T2	0	ER(-) PR(-)	30%+	Yes	2021-01-17	2021-07-17	6	Not Recurrence	Dual Target	Missing	20 months
90	Female	51	0	T2	5	ER(-) PR(-)	30%+	No	2021-01-07	2021-07-01	6	Not Recurrence	Single Target	Missing	20 months
91	Female	48	0	T2	8/15	ER(+60%) PR(++30%)	0.1	No	2021-01-19	2022-01-05	12	Not Recurrence	Dual Target	Missing	20 months
92	Female	50	1	Unknown	3/27	ER(+20%) PR(++30%)	80%+	No	2020-04-08	2021-03-18	12	Not Recurrence	Single Target	Missing	29 months
94	Female	50	0	T2	1/19	ER(-) PR(-)	80%+	No	2020-12-25	2021-11-26	12	Not Recurrence	Dual Target	Missing	20 months
95	Female	57	1	T2	2/6	ER(-) PR(-)	40%+	Yes	2021-01-26	2022-01-29	12	Not Recurrence	Dual Target	Missing	19 months
96	Female	52	0	T2	0	ER(-) PR(-)	30%+	No	2021-02-08	2022-02-08	12	Not Recurrence	Single Target	Missing	19 months
97	Female	49	0	T2	4/17	ER(-) PR(-)	40%+	No	2021-01-14	2021-12-14	12	Not Recurrence	Dual Target	Missing	20 months
98	Female	46	0	T2	13/14	ER(-) PR(-)	70%+	No	2021-01-13	2022-01-22	12	Not Recurrence	Dual Target	Missing	20 months
99	Female	55	0	T2	10/15	ER(+) PR(-)	20%+	No	2021-01-15	2022-01-10	12	Not Recurrence	Dual Target	Missing	20 months
100	Female	46	0	T1	0/12	ER(+，1%) PR(+，1%)	60%+	No	2021-02-18	2022-08-13	6	Not Recurrence	Dual Target	Missing	19 months
101	Female	38	0	T2	4/18	ER(70%+) PR(30%+++)	70%+	No	2021-02-25	2021-10-08	8	Not Recurrence	Dual Target	Missing	19 months
102	Female	48	0	T1	0	ER(-) PR(-)	20%+	No	2021-03-03	2022-01-03	12	Not Recurrence	Dual Target	Missing	18 months
103	Female	37	0	T2	1/27	ER(-) PR(-)	Invasive component (hotspot area)~ 40%; In situ carcinoma component (hotspot area)~80%	No	2021-02-07	2021-02-21	2 weeks	/	Dual Target	Missing	19 months
104	Female	54	0	T2	2/5	ER-a(2%+) PR(-)	30%+	No	2021-02-08	2022-01-10	12	Not Recurrence	Single Target	Missing	19 months
105	Female	45	0	T1	8/25	ER(80%，3+) PR(<2%,1+)	10%+	Yes	2021-03-05	2022-03-16	12	Not Recurrence	Dual Target	Missing	18 months
106	Female	55	0	T2	3/18	ER(+) 90% PR(+)5%	~20%	No	2021-02-24	2021-08-14	6	Not Recurrence	Dual Target	Missing	18 months
107	Female	49	0	T1p	28/29	ER(-) PR(-)	20%+	No	2021-03-17	2021-03-24	1 week	/	Dual Target	Missing	18 months
108	Female	56	0	T2	22/36	ER(-) PR(-)	40%+	No	2021-03-18	2022-03-06	12	Not Recurrence	Dual Target	Missing	18 months
109	Female	72	0	T2	0	ER(-) PR(-)	（+）70%	No	2021-01-30	2021-03-27	2 months	/	Dual Target	Missing	19 months
110	Female	46	0	T2	8/18	ER(+) 90% PR(+)90%	（+）30%	No	2021-01-10	2021-12-12	12	Not Recurrence	Dual Target	Missing	20 months
111	Female	60	0	T1	15/29	ER(<5%+) PR<5%+)	30%+	No	2021-03-17	2022-03-06	12	Not Recurrence	Dual Target	Missing	18 months
112	Female	37	0	T3	1/28	ER(-) PR(1+)10%	（+）70%	No	2021-01-21	2021-07-15	6	Not Recurrence	Dual Target	Missing	19 months
113	Female	51	0	T2	4/23	ER(-) PR(-)	40%	No	2021-03-23	2022-04-01	12	Not Recurrence	Dual Target	Missing	18 months
114	Female	46	0	T2	2/11	ER(++) 2% PR(-)	（+，15-20%）	No	2021-04-02	2021-04-15	1	/	Dual Target	Missing	18 months
115	Female	57	0	T2	6/28	ER(-) PR(-)	20%+	No	2021-04-01	2022-04-07	12	Not Recurrence	Dual Target	Missing	18 months
116	Female	48	1	T1	0	ER90%+++ PR80+++	20%+	No	2021-02-15	2021-12-18	12	Not Recurrence	Single Target	Missing	19 months
117	Female	51	0	T1	2/18	ER(++，40%) PR(+++80%)	0.09	No	2021-04-11	2022-04-15	12	Not Recurrence	Single Target	Missing	17 months
118	Female	50	0	T2	0/7	ER15%++ PR(-)	0.3	Yes	2021-04-08	2021-10-04	6	Not Recurrence	Single Target	Missing	17 months
119	Female	56	0	T2	4/21	ER(-) PR(-)	~30%	No	2021-04-08	2022-03-10	12	Not Recurrence	Single Target	Missing	17 months
120	Female	62	0	T2	1/25	ER(-) PR(-)	~10%	No	2021-02-23	2021-08-16	6	Not Recurrence	Dual Target	Missing	19 months
121	Female	52	0	T2	2/22	ER(70%,2+) PR(30%,2+)	40%+	No	2021-04-19	2022-04-02	12	Not Recurrence	Dual Target	Missing	17 months
122	Female	68	0	T2	1/27	ER(-) PR(-)	60%+	No	2021-04-22	2021-07-30	4	Not Recurrence	Dual Target	Missing	17 months
123	Female	59	0	T2	9	ER(10%) PR(-)	60%+	Yes	2021-05-11	2021-05-17	1 week	/	Dual Target	Missing	16 months
124	Female	53	0	T2	12/22	ER(-) PR(-)	0.3	No	2021-04-22	2022-04-12	12	Not Recurrence	Single Target	Missing	17 months
125	Female	48	0	T2	7/13	ER-a(-) PR(-)	0.3	No	2021-04-27	2022-05-07	12	2022/6	Dual Target	Event	14 months
126	Female	50	0	T2	9/28	ER(-) PR(-)	80%+	No	2021-04-28	2022-03-20	12	Not Recurrence	Dual Target	Missing	17 months
127	Female	48	0	T2	6/16	ER(-) PR(约5%++)	~20%+	No	2021-05-18	2022-05-17	12	Not Recurrence	Dual Target	Missing	16 months
128	Female	45	0	T2	16/27	ER-a(40%+) PR(40%+)	60%+	No	2021-06-04	2022-05-08	12	Not Recurrence	Dual Target	Missing	16 months
129	Female	56	0	T1	7/19	ER(-) PR(-)	0.3	No	2021-07-28	2022-06-30	12	Not Recurrence	Dual Target	Missing	14 months
130	Female	37	1	T1	10/26	ER(80%,++) PR(30%,++)	40%+	No	2021-07-26	2022-07-25	12	Not Recurrence	Dual Target	Missing	14 months
131	Female	42	0	T2	3/10	ER(60%,3+) PR(30%,2+)	30%+	Yes	2021-08-06	2022-08-01	12	Not Recurrence	Dual Target	Missing	13 months
132	Female	51	0	T2	10/19	ER(+) 90%，PR(+)90% ER(+) 90%，PR(+)90%	Right breast upper inner 20% Right breast upper outer 15%	No	2021-08-15	2022-08-17	12	Not Recurrence	Dual Target	Missing	13 months
133	Female	50	0	T3	0/17	ER(-) PR(-)	0.6	No	2021-08-18	2022-09-10	12	Not Recurrence	Dual Target	Missing	12 months
135	Female	54	1	T3	0	ER(+) PR(+)	3%+	Yes	2021-09-16	2022-09-14	12	Not Recurrence	Dual Target	Missing	12 months
136	Female	49	0	T2	15/26	ER(-) PR(-)	0.4	No	2021-10-26	Not discontinued	12	Not Recurrence	Dual Target	Missing	11 months
137	Female	58	0	T4	1	ER(-) PR(-)	~50%+	Yes	2021-11-16	Not discontinued	12	Not Recurrence	Dual Target	Missing	10 months
138	Female	60	0	T1	1/26	ER(-) PR(-)	~40%+	No	2021-11-18	Not discontinued	12	Not Recurrence	Dual Target	Missing	10 months
139	Female	57	0	T3	3/9	ER(+) 30% PR(-)	0.4	Yes	2021-11-18	Not discontinued	12	Not Recurrence	Dual Target	Missing	10 months
140	Female	56	0	T3	14/30	ER(0%+) PR(0%+)	~60%+	No	2022-01-18	Not discontinued	12	Not Recurrence	Dual Target	Missing	8 months
141	Female	54	0	T1	1/10	ER(10%++) PR(-)	60%+	No	2022-01-19	Not discontinued	12	Not Recurrence	Dual Target	Missing	8 months
142	Female	39	0	T2	4/35	ER(-) PR(-)	0.4	No	2022-02-16	Not discontinued	12	Not Recurrence	Dual Target	Missing	7 months
143	Female	56	1	T1	15/36	ER(-) PR(-)	60%+	No	2022-02-16	Not discontinued	12	Not Recurrence	Dual Target	Missing	7 months

## Sheet: Dose
Pyrotinib Records
No	Initial Dosage (mg)	Administration date	Dose Adjustment (discontinuation/reduce/increase/resume)	Adjusted Dose（mg）	Dose Adjustment Date
001	400	2019-06-09	Discontinuation	0	2020-06-09
001	0	2019-06-10	Resume	400	2019-06-10
001	400	2019-07-23	Discontinuation	0	2019-07-23
001	0	2019-07-24	Resume	400	2019-07-24
001	400	2019-07-29	Discontinuation	0	2019-07-29
001	0	2019-07-30	Resume	400	2019-07-30
001	400	2019-09-02	Discontinuation	0	2019-09-02
001	0	2019-09-03	Resume	400	2019-09-03
001	400	2019-10-07	Discontinuation	0	2019-10-07
001	0	2019-10-10	Resume	400	2019-10-10
001	400	2019-10-16	Discontinuation	0	2019-10-16
001	0	2019-10-20	Resume	400	2019-10-20
001	400	2019-11-10	Discontinuation	0	2019-11-10
005	400	2019-05-06	Discontinuation	0	2019-05-06
005	0	2019-05-07	Resume	400	2019-05-07
008	400	2019-05-15	Discontinuation	0	2019-05-15
008	400	2019-05-16	Discontinuation	0	2019-05-16
008	400	2019-08-01	Discontinuation	0	2019-08-01
008	0	2019-08-02	Resume	400	2019-08-02
011	400	2019-07-16	Discontinuation	0	2019-07-16
011	0	2019-07-17	Resume	400	2019-07-17
012	400	2019-07-16	Discontinuation	0	2019-07-16
012	0	2019-07-17	Resume	400	2019-07-17
012	400	2019-08-15	Discontinuation	0	2019-08-15
012	0	2019-08-16	Resume	400	2019-08-16
012	400	2019-10-08	Discontinuation	0	2019-10-08
012	0	2019-10-09	Resume	400	2019-10-09
012	400	2019-11-15	Discontinuation	0	2019-11-15
012	0	2019-11-16	Resume	400	2019-11-16
012	400	2020-02-14	Discontinuation	0	2020-02-14
012	0	2020-02-24	Resume	400	2020-02-24
012	400	2019-03-06	Discontinuation	0	2019-03-06
012	0	2020-03-17	Reduce	320	2020-03-17
016	400	2019-07-14	Discontinuation	0	2019-07-14
016	0	2019-07-15	Resume	400	2019-07-15
016	400	2019-11-22	Discontinuation	0	2019-11-22
016	0	2019-12-07	Resume	400	2019-12-07
017	400	2019-06-25	Discontinuation	0	2019-06-25
017	0	2019-06-26	Resume	400	2019-06-26
017	400	2019-07-10	Discontinuation	0	2019-07-10
017	0	2019-07-11	Resume	400	2019-07-11
017	400	2019-07-21	Discontinuation	0	2019-07-21
017	0	2019-07-22	Resume	400	2019-07-22
017	400	2019-07-31	Discontinuation	0	2019-07-31
017	0	2019-08-01	Resume	400	2019-08-01
017	400	2019-08-04	Discontinuation	0	2019-08-04
017	0	2019-08-06	Resume	400	2019-08-06
017	400	2019-08-10	Discontinuation	0	2019-08-10
017	0	2019-08-11	Resume	400	2019-08-11
017	400	2019-08-24	Discontinuation	0	2019-08-24
017	0	2019-08-27	Resume	400	2019-08-27
017	400	2019-08-30	Discontinuation	0	2019-08-30
017	0	2019-08-31	Resume	400	2019-08-31
017	400	2019-09-13	Discontinuation	0	2019-09-13
017	0	2019-09-14	Resume	400	2019-09-14
017	400	2019-09-19	Discontinuation	0	2019-09-19
017	0	2019-09-20	Resume	400	2019-09-20
017	400	2019-10-19	Discontinuation	0	2019-10-19
017	0	2019-10-20	Resume	400	2019-10-20
017	400	2019-10-26	Discontinuation	0	2019-10-26
017	0	2019-10-31	Resume	400	2019-10-31
017	400	2019-11-07	Discontinuation	0	2019-11-07
017	0	2019-11-08	Resume	400	2019-11-08
017	400	2019-11-15	Discontinuation	0	2019-11-15
017	0	2019-11-16	Resume	400	2019-11-16
017	400	2019-11-22	Discontinuation	0	2019-11-22
017	0	2019-11-25	Resume	400	2019-11-25
017	400	2019-12-03	Discontinuation	0	2019-12-03
017	0	2019-12-06	Resume	400	2019-12-06
017	400	2019-12-13	Discontinuation	0	2019-12-13
017	0	2019-12-14	Resume	400	2019-12-14
017	400	2020-01-07	Discontinuation	0	2020-01-07
017	0	2020-01-10	Resume	400	2020-01-10
017	400	2020-01-15	Discontinuation	0	2020-01-15
017	0	2020-01-16	Resume	400	2020-01-16
017	400	2020-01-25	Discontinuation	0	2020-01-25
017	0	2020-01-26	Resume	400	2020-01-26
017	400	2020-02-09	Discontinuation	0	2020-02-09
017	0	2020-02-11	Resume	400	2020-02-11
017	400	2020-02-17	Discontinuation	0	2020-02-17
017	0	2020-02-18	Resume	400	2020-02-18
017	400	2020-03-11	Discontinuation	0	2020-03-11
017	0	2020-03-14	Resume	400	2020-03-14
017	400	2020-03-15	Discontinuation	0	2020-03-15
017	0	2020-03-16	Resume	400	2020-03-16
017	400	2020-04-09	Discontinuation	0	2020-04-09
017	0	2020-04-10	Resume	400	2020-04-10
017	400	2020-04-13	Discontinuation	0	2020-04-13
017	0	2020-05-13	Resume	400	2020-05-13
017	400	2020-07-03	Discontinuation	0	2020-07-03
017	0	2020-07-04	Resume	400	2020-07-04
018	400	2019-07-06	Discontinuation	0	2019-07-06
018	0	2019-07-10	Resume	400	2019-07-10
018	400	2019-07-15	Discontinuation	0	2019-07-15
020	400	2019-10-23	Discontinuation	0	2019-10-23
020	0	2019-10-25	Resume	400	2019-10-25
020	400	2019-12-29	Discontinuation	0	2019-12-29
020	0	2020-01-06	Resume	400	2020-01-06
021	400	2019-08-25	Discontinuation	0	2019-08-25
022	400	2019-10-10	Discontinuation	0	2019-10-10
022	0	2019-10-11	Resume	400	2019-10-11
022	400	2019-10-15	Discontinuation	0	2019-10-15
022	0	2019-10-16	Resume	400	2019-10-16
022	400	2019-12-07	Discontinuation	0	2019-12-07
022	0	2019-12-08	Resume	400	2019-12-08
022	400	2019-12-10	Discontinuation	0	2019-12-10
022	0	2019-12-11	Resume	400	2019-12-11
022	400	2020-01-05	Discontinuation	0	2020-01-05
022	0	2020-01-07	Resume	400	2020-01-07
022	400	2020-03-26	Discontinuation	0	2020-03-26
022	0	2020-03-27	Resume	400	2020-03-27
022	400	2020-04-06	Discontinuation	0	2020-04-06
022	0	2020-04-07	Resume	400	2020-04-07
023	400	2019-08-22	Discontinuation	0	2019-08-22
023	0	2019-08-31	Resume	400	2019-08-31
026	400	2019-09-17	Discontinuation	0	2019-09-17
026	0	2019-09-24	Reduce	320	2019-09-24
026	320	2019-10-08	Discontinuation	0	2019-10-08
026	0	2019-10-20	Resume	320	2019-10-20
026	320	2019-10-28	Discontinuation	0	2019-10-28
026	0	2019-12-16	Resume	320	2019-12-16
026	320	2020-01-15	Discontinuation	0	2020-01-15
028	400	2019-09-16	Reduce	320	2020-09-27
029	400	2019-11-29	Discontinuation	0	2019-11-29
029	0	2019-11-30	Resume	400	2019-11-30
029	400	2020-01-24	Discontinuation	0	2020-01-24
029	0	2020-01-26	Resume	400	2020-01-26
029	400	2020-01-30	Discontinuation	0	2020-01-30
029	0	2020-01-31	Resume	400	2020-01-31
029	400	2020-02-09	Discontinuation	0	2020-02-09
029	0	2020-02-10	Resume	400	2020-02-10
029	400	2020-03-04	Discontinuation	0	2020-03-04
029	0	2020-03-05	Resume	400	2020-03-05
029	400	2020-03-09	Discontinuation	0	2020-03-09
029	0	2020-03-10	Resume	400	2020-03-10
029	400	2020-04-07	Discontinuation	0	2020-04-07
029	0	2020-04-08	Resume	400	2020-04-08
029	400	2020-05-27	Discontinuation	0	2020-05-27
029	0	2020-05-28	Resume	400	2020-05-28
029	400	2020-06-17	Discontinuation	0	2020-06-17
029	0	2020-06-18	Resume	400	2020-06-18
029	400	2020-10-16	Discontinuation	400	2020-10-16
029	0	2020-10-09	Resume	400	2020-10-09
032	400	2019-10-30	Discontinuation	0	2019-10-30
032	0	2019-10-31	Resume	400	2019-10-31
033	400	2019-11-30	Discontinuation	0	2019-11-30
033	0	2019-12-01	Resume	400	2019-12-01
033	400	2019-12-29	Discontinuation	0	2019-12-29
033	0	2019-12-30	Resume	400	2019-12-30
033	400	2020-01-25	Discontinuation	0	2020-01-25
033	0	2020-01-26	Resume	400	2020-01-26
033	400	2020-02-22	Discontinuation	0	2020-02-22
033	0	2020-02-23	Resume	400	2020-02-23
033	400	2020-03-16	Discontinuation	0	2020-03-16
033	0	2020-03-17	Resume	400	2020-03-17
033	400	2020-04-28	Discontinuation	0	2020-04-28
033	0	2020-04-29	Resume	400	2020-04-29
033	400	2020-05-18	Discontinuation	0	2020-05-18
033	0	2020-05-20	Resume	400	2020-05-20
033	400	2020-07-09	Discontinuation	0	2020-07-09
033	0	2020-07-11	Resume	400	2020-07-11
033	400	2020-08-01	Discontinuation	0	2020-08-01
033	0	2020-08-02	Resume	400	2020-08-02
033	400	2020-08-12	Discontinuation	0	2020-08-12
033	0	2020-08-13	Resume	400	2020-08-13
033	400	2020-08-25	Discontinuation	0	2020-08-25
033	0	2020-08-26	Resume	400	2020-08-26
033	400	2020-08-31	Discontinuation	0	2020-09-01
033	0	2020-09-02	Resume	400	2020-09-02
033	400	2020-10-14	Discontinuation	0	2020-10-14
033	0	2020-10-15	Resume	400	2020-10-15
033	400	2020-11-03	Discontinuation	0	2020-11-03
033	0	2020-11-04	Resume	400	2020-11-04
033	400	2020-11-09	Discontinuation	0	2020-11-09
033	0	2020-11-10	Resume	400	2020-11-10
033	400	2020-11-21	Discontinuation	0	2020-11-21
033	0	2020-11-22	Resume	400	2020-11-22
035	400	2020-06-06	Discontinuation	0	2020-06-08
035	0	2020-06-09	Resume	400	2020-06-09
035	400	2020-06-23	Discontinuation	0	2020-06-23
035	0	2020-06-24	Resume	400	2020-06-24
035	400	2020-07-31	Discontinuation	0	2020-06-23
035	0	2020-07-31	Resume	400	2020-06-24
035	400	2020-08-09	Discontinuation	0	2020-06-23
035	0	2020-08-09	Resume	400	2020-06-24
035	400	2020-09-05	Discontinuation	0	2020-09-06
035	0	2020-08-09	Resume	400	2020-06-24
035	400	2020-09-23	Discontinuation	0	2020-09-23
035	0	2020-09-24	Resume	400	2020-09-24
041	400	2020-07-17	Discontinuation	0	2020-07-17
041	0	2020-07-18	Resume	400	2020-07-18
043	400	2020-10-01	Discontinuation	0	2020-10-01
049	400	2020-06-05	Discontinuation	0	2020-06-05
049	0	2020-06-07	Resume	400	2020-06-07
053	400	2020-06-01	Discontinuation	0	2020-06-01
053	0	2020-06-02	Resume	400	2020-06-02
054	400	2020-04-15	Discontinuation	0	2020-04-15
054	0	2020-05-15	Reduce	240	2020-05-15
054	240	2020-05-22	Increase	320	2020-05-22
054	240	2020-07-26	Increase	400	2020-07-26
055	400	2020-05-14	Discontinuation	0	2020-05-14
055	0	2020-05-15	Resume	400	2020-05-15
055	400	2020-06-01	Discontinuation	0	2020-06-01
055	0	2020-06-02	Resume	400	2020-06-02
055	400	2020-08-20	Discontinuation	0	2020-08-21
055	0	2020-08-22	Resume	400	2020-08-22
055	400	2020-12-18	Discontinuation	0	2020-12-18
055	0	2020-12-19	Resume	400	2020-12-19
055	400	2020-06-01	Discontinuation	0	2020-06-01
055	0	2020-06-02	Resume	400	2020-06-02
055	400	2021-01-28	Discontinuation	0	2021-01-28
055	0	2021-01-29	Resume	400	2021-01-29
055	400	2021-02-06	Discontinuation	0	2021-02-06
055	0	2021-02-07	Resume	400	2021-02-07
055	400	2021-02-28	Discontinuation	0	2021-02-28
055	0	2021-03-01	Resume	400	2021-03-01
061	400	2020-05-16	Discontinuation	0	2020-05-19
061	0	2020-05-21	Reduce	240	2020-05-21
061	240	2020-06-12	Discontinuation	0	2020-06-12
061	0	2020-06-13	Increase	320	2020-06-13
063	320	2020-12-05	Discontinuation	320	2020-12-05
063	0	2020-12-06	Resume	320	2020-12-06
065	400	2020-08-09	Discontinuation	0	2020-08-09
065	0	2020-08-19	Resume	400	2020-08-19
067	400	2020-07-29	Discontinuation	0	2020-07-29
067	0	2020-07-30	Resume	400	2020-07-30
069	400	2020-09-21	Discontinuation	0	2020-09-21
069	0	2020-09-22	Resume	400	2020-09-22
075	400	2020-10-24	Discontinuation	0	2020-10-24
075	0	2020-10-25	Resume	400	2020-10-25
075	400	2020-10-26	Discontinuation	0	2020-10-26
075	0	2020-10-27	Resume	400	2020-10-27
075	400	2020-11-29	Discontinuation	0	2020-11-29
075	0	2020-11-30	Resume	400	2020-11-30
075	400	2021-01-17	Discontinuation	0	2021-01-17
075	0	2021-01-18	Resume	400	2021-01-18
075	400	2021-04-26	Discontinuation	0	2021-04-26
075	0	2021-04-27	Resume	400	2021-04-27
075	400	2021-05-05	Discontinuation	0	2021-05-05
075	0	2021-05-06	Resume	400	2021-05-06
075	400	2021-05-11	Discontinuation	0	2021-05-11
075	0	2021-05-12	Resume	400	2021-05-12
075	400	2021-05-17	Discontinuation	0	2021-05-18
075	0	2021-05-19	Resume	400	2021-05-19
075	400	2021-05-30	Discontinuation	0	2021-05-30
075	0	2021-05-31	Resume	400	2021-05-19
075	400	2021-06-24	Discontinuation	0	2021-06-24
075	0	2021-06-25	Resume	400	2021-06-25
075	400	2021-06-30	Discontinuation	0	2021-06-30
075	0	2021-07-01	Resume	400	2021-07-01
080	400	2020-11-15	Discontinuation	0	2020-11-15
080	0	2020-11-16	Resume	400	2020-11-16
086	400	2021-03-22	Reduce	320	2021-03-22
086	320	2021-03-25	Resume	400	2021-03-25
086	400	2021-03-29	Reduce	320	2021-03-29
086	320	2021-04-09	Resume	400	2021-04-09
086	400	2021-05-08	Reduce	320	2021-05-08
086	320	2021-07-16	Resume	400	2021-07-16
086	400	2021-07-19	Reduce	320	2021-07-19
086	320	2021-07-23	Resume	400	2021-07-16
086	400	2021-07-19	Reduce	320	2021-07-19
089	400	2021-04-19	Discontinuation	0	2021-04-19
089	0	2021-04-20	Resume	400	2021-04-20
091	400	2021-01-23	Discontinuation	0	2021-01-23
091	0	2021-01-24	Resume	400	2021-01-24
091	400	2021-01-30	Reduce	320	2021-01-30
091	320	2021-02-25	Resume	400	2021-02-25
094	400	2020-12-13	Discontinuation	0	2020-12-13
094	0	2020-12-14	Resume	320	2020-12-14
096	400	2021-08-10	Reduce	320	2021-08-10
097	400	2021-03-27	Discontinuation	0	2021-03-27
097	0	2021-03-28	Resume	400	2021-03-28
097	400	2021-05-10	Reduce	240	2021-05-10
097	0	2021-05-11	Resume	400	2021-05-11
097	400	2021-06-02	Discontinuation	0	2021-06-02
097	0	2021-06-03	Resume	400	2021-06-03
097	400	2021-06-17	Discontinuation	0	2021-06-17
097	0	2021-06-18	Resume	400	2021-06-18
097	400	2021-08-17	Discontinuation	0	2021-08-17
097	0	2021-08-18	Resume	400	2021-08-18
097	400	2021-08-26	Discontinuation	0	2021-08-26
097	0	2021-08-27	Resume	400	2021-08-27
097	400	2021-09-16	Discontinuation	0	2021-09-16
097	0	2021-09-17	Resume	400	2021-09-17
097	400	2021-09-29	Discontinuation	0	2021-09-29
097	0	2021-09-17	Resume	400	2021-09-17
097	400	2021-10-05	Discontinuation	0	2021-10-05
097	0	2021-10-06	Resume	400	2021-10-06
097	400	2021-10-08	Discontinuation	0	2021-10-09
097	0	2021-10-10	Resume	400	2021-10-10
097	400	2021-10-18	Discontinuation	0	2021-10-18
097	0	2021-10-19	Resume	400	2021-10-19
097	400	2021-11-22	Discontinuation	0	2021-11-22
097	0	2021-11-23	Resume	400	2021-11-23
098	400	2021-02-25	Reduce	320	2021-02-25
098	0	2021-02-28	Resume	400	2021-02-28
101	400	2021-09-15	Discontinuation	0	2021-09-15
101	0	2021-09-16	Resume	400	2021-09-16
101	400	2021-09-19	Discontinuation	0	2021-09-21
101	0	2021-09-22	Resume	400	2021-09-22
101	400	2021-09-30	Discontinuation	0	2021-10-06
101	0	2021-10-07	Resume	400	2021-10-07
102	400	2021-03-03	Reduce	320	2021-03-03
102	320	2021-04-16	Increase	400	2021-04-16
102	400	2021-04-16	Reduce	320	2021-04-16
102	320	2021-07-19	Increase	400	2021-07-19
105	400	2021-05-05	Reduce	320	2021-05-05
111	320	2021-03-24	Increase	400	2021-03-24
111	400	2021-04-13	Discontinuation	0	2021-04-15
111	0	2021-04-16	Resume	400	2021-04-16
111	400	2021-06-09	Discontinuation	0	2021-06-09
111	0	2021-06-12	Resume	400	2021-06-12
111	400	2021-06-17	Discontinuation	0	2021-06-17
111	0	2021-06-18	Resume	400	2021-06-18
111	400	2021-06-23	Discontinuation	0	2021-06-23
111	0	2021-06-28	Resume	400	2021-06-28
111	400	2021-07-03	Discontinuation	0	2021-07-03
111	0	2021-07-06	Resume	400	2021-07-06
111	400	2021-07-08	Discontinuation	0	2021-07-08
111	0	2021-07-11	Resume	400	2021-07-11
111	400	2021-07-14	Discontinuation	0	2021-07-14
111	0	2021-07-04	Resume	400	2021-07-04
111	0	2021-07-16	Reduce	240	2021-07-16
111	0	2021-07-17	Reduce	160	2021-07-16
111	0	2021-07-19	上调	240	2021-07-19
111	0	2021-07-20	上调	320	2021-07-20
111	0	2021-07-23	上调	400	2021-07-23
111	0	2021-07-25	Reduce	320	2021-07-25
111	0	2021-07-26	上调	400	2021-07-26
111	0	2021-07-30	Reduce	240	2021-07-30
111	400	2021-08-01	Discontinuation	0	2021-08-01
111	0	2021-08-02	Resume	320	2021-08-02
111	0	2021-08-02	上调	320	2021-08-02
111	400	2021-08-22	Discontinuation	0	2021-08-22
111	0	2021-08-23	Resume	320	2021-08-23
111	400	2021-08-30	Discontinuation	0	2021-08-30
111	0	2021-09-02	Resume	320	2021-09-02
111	400	2021-09-06	Discontinuation	0	2021-09-06
111	0	2021-09-07	Resume	320	2021-09-07
111	400	2021-09-22	Discontinuation	0	2021-09-06
111	0	2021-09-23	Resume	320	2021-09-07
111	400	2021-09-25	Discontinuation	0	2021-09-06
111	0	2021-09-26	Resume	320	2021-09-07
111	400	2021-09-28	Discontinuation	0	2021-09-06
111	0	2021-09-29	Resume	320	2021-09-07
111	400	2021-10-09	Discontinuation	0	2021-09-06
111	0	2021-10-11	Resume	320	2021-09-07
111	400	2021-10-14	Discontinuation	0	2021-09-06
111	0	2021-10-15	Resume	320	2021-09-07
111	400	2021-10-18	Discontinuation	0	2021-09-06
111	0	2021-10-21	Resume	320	2021-09-07
111	400	2021-10-21	Discontinuation	0	2021-09-06
111	0	2021-10-22	Resume	320	2021-09-07
111	400	2021-10-29	Discontinuation	0	2021-09-06
111	0	2021-10-31	Resume	320	2021-09-07
111	400	2021-10-24	Discontinuation	0	2021-09-06
111	0	2021-10-25	Resume	320	2021-09-07
111	400	2021-11-11	Discontinuation	0	2021-09-06
111	0	2021-11-15	Resume	320	2021-09-07
111	400	2021-11-19	Discontinuation	0	2021-09-06
111	0	2021-11-20	Resume	320	2021-09-07
111	400	2021-11-25	Discontinuation	0	2021-09-06
111	0	2021-11-26	Resume	320	2021-09-07
111	400	2021-12-04	Discontinuation	0	2021-09-06
111	0	2021-12-07	Resume	320	2021-09-07
112	400	2021-02-15	Discontinuation	0	2021-02-15
112	0	2021-02-20	Reduce	320	2021-02-20
112	0	2021-03-04	Increase	400	2021-03-04
112	0	2021-04-28	Reduce	320	2021-04-28
115	400	2021-06-09	Discontinuation	0	2021-06-09
115	0	2021-06-10	Resume	400	2021-06-10
115	400	2021-06-09	Discontinuation	0	2021-06-09
115	0	2021-06-10	Resume	400	2021-06-10
116	400	2021-03-17	Discontinuation	0	2021-03-19
116	0	2021-03-20	Resume	400	2021-03-20
117	400	2021-06-24	Discontinuation	0	2021-06-24
117	0	2021-07-01	Resume	400	2021-07-01
117	400	2021-08-06	Discontinuation	0	2021-08-06
117	0	2021-08-12	Resume	400	2021-08-12
118	400	2021-04-12	Reduce	240	2021-04-12
118	400	2021-04-13	Resume	400	2021-04-13
118	400	2021-04-21	Discontinuation	0	2021-04-21
118	0	2021-04-22	Resume	400	2021-04-22
118	400	2021-04-24	Discontinuation	0	2021-04-24
118	0	2021-04-25	Resume	400	2021-04-25
118	400	2021-05-08	Reduce	240	2021-05-08
118	400	2021-05-23	上调	320	2021-05-23
118	400	2021-05-27	上调	400	2021-05-27
118	400	2021-05-30	Reduce	320	2021-05-30
118	400	2021-06-03	Discontinuation	0	2021-06-03
118	0	2021-06-04	Resume	400	2021-06-04
118	400	2021-06-18	Increase	400	2021-06-18
118	400	2021-06-30	Discontinuation	0	2021-06-30
118	0	2021-07-01	Resume	400	2021-07-01
126	320	2021-05-01	Increase	400	2021-05-01
126	400	2021-08-17	Discontinuation	0	2021-08-17
126	0	2021-08-18	Resume	400	2021-08-18
126	400	2021-08-23	Discontinuation	0	2021-08-23
126	0	2021-08-26	Resume	400	2021-08-26
126	400	2021-08-29	Discontinuation	0	2021-08-29
126	0	2021-09-02	Resume	400	2021-09-02
129	400	2022-01-09	Discontinuation	0	2022-01-11
129	400	2022-01-12	Discontinuation	0	2022-01-12
136	400	2021-09-20	Reduce	320	2021-09-26
136	320	2021-09-26	Reduce	240	2021-09-29
136	240	2021-09-29	Reduce	160	2021-09-30
136	160	2021-09-30	Increase	160	2021-10-09
136	0	2021-10-11	Discontinuation	240	2021-10-13

## Sheet: AE
Adverse Events
序号	Adverse Events	CTCAE 5.0	Start	End	Relationship with Pyrotinib	Outcome	SAE(Yes/No)	Change in Pyrotinib Dose
001	Neutrophil count decreased	1	2019-01-10	2019-04-01	Possible no relation	Recovery	No	No change
001	White blood cell count decreased	1	2019-01-10	2019-06-18	Possible no relation	Recovery	No	No change
001	Diarrhea	2	2019-01-14	2019-01-15	Highly Possible related	Recovery	No	No change
001	Fatigue	1	2019-01-14	2019-01-14	Possible related	Recovery	No	No change
001	Headache	1	2019-01-16	2019-01-17	Possible related	Recovery	No	No change
001	Nausea	1	2019-01-17	2019-01-18	Possible related	Recovery	No	No change
001	Diarrhea	2	2019-01-17	2019-01-18	Highly Possible related	Recovery	No	No change
001	Fatigue	1	2019-01-19	2019-01-21	Possible related	Recovery	No	No change
001	Diarrhea	1	2019-01-22	2019-01-22	Highly Possible related	Recovery	No	No change
001	Diarrhea	2	2019-01-25	2019-01-25	Highly Possible related	Recovery	No	No change
001	Diarrhea	2	2019-01-31	2019-01-31	Highly Possible related	Recovery	No	No change
001	Diarrhea	2	2019-02-08	2019-02-08	Highly Possible related	Recovering	No	No change
001	Diarrhea	1	2019-02-09	2019-02-09	Highly Possible related	Recovery	No	No change
001	Diarrhea	1	2019-02-12	2019-02-12	Highly Possible related	Deterioration of condition	No	No change
001	Diarrhea	2	2019-02-13	2019-02-13	Highly Possible related	Recovery	No	No change
001	Diarrhea	2	2019-02-15	2019-02-19	Highly Possible related	Recovering	No	No change
001	Fatigue	1	2019-02-16	2019-02-17	Possible related	Recovery	No	No change
001	Diarrhea	1	2019-02-20	2019-02-20	Highly Possible related	Deterioration of condition	No	No change
001	Diarrhea	2	2019-02-21	2019-02-23	Highly Possible related	Recovering	No	No change
001	Diarrhea	1	2019-02-24	2019-02-25	Highly Possible related	Deterioration of condition	No	No change
001	Diarrhea	2	2019-02-26	2019-02-26	Highly Possible related	Recovering	No	No change
001	Diarrhea	1	2019-02-27	2019-02-27	Highly Possible related	Deterioration of condition	No	No change
001	Diarrhea	2	2019-02-28	2019-02-28	Highly Possible related	Recovery	No	No change
001	Diarrhea	1	2019-03-01	2019-03-01	Highly Possible related	Recovering	No	No change
001	Diarrhea	1	2019-03-05	2019-03-05	Highly Possible related	Recovery	No	No change
001	Diarrhea	1	2019-03-08	2019-03-09	Highly Possible related	Recovery	No	No change
001	Diarrhea	2	2019-03-11	2019-03-11	Highly Possible related	Recovery	No	No change
001	Nausea	1	2019-03-18	2019-03-18	Possible related	Recovery	No	No change
001	Diarrhea	2	2019-03-18	2019-03-18	Highly Possible related	Recovery	No	No change
001	Diarrhea	2	2019-03-26	2019-03-27	Highly Possible related	Recovery	No	No change
001	Diarrhea	1	2019-03-31	2019-03-31	Highly Possible related	Deterioration of condition	No	No change
001	Diarrhea	2	2019-04-01	2019-04-01	Highly Possible related	Recovery	No	No change
001	Lymphocyte count decreased	1	2019-04-01	2019-06-18	Possible related	Recovery	No	No change
001	Diarrhea	2	2019-04-10	2019-04-10	Highly Possible related	Recovery	No	No change
001	Diarrhea	3	2019-04-14	2019-04-14	Highly Possible related	Recovering	No	No change
001	Diarrhea	2	2019-04-15	2019-04-15	Highly Possible related	Deterioration of condition	No	No change
001	Diarrhea	3	2019-04-16	2019-04-16	Highly Possible related	Recovery	No	No change
001	Diarrhea	2	2019-04-26	2019-04-28	Highly Possible related	Recovery	No	No change
001	Diarrhea	2	2019-08-20	2019-08-20	Highly Possible related	Recovery	No	No change
001	Hyperuricemia	1	2019-09-24		Possible related	Recovering	No	No change
001	Nausea	1	2019-10-07	2019-10-08	Possible related	Recovery	No	Interruption
001	Diarrhea	2	2019-10-07	2019-10-09	Highly Possible related	Recovery	No	No change
001	Diarrhea	2	2019-10-16	2019-10-19	Highly Possible related	Recovery	No	Interruption
001	Nausea	1	2019-10-16	2019-10-18	Possible related	Recovery	No	No change
001	Nausea	1	2019-11-07	2019-11-09	Possible related	Deterioration of condition	No	No change
001	Diarrhea	2	2019-11-08	2019-11-08	Highly Possible related	Recovery	No	No change
001	Diarrhea	2	2019-11-10	2019-11-10	Highly Possible related	Recovery	No	Discontinuation
001	Nausea	2	2019-11-10	2019-11-10	Possible related	Recovery	No	Discontinuation
001	Anorexia	1	2019-11-10	2019-11-15	Possible no relation	Recovery	No	Discontinuation
002	Lymphocyte count decreased	1	2019-01-10	2019-06-26	Possible no relation	Recovery	No	No change
002	Fatigue	2	2019-01-23	2019-02-03	Possible related	Recovery	No	No change
002	Tooth pain	2	2019-02-18	2019-02-18	Possible no relation	Recovering	No	No change
002	Nosebleed	1	2019-02-18	2019-02-18	Possible no relation	Recovery	No	No change
002	Diarrhea	3	2019-03-01	2019-03-01	Highly Possible related	Recovery	No	No change
002	Fatigue	1	2019-03-02	2019-03-07	Possible related	Recovery	No	No change
002	Oral mucositis	2	2019-03-26	2019-04-04	Possible related	Recovery	No	No change
002	Hand-foot syndrome	2	2019-10-15	2019-12-22	Possible related	Recovery	No	No change
002	Increased aspartate aminotransferase	1	2019-12-23		Possible related	Recovering	No	Discontinuation
003	Lymphocyte count decreased	1	2019-02-12	2019-10-24	Possible no relation	Recovery	No	No change
003	Diarrhea	1	2019-02-27	2019-03-12	Highly Possible related	Recovery	No	No change
003	Diarrhea	1	2019-03-17	2019-03-18	Highly Possible related	Recovery	No	No change
003	Diarrhea	1	2019-03-21	2019-03-24	Highly Possible related	Deterioration of condition	No	No change
003	Diarrhea	2	2019-03-25	2019-03-26	Highly Possible related	Recovery	No	No change
003	Diarrhea	1	2019-03-31	2019-04-12	Highly Possible related	Recovery	No	No change
003	Diarrhea	1	2019-04-17	2019-04-18	Highly Possible related	Recovery	No	No change
003	Diarrhea	1	2019-04-23	2019-04-23	Highly Possible related	Recovery	No	No change
003	Diarrhea	1	2019-04-26	2019-04-27	Highly Possible related	Recovery	No	No change
003	Diarrhea	1	2019-04-30	2019-04-30	Highly Possible related	Recovery	No	No change
003	Diarrhea	1	2019-05-04	2019-05-08	Highly Possible related	Recovery	No	No change
003	Diarrhea	1	2019-05-13	2019-05-25	Highly Possible related	Recovery	No	No change
003	Fatigue	1	2019-05-15	2019-05-22	Possible related	Recovery	No	No change
003	Diarrhea	1	2019-05-30	2019-05-30	Highly Possible related	Recovery	No	No change
003	Diarrhea	1	2019-06-03	2019-06-21	Highly Possible related	Recovery	No	No change
003	Diarrhea	1	2019-06-26	2019-06-26	Highly Possible related	Recovery	No	No change
003	Diarrhea	1	2019-06-28	2019-06-28	Highly Possible related	Recovery	No	No change
003	Cough	1	2019-07-01	2019-07-02	Possible no relation	Recovery	No	No change
003	Diarrhea	1	2019-07-03	2019-07-18	Highly Possible related	Recovery	No	No change
003	Diarrhea	1	2019-07-23	2019-08-08	Highly Possible related	Recovery	No	No change
003	Diarrhea	1	2019-08-11	2019-08-15	Highly Possible related	Recovery	No	No change
003	Diarrhea	1	2019-08-20	2019-08-20	Highly Possible related	Recovery	No	No change
003	Diarrhea	1	2019-08-24	2019-09-18	Highly Possible related	Recovery	No	No change
003	Diarrhea	1	2019-09-24	2019-09-24	Highly Possible related	Recovery	No	No change
003	Diarrhea	1	2019-09-30	2019-09-30	Highly Possible related	Recovery	No	No change
003	Diarrhea	1	2019-10-06	2019-10-14	Highly Possible related	Recovery	No	No change
003	Diarrhea	1	2019-10-20	2019-10-20	Highly Possible related	Recovery	No	No change
003	Diarrhea	1	2019-10-28	2019-11-02	Highly Possible related	Recovery	No	No change
004	Fatigue	2	2019-04-03	2019-05-07	Possible related	Recovery	No	No change
004	Diarrhea	1	2019-04-03	2019-04-15	Highly Possible related	Recovery	No	No change
004	Loss of appetite	1	2019-04-03	2019-04-14	Possible related	Recovery	No	No change
004	Abdominal distension	1	2019-04-03	2019-04-15	Possible related	Recovery	No	No change
004	Poor mental condition	1	2019-04-03	2019-04-10	Possible related	Recovery	No	No change
004	Diarrhea	2	2019-04-18	2019-04-19	Highly Possible related	Recovering	No	No change
004	Diarrhea	1	2019-04-20	2019-04-20	Highly Possible related	Deterioration of condition	No	No change
004	Hand-foot syndrome	2	2019-04-20	2019-07-23	Possible related	Recovery	No	No change
004	Diarrhea	2	2019-04-21	2019-04-22	Highly Possible related	Recovery	No	No change
004	Diarrhea	1	2019-04-30	2019-05-01	Highly Possible related	Deterioration of condition	No	No change
004	Diarrhea	2	2019-05-02	2019-05-02	Highly Possible related	Recovering	No	No change
004	Diarrhea	1	2019-05-03	2019-05-04	Highly Possible related	Recovery	No	No change
004	Hand-foot syndrome	1	2019-10-17	2020-02-14	Possible related	Recovery	No	No change
004	Hyperuricemia	1	2019-12-05		Possible related	Recovering	No	No change
005	Nausea	1	2019-04-13	2019-04-13	Possible related	Recovery	No	No change
005	Fatigue	1	2019-04-14	2019-04-29	Possible related	Recovery	No	No change
005	Diarrhea	1	2019-04-14	2019-04-17	Highly Possible related	Recovery	No	No change
005	Diarrhea	1	2019-04-20	2019-04-22	Highly Possible related	Recovery	No	No change
005	Oral mucositis	1	2019-04-20	2019-04-22	Possible related	Recovery	No	No change
005	Loss of appetite	1	2019-04-22	2019-04-22	Possible related	Recovery	No	No change
005	Diarrhea	1	2019-04-26	2019-04-26	Highly Possible related	Recovery	No	No change
005	Diarrhea	2	2019-04-30	2019-04-30	Highly Possible related	Recovery	No	No change
005	Hand-foot syndrome	1	2019-05-01	2019-05-05	Possible related	Recovery	No	No change
005	Diarrhea	1	2019-05-04	2019-05-05	Highly Possible related	Recovery	No	No change
005	Diarrhea	1	2019-05-13	2019-05-13	Highly Possible related	Recovery	No	No change
005	Hand-foot syndrome	1	2019-05-12	2019-05-17	Possible related	Recovery	No	No change
005	Diarrhea	1	2019-05-17	2019-05-17	Highly Possible related	Recovery	No	No change
005	Diarrhea	1	2019-06-19	2019-06-19	Highly Possible related	Recovery	No	No change
005	White blood cell count decreased	1	2019-06-27	2020-01-26	Possible related	Recovery	No	No change
005	Neutrophil count decreased	1	2019-06-27	2020-01-26	Possible related	Recovery	No	No change
005	Diarrhea	1	2019-07-02	2019-07-02	Highly Possible related	Recovery	No	No change
005	Diarrhea	1	2019-08-21	2019-08-21	Highly Possible related	Deterioration of condition	No	No change
005	Diarrhea	2	2019-08-22	2019-08-22	Highly Possible related	Recovery	No	No change
005	Diarrhea	1	2019-09-01	2019-09-01	Highly Possible related	Recovery	No	No change
005	Diarrhea	1	2019-10-30	2019-11-01	Highly Possible related	Recovery	No	No change
005	Diarrhea	1	2019-12-28	2019-12-28	Highly Possible related	Recovery	No	No change
006	Nausea	1	2019-04-14	2019-04-14	Possible related	Recovery	No	No change
006	Vomiting	1	2019-04-14	2019-04-14	Possible related	Recovery	No	No change
006	Diarrhea	1	2019-04-14	2019-04-20	Highly Possible related	Recovery	No	No change
006	Hand-foot syndrome	2	2019-04-14	2019-09-10	Possible related	Recovery	No	No change
006	Loss of appetite	1	2019-04-21	2019-04-23	Possible related	Recovery	No	No change
006	Diarrhea	1	2019-04-28	2019-05-04	Highly Possible related	Recovery	No	No change
006	Lymphocyte count decreased	1	2019-08-01	2019-11-25	Possible related	Recovery	No	No change
006	Hypocalcemia	1	2019-08-01	2019-11-25	Possible no relation	Recovery	No	No change
006	Anemia	1	2019-11-25		Possible no relation	No change	No	No change
007	Increased alanine aminotransferase	1	2019-04-17	2019-06-27	Not related	Recovery	No	No change
007	Decreased fibrinogen	1	2019-04-17		Not related	Recovery	No	No change
007	Fatigue	1	2019-04-22	2019-04-29	Possible related	Recovery	No	No change
007	Rash	1	2019-05-22	2019-06-06	Possible related	Recovery	No	No change
007	Lymphocyte count decreased	1	2019-06-27		Possible related	No change	No	No change
007	Hyperuricemia	1	2019-06-27		Possible related	No change	No	No change
008	Lymphocyte count decreased	1	2019-05-04	2019-08-01	Not related	Recovery	No	No change
008	Diarrhea	1	2019-05-09	2019-05-10	Highly Possible related	Recovering	No	No change
008	Diarrhea	2	2019-05-11	2019-05-11	Highly Possible related	Deterioration of condition	No	No change
008	Fatigue	1	2019-05-11	2019-05-14	Possible related	Recovery	No	No change
008	Vomiting	1	2019-05-13	2019-05-13	Possible related	Recovery	No	No change
008	Fatigue	1	2019-05-16	2019-05-18	Possible related	Recovery	No	No change
008	Nausea	1	2019-05-16	2019-05-18	Possible related	Recovery	No	No change
008	Vomiting	1	2019-05-16	2019-05-16	Possible related	Recovery	No	No change
008	Diarrhea	3	2019-05-12	2019-05-12	Highly Possible related	Deterioration of condition	No	No change
008	Diarrhea	2	2019-05-13	2019-05-13	Highly Possible related	Recovering	No	No change
008	Diarrhea	3	2019-05-14	2019-05-14	Highly Possible related	Deterioration of condition	No	No change
008	Diarrhea	2	2019-05-15	2019-05-15	Highly Possible related	Recovering	No	Interruption
008	Diarrhea	3	2019-05-16	2019-05-17	Highly Possible related	Deterioration of condition	No	No change
008	Diarrhea	2	2019-05-18	2019-05-18	Highly Possible related	Recovering	No	No change
008	Diarrhea	1	2019-05-19	2019-05-23	Highly Possible related	Recovering	No	No change
008	Nausea	1	2019-05-24	2019-05-29	Possible related	Recovery	No	No change
008	Diarrhea	2	2019-05-24	2019-05-26	Highly Possible related	Deterioration of condition	No	No change
008	Vomiting	1	2019-05-27	2019-05-27	Possible related	Recovery	No	No change
008	Diarrhea	3	2019-05-27	2019-05-27	Highly Possible related	Deterioration of condition	No	No change
008	Diarrhea	2	2019-05-28	2019-05-31	Highly Possible related	Recovering	No	No change
008	Diarrhea	1	2019-06-01	2019-06-01	Highly Possible related	Recovering	No	No change
008	Diarrhea	2	2019-06-02	2019-06-02	Highly Possible related	Deterioration of condition	No	No change
008	Nausea	1	2019-06-02	2019-06-03	Possible related	Recovery	No	No change
008	Diarrhea	1	2019-06-03	2019-06-04	Highly Possible related	Deterioration of condition	No	No change
008	Diarrhea	2	2019-06-05	2019-06-05	Highly Possible related	Deterioration of condition	No	No change
008	Diarrhea	1	2019-06-06	2019-06-06	Highly Possible related	Recovery	No	No change
008	Diarrhea	1	2019-06-10	2019-06-26	Highly Possible related	Deterioration of condition	No	No change
008	Diarrhea	2	2019-06-27	2019-06-27	Highly Possible related	Recovering	No	No change
008	Diarrhea	1	2019-06-28	2019-06-28	Highly Possible related	Recovery	No	No change
008	Fatigue	1	2019-07-04	2019-07-04	Possible related	Recovery	No	No change
008	Fatigue	1	2019-07-12	2019-07-16	Possible related	Recovery	No	No change
008	Dizziness	1	2019-07-13	2019-07-15	Possible related	Recovery	No	No change
008	Headache	1	2019-07-18	2019-07-20	Possible related	Recovery	No	No change
008	Dizziness	1	2019-07-21	2019-07-22	Possible related	Recovery	No	No change
008	Nausea	1	2019-08-02	2019-08-03	Possible related	Recovery	No	No change
008	Dizziness	1	2019-08-04	2019-08-04	Possible related	Recovery	No	No change
008	Diarrhea	1	2019-08-20	2019-08-22	Highly Possible related	Deterioration of condition	No	No change
008	Diarrhea	2	2019-08-23	2019-08-23	Highly Possible related	Recovering	No	No change
008	Diarrhea	1	2019-08-24	2019-08-24	Highly Possible related	Recovery	No	No change
008	Diarrhea	1	2019-09-01	2019-09-01	Highly Possible related	Recovery	No	No change
008	Diarrhea	1	2019-09-13	2019-09-13	Highly Possible related	Deterioration of condition	No	No change
008	Diarrhea	2	2019-09-14	2019-09-14	Highly Possible related	Recovery	No	No change
008	Diarrhea	1	2019-09-16	2019-09-18	Highly Possible related	Recovery	No	No change
008	Diarrhea	1	2019-10-01	2019-10-01	Highly Possible related	Deterioration of condition	No	No change
008	Diarrhea	2	2019-10-02	2019-10-02	Highly Possible related	Recovery	No	No change
008	Diarrhea	3	2019-10-03	2019-10-03	Highly Possible related	Deterioration of condition	No	No change
008	Diarrhea	2	2019-10-04	2019-10-04	Highly Possible related	Recovering	No	No change
008	Diarrhea	1	2019-10-05	2019-10-05	Highly Possible related	Deterioration of condition	No	No change
008	Diarrhea	2	2019-10-06	2019-10-06	Highly Possible related	Recovering	No	No change
008	Diarrhea	1	2019-10-07	2019-10-07	Highly Possible related	Recovery	No	No change
008	Diarrhea	1	2019-10-11	2019-10-11	Highly Possible related	Deterioration of condition	No	No change
008	Diarrhea	2	2019-10-12	2019-10-12	Highly Possible related	Recovery	No	No change
008	Diarrhea	1	2019-11-30	2019-11-30	Highly Possible related	Deterioration of condition	No	No change
008	Diarrhea	2	2019-12-01	2019-12-01	Highly Possible related	Recovery	No	No change
008	Anemia	1	2020-01-22	2020-04-27	Possible no relation	Recovery	No	No change
009	Lymphocyte count decreased	1	2019-05-07	2019-10-31	Not related	Recovering	No	No change
009	Diarrhea	1	2019-05-22	2019-05-22	Highly Possible related	Deterioration of condition	No	No change
009	Diarrhea	2	2019-05-23	2019-05-23	Highly Possible related	Recovering	No	No change
009	Diarrhea	1	2019-05-24	2019-05-26	Highly Possible related	Deterioration of condition	No	No change
009	Nausea	1	2019-05-26	2019-05-26	Highly Possible related	Recovery	No	No change
009	Vomiting	1	2019-05-27	2019-05-27	Highly Possible related	Recovery	No	No change
009	Diarrhea	2	2019-05-27	2019-05-27	Highly Possible related	Recovering	No	No change
009	Oral mucositis	2	2019-05-27	2019-06-01	Possible related	Recovery	No	No change
009	Facial acne	2	2019-05-27	2019-06-17	Possible related	Recovery	No	No change
009	Diarrhea	1	2019-05-28	2019-05-28	Highly Possible related	Deterioration of condition	No	No change
009	Diarrhea	2	2019-05-29	2019-05-29	Highly Possible related	Recovering	No	No change
009	Vomiting	1	2019-05-30	2019-05-30	Possible related	Deterioration of condition	No	No change
009	Diarrhea	1	2019-05-30	2019-05-30	Highly Possible related	Deterioration of condition	No	No change
009	Diarrhea	2	2019-05-31	2019-05-31	Highly Possible related	Recovering	No	No change
009	Diarrhea	1	2019-06-01	2019-06-03	Highly Possible related	Recovery	No	No change
009	Vomiting	1	2019-06-05	2019-06-05	Highly Possible related	Recovery	No	No change
009	Fatigue	1	2019-06-05	2019-06-05	Possible related	Recovery	No	No change
009	Diarrhea	1	2019-06-09	2019-06-10	Highly Possible related	Recovery	No	No change
009	Diarrhea	1	2019-06-15	2019-06-15	Highly Possible related	Recovery	No	No change
009	Diarrhea	1	2019-06-19	2019-06-23	Highly Possible related	Recovery	No	No change
009	Diarrhea	1	2019-07-02	2019-07-02	Highly Possible related	Recovery	No	No change
009	Diarrhea	1	2019-07-08	2019-07-08	Highly Possible related	Recovery	No	No change
009	Diarrhea	1	2019-07-14	2019-07-14	Highly Possible related	Recovery	No	No change
009	Diarrhea	1	2019-07-16	2019-07-18	Highly Possible related	Recovery	No	No change
009	Diarrhea	1	2019-07-22	2019-07-25	Highly Possible related	Recovery	No	No change
009	胸闷气短	1	2019-07-22	2019-07-23	Possible no relation	Recovery	No	No change
009	Nausea	1	2019-07-23	2019-07-23	Highly Possible related	Recovery	No	No change
009	Diarrhea	1	2019-08-02	2019-08-03	Highly Possible related	Recovery	No	No change
009	Diarrhea	1	2019-08-06	2019-08-06	Highly Possible related	Recovery	No	No change
009	Diarrhea	1	2019-08-10	2019-08-10	Highly Possible related	Recovery	No	No change
009	Diarrhea	1	2019-08-14	2019-08-14	Highly Possible related	Recovery	No	No change
009	Diarrhea	1	2019-08-17	2019-08-17	Highly Possible related	Recovery	No	No change
009	Diarrhea	1	2019-08-22	2019-08-23	Highly Possible related	Recovery	No	No change
009	Diarrhea	1	2019-08-26	2019-08-29	Highly Possible related	Recovery	No	No change
009	Diarrhea	1	2019-09-03	2019-09-06	Highly Possible related	Recovery	No	No change
009	Diarrhea	1	2019-09-11	2019-09-12	Highly Possible related	Recovery	No	No change
009	Diarrhea	1	2019-09-15	2019-09-16	Highly Possible related	Recovery	No	No change
009	Hand-foot syndrome	1	2019-09-18	2019-10-06	Possible related	Recovery	No	No change
009	Diarrhea	1	2019-09-21	2019-09-22	Highly Possible related	Recovery	No	No change
009	Diarrhea	1	2019-09-27	2019-09-27	Highly Possible related	Recovery	No	No change
009	Diarrhea	1	2019-10-01	2019-10-01	Highly Possible related	Recovery	No	No change
009	Diarrhea	1	2019-10-06	2019-10-08	Highly Possible related	Recovery	No	No change
010	White blood cell count decreased	2	2019-05-17	2019-08-09	Not related	Recovering	No	No change
010	Neutrophil count decreased	1	2019-05-17	2019-08-09	Not related	Recovery	No	No change
010	Lymphocyte count decreased	1	2019-05-17		Not related	No change	No	No change
010	Fatigue	1	2019-05-25	2019-05-25	Possible related	Recovery	No	No change
010	Diarrhea	1	2019-05-29	2019-05-29	Highly Possible related	Recovery	No	No change
010	Diarrhea	2	2019-06-01	2019-06-02	Highly Possible related	Recovering	No	No change
010	Diarrhea	1	2019-06-03	2019-06-06	Highly Possible related	Recovery	No	No change
010	Diarrhea	1	2019-06-09	2019-06-12	Highly Possible related	Recovery	No	No change
010	Fatigue	1	2019-07-13	2019-07-15	Possible related	Recovery	No	No change
010	Nausea	1	2019-07-13	2019-07-13	Possible related	Recovery	No	No change
010	Vomiting	1	2019-07-13	2019-07-13	Possible related	Recovery	No	No change
010	Diarrhea	3	2019-07-13	2019-07-15	Highly Possible related	Recovery	No	No change
010	Diarrhea	3	2019-07-26	2019-07-26	Highly Possible related	Recovering	No	No change
010	Diarrhea	2	2019-07-27	2019-07-27	Highly Possible related	Recovery	No	No change
010	White blood cell count decreased	1	2019-08-09	2019-11-12	Possible related	Recovery	No	No change
010	Diarrhea	1	2019-10-21	2019-10-23	Highly Possible related	Recovery	No	No change
011	White blood cell count decreased	1	2019-05-23	2019-08-08	Not related	Recovery	No	No change
011	Lymphocyte count decreased	1	2019-05-23	2019-11-14	Not related	Recovery	No	No change
011	Decreased fibrinogen	1	2019-05-23	2019-11-14	Not related	Recovery	No	No change
011	Diarrhea	1	2019-05-25	2019-05-25	Highly Possible related	Deterioration of condition	No	No change
011	Diarrhea	2	2019-05-26	2019-05-28	Highly Possible related	Recovering	No	No change
011	Diarrhea	1	2019-05-29	2019-06-03	Highly Possible related	Deterioration of condition	No	No change
011	Diarrhea	2	2019-06-04	2019-06-04	Highly Possible related	Recovering	No	No change
011	Diarrhea	1	2019-06-15	2019-06-17	Highly Possible related	Deterioration of condition	No	No change
011	Diarrhea	2	2019-06-18	2019-06-18	Highly Possible related	Recovery	No	No change
011	Diarrhea	1	2019-06-20	2019-06-21	Highly Possible related	Recovery	No	No change
011	Anemia	1	2019-08-08	2019-11-14	Possible related	Recovery	No	No change
011	Diarrhea	1	2019-10-03	2019-10-03	Highly Possible related	Recovery	No	No change
011	Hypophosphatemia	1	2020-02-27	2020-06-04	Possible no relation	Recovery	No	No change
011	Hand-foot syndrome	1	2020-03-10	2020-05-08	Possible related	Recovery	No	No change
011	White blood cell count decreased	1	2020-06-04		Possible related	Recovering	No	No change
011	Neutrophil count decreased	1	2020-06-04		Possible related	Recovering	No	No change
011	Lymphocyte count decreased	1	2020-06-04		Possible related	Recovering	No	No change
012	Nausea	1	2019-05-29	2019-05-29	Possible related	Recovering	No	No change
012	Diarrhea	1	2019-05-30	2019-06-22	Highly Possible related	Deterioration of condition	No	No change
012	Fatigue	1	2019-06-01	2019-06-01	Possible related	Recovery	No	No change
012	Fatigue	1	2019-06-03	2019-06-06	Possible related	Recovery	No	No change
012	Fatigue	1	2019-06-08	2019-06-16	Possible related	Recovery	No	No change
012	Fatigue	1	2019-06-18	2019-06-20	Possible related	Recovery	No	No change
012	Diarrhea	2	2019-06-23	2019-06-23	Highly Possible related	Recovering	No	No change
012	Fatigue	1	2019-06-23	2019-06-24	Possible related	Recovery	No	No change
012	Diarrhea	1	2019-06-24	2019-06-28	Highly Possible related	Recovery	No	No change
012	Hand-foot syndrome	1	2019-06-28	2019-07-01	Possible related	Recovery	No	No change
012	Fatigue	1	2019-06-28	2019-06-28	Possible related	Recovery	No	No change
012	Fatigue	1	2019-07-01	2019-07-04	Possible related	Recovery	No	No change
012	Diarrhea	1	2019-07-01	2019-07-04	Highly Possible related	Recovery	No	No change
012	Diarrhea	1	2019-07-07	2019-07-07	Highly Possible related	Recovery	No	No change
012	Diarrhea	1	2019-07-12	2019-07-14	Highly Possible related	Recovery	No	No change
012	Fatigue	1	2019-07-12	2019-07-14	Possible related	Recovery	No	No change
012	Diarrhea	1	2019-07-18	2019-07-19	Highly Possible related	Recovery	No	No change
012	Fatigue	1	2019-07-18	2019-07-27	Possible related	Recovery	No	No change
012	Insomnia	1	2019-07-20	2019-07-20	Possible no relation	Recovery	No	No change
012	Headache	1	2019-07-20	2019-07-21	Possible related	Recovery	No	No change
012	Nausea	1	2019-07-20	2019-07-27	Possible related	Recovery	No	No change
012	Diarrhea	2	2019-07-22	2019-07-22	Highly Possible related	Recovery	No	No change
012	胸闷	1	2019-07-22	2019-07-22	Possible no relation	Recovery	No	No change
012	Headache	1	2019-07-23	2019-07-27	Possible related	Recovery	No	No change
012	Nausea	1	2019-07-23	2019-07-27	Possible related	Recovery	No	No change
012	Diarrhea	2	2019-07-27	2019-07-27	Highly Possible related	Recovery	No	No change
012	Fatigue	1	2019-07-31	2019-08-03	Possible related	Recovery	No	No change
012	Diarrhea	2	2019-07-31	2019-07-31	Highly Possible related	Recovery	No	No change
012	Nausea	1	2019-07-31	2019-07-31	Possible related	Recovery	No	No change
012	Diarrhea	1	2019-08-01	2019-08-01	Highly Possible related	Recovery	No	No change
012	Diarrhea	1	2019-08-04	2019-08-04	Highly Possible related	Recovery	No	No change
012	Myalgia	1	2019-08-08	2019-08-12	Possible no relation	Recovery	No	No change
012	Fatigue	1	2019-08-08	2019-08-11	Possible related	Recovery	No	No change
012	Nausea	1	2019-08-08	2019-08-09	Possible related	Recovery	No	No change
012	Headache	1	2019-08-08	2019-08-12	Possible related	Recovery	No	No change
012	Diarrhea	1	2019-08-11	2019-08-12	Highly Possible related	Recovery	No	No change
012	Nausea	1	2019-08-12	2019-08-12	Possible related	Recovery	No	No change
012	Lymphocyte count decreased	1	2019-08-15	2019-11-19	Possible related	Recovery	No	Interruption
012	Diarrhea	1	2019-08-22	2019-08-22	Highly Possible related	Deterioration of condition	No	No change
012	Diarrhea	2	2019-08-23	2019-08-23	Highly Possible related	Recovering	No	No change
012	Diarrhea	2	2019-08-24	2019-08-24	Highly Possible related	Recovery	No	No change
012	Fatigue	1	2019-08-24	2019-08-25	Possible related	Recovery	No	No change
012	Nausea	1	2019-08-24	2019-08-25	Possible related	Recovery	No	No change
012	Nausea	1	2019-08-27	2019-08-29	Possible related	Recovery	No	No change
012	Fatigue	1	2019-08-28	2019-08-29	Possible related	Recovery	No	No change
012	Fatigue	1	2019-09-04	2019-09-06	Possible related	Recovery	No	No change
012	Nausea	1	2019-09-10	2019-09-10	Possible related	Recovery	No	No change
012	Diarrhea	1	2019-09-10	2019-09-12	Highly Possible related	Recovery	No	No change
012	Nausea	1	2019-09-15	2019-09-15	Possible related	Recovery	No	No change
012	Diarrhea	1	2019-09-15	2019-09-20	Highly Possible related	Recovery	No	No change
012	Fatigue	1	2019-09-16	2019-09-16	Possible related	Recovery	No	No change
012	Nausea	1	2019-09-17	2019-09-18	Possible related	Recovery	No	No change
012	Diarrhea	1	2019-09-24	2019-09-28	Highly Possible related	Recovery	No	No change
012	Diarrhea	1	2019-10-04	2019-10-05	Highly Possible related	Deterioration of condition	No	No change
012	Diarrhea	2	2019-10-06	2019-10-06	Highly Possible related	Recovery	No	No change
012	Diarrhea	1	2019-10-11	2019-10-12	Highly Possible related	Recovery	No	No change
012	Diarrhea	1	2019-10-17	2019-10-19	Highly Possible related	Recovery	No	No change
012	Nausea	1	2019-10-17	2019-10-18	Possible related	Recovery	No	No change
012	Diarrhea	1	2019-10-28	2019-10-29	Highly Possible related	Recovery	No	No change
012	Nausea	1	2019-10-30	2019-10-30	Possible related	Recovery	No	No change
012	Diarrhea	1	2019-11-04	2019-11-04	Highly Possible related	Recovery	No	No change
012	高钙血症	1	2019-11-14	2020-02-01	Possible no relation	Recovery	No	No change
012	全身酸痛	1	2019-11-21	2019-11-22	Possible related	Recovery	No	No change
012	Fatigue	1	2019-11-21	2019-11-23	Possible related	Recovery	No	No change
012	Nausea	1	2019-11-21	2019-11-22	Possible related	Recovery	No	No change
012	Fatigue	1	2019-11-25	2019-11-26	Possible related	Recovery	No	No change
012	Nausea	1	2019-11-27	2019-11-27	Possible related	Recovery	No	No change
012	Insomnia	1	2019-12-01	2019-12-04	Possible related	Recovery	No	No change
012	Nausea	1	2019-12-27	2019-12-29	Possible related	Recovery	No	No change
012	Oral mucositis	2	2020-02-03	2020-02-23	Possible related	Recovery	No	Interruption
012	Periodontal disease	1	2020-02-26	2020-02-29	Possible related	Recovery	No	No change
012	Periodontal disease	2	2020-03-06	2020-03-16	Possible no relation	Recovering	No	Interruption
013	Diarrhea	2	2019-06-22	2019-06-22	Highly Possible related	Recovering	No	No change
013	Diarrhea	1	2019-06-23	2019-06-23	Highly Possible related	Recovery	No	No change
013	Headache	1	2019-06-24	2019-07-12	Possible related	Recovery	No	No change
013	Headache	1	2019-07-14	2019-07-16	Possible related	Recovery	No	No change
013	Diarrhea	2	2019-06-26	2019-06-26	Highly Possible related	Recovery	No	No change
013	Diarrhea	3	2019-08-26	2019-08-26	Highly Possible related	Recovery	No	No change
013	Increased creatinine	1	2019-09-04	2020-01-03	Possible no relation	Recovery	No	No change
013	Hyperuricemia	1	2019-09-04	2020-01-03	Possible related	Recovery	No	No change
014	Diarrhea	1	2019-06-19	2019-06-23	Highly Possible related	Deterioration of condition	No	No change
014	Dizziness	1	2019-06-21	2019-06-21	Possible related	Recovery	No	No change
014	Hand-foot syndrome	1	2019-06-20	2019-06-20	Possible related	Recovery	No	No change
014	视力模糊	1	2019-06-22	2019-06-22	Possible no relation	Recovery	No	No change
014	Dizziness	1	2019-06-23	2019-06-27	Possible related	Recovery	No	No change
014	Diarrhea	2	2019-06-24	2019-06-24	Highly Possible related	Recovering	No	No change
014	Diarrhea	1	2019-06-25	2019-07-09	Highly Possible related	Deterioration of condition	No	No change
014	Dizziness	1	2019-06-25	2019-06-25	Possible related	Deterioration of condition	No	No change
014	Nausea	1	2019-06-25	2019-06-27	Possible related	Deterioration of condition	No	No change
014	Vomiting	1	2019-06-25	2019-06-25	Possible related	Deterioration of condition	No	No change
014	Hand-foot syndrome	2	2019-06-27	2019-07-04	Possible related	Recovery	No	No change
014	Dizziness	1	2019-06-29	2019-06-30	Possible related	Recovery	No	No change
014	Fatigue	1	2019-07-01	2019-07-15	Possible related	Recovery	No	No change
014	Vomiting	1	2019-07-03	2019-07-03	Possible related	Recovery	No	No change
014	Dizziness	1	2019-07-02	2019-07-15	Possible related	Recovery	No	No change
014	Headache	1	2019-07-08	2019-07-08	Possible related	Recovery	No	No change
014	Hand-foot syndrome	2	2019-07-09	2019-07-11	Possible related	Recovering	No	No change
014	Diarrhea	2	2019-07-10	2019-07-10	Highly Possible related	Recovering	No	No change
014	Diarrhea	1	2019-07-11	2019-07-15	Highly Possible related	Deterioration of condition	No	No change
014	Nausea	1	2019-07-14	2019-07-14	Possible related	Recovery	No	No change
014	Diarrhea	2	2019-07-16	2019-07-17	Highly Possible related	Deterioration of condition	No	No change
014	Dizziness	1	2019-07-17	2019-07-29	Possible related	Deterioration of condition	No	No change
014	Diarrhea	1	2019-07-18	2019-07-21	Highly Possible related	Deterioration of condition	No	No change
014	Diarrhea	2	2019-07-22	2019-07-23	Highly Possible related	Recovering	No	No change
014	Nausea	1	2019-07-23	2019-07-23	Possible related	Recovery	No	No change
014	Diarrhea	1	2019-07-24	2019-07-25	Highly Possible related	Deterioration of condition	No	No change
014	Nausea	1	2019-07-25	2019-08-01	Possible related	Recovery	No	No change
014	Diarrhea	2	2019-07-26	2019-07-28	Highly Possible related	Recovering	No	No change
014	Headache	1	2019-07-26	2019-07-26	Possible related	Recovery	No	No change
014	Diarrhea	1	2019-07-29	2019-07-29	Highly Possible related	Deterioration of condition	No	No change
014	Diarrhea	2	2019-07-30	2019-07-31	Highly Possible related	Recovering	No	No change
014	Diarrhea	1	2019-08-01	2019-08-01	Highly Possible related	Deterioration of condition	No	No change
014	Diarrhea	2	2019-08-02	2019-08-02	Highly Possible related	Recovering	No	No change
014	Diarrhea	1	2019-08-03	2019-08-05	Highly Possible related	Deterioration of condition	No	No change
014	Diarrhea	2	2019-08-06	2019-08-07	Highly Possible related	Recovering	No	No change
014	Dizziness	1	2019-08-07	2019-08-13	Possible related	Recovery	No	No change
014	Nausea	1	2019-08-07	2019-08-08	Possible related	Recovery	No	No change
014	Diarrhea	1	2019-08-08	2019-08-18	Highly Possible related	Deterioration of condition	No	No change
014	Diarrhea	2	2019-08-19	2019-08-19	Highly Possible related	Recovering	No	No change
014	Tooth pain	2	2019-08-19	2019-08-21	Possible no relation	Recovery	No	No change
014	Diarrhea	1	2019-08-20	2019-08-25	Highly Possible related	Recovering	No	No change
014	Diarrhea	2	2019-08-26	2019-08-27	Highly Possible related	Deterioration of condition	No	No change
014	Nausea	1	2019-08-26	2019-08-27	Possible related	Recovery	No	No change
014	Hand-foot syndrome	1	2019-08-27	2019-09-08	Possible related	Recovery	No	No change
014	Diarrhea	1	2019-08-28	2019-08-30	Highly Possible related	Deterioration of condition	No	No change
014	Diarrhea	2	2019-08-31	2019-08-31	Highly Possible related	Deterioration of condition	No	No change
014	Diarrhea	3	2019-09-01	2019-09-02	Highly Possible related	Recovering	No	No change
014	Muscle cramps	1	2019-09-01	2019-09-01	Possible no relation	Recovery	No	No change
014	Dizziness	1	2019-09-02	2019-09-02	Possible related	Recovery	No	No change
014	Nausea	1	2019-09-02	2019-09-02	Possible related	Recovery	No	No change
014	Diarrhea	1	2019-09-03	2019-09-11	Highly Possible related	Recovery	No	No change
014	Diarrhea	1	2019-09-13	2019-09-13	Highly Possible related	Deterioration of condition	No	No change
014	Hypoalbuminemia	1	2019-09-04		Possible no relation	Recovering	No	No change
014	Anemia	1	2019-09-04		Possible no relation	Recovering	No	No change
014	Muscle cramps	1	2019-09-05	2019-09-05	Possible no relation	Recovery	No	No change
014	Dizziness	1	2019-09-10	2019-09-11	Possible related	Recovery	No	No change
014	Muscle cramps	1	2019-09-14	2019-09-15	Possible no relation	Recovery	No	No change
014	Dizziness	1	2019-09-14	2019-09-15	Possible related	Recovery	No	No change
014	Diarrhea	2	2019-09-14	2019-09-14	Highly Possible related	Recovering	No	No change
014	Diarrhea	1	2019-09-15	2019-09-16	Highly Possible related	Deterioration of condition	No	No change
014	Hand-foot syndrome	1	2019-09-15	2019-09-15	Possible related	Recovering	No	No change
014	Diarrhea	2	2019-09-17	2019-09-17	Highly Possible related	Recovering	No	No change
014	Diarrhea	1	2019-09-18	2019-09-19	Highly Possible related	Deterioration of condition	No	No change
014	Diarrhea	2	2019-09-20	2019-09-20	Highly Possible related	Recovering	No	No change
014	Diarrhea	1	2019-09-21	2019-09-21	Highly Possible related	Deterioration of condition	No	No change
014	Diarrhea	2	2019-09-22	2019-09-22	Highly Possible related	Recovering	No	No change
014	Diarrhea	1	2019-09-23	2019-09-28	Highly Possible related	Deterioration of condition	No	No change
014	Muscle cramps	1	2019-09-24	2019-09-24	Possible no relation	Recovery	No	No change
014	Dizziness	1	2019-09-25	2019-09-26	Possible related	Recovery	No	No change
014	Diarrhea	2	2019-09-29	2019-09-29	Highly Possible related	Recovering	No	No change
014	Hand-foot syndrome	1	2019-09-29	2019-09-29	Possible related	Recovering	No	No change
014	Hand-foot syndrome	1	2019-10-02	2019-10-08	Possible related	Recovery	No	No change
014	Diarrhea	1	2019-09-30	2019-10-01	Highly Possible related	Deterioration of condition	No	No change
014	Tooth pain	1	2019-09-30	2019-10-04	Possible no relation	Recovery	No	No change
014	Diarrhea	2	2019-10-02	2019-10-02	Highly Possible related	Recovering	No	No change
014	Headache	1	2019-10-01	2019-10-01	Possible related	Recovery	No	No change
014	Nausea	1	2019-10-01	2019-10-01	Possible related	Recovering	No	No change
014	Diarrhea	1	2019-10-03	2019-10-06	Highly Possible related	Deterioration of condition	No	No change
014	Diarrhea	2	2019-10-07	2019-10-09	Highly Possible related	Recovering	No	No change
014	Diarrhea	1	2019-10-11	2019-10-11	Highly Possible related	Recovery	No	No change
015	Hyperuricemia	1	2019-06-18	2019-09-12	Not related	Recovering	No	No change
015	Anemia	1	2019-06-18	2019-09-11	Not related	Deterioration of condition	No	No change
015	Diarrhea	2	2019-07-01	2019-07-02	Highly Possible related	Deterioration of condition	No	No change
015	Diarrhea	3	2019-07-03	2019-07-03	Highly Possible related	Recovering	No	No change
015	Diarrhea	2	2019-07-04	2019-07-06	Highly Possible related	Recovery	No	No change
015	Diarrhea	2	2019-07-08	2019-07-08	Highly Possible related	Recovering	No	No change
015	Diarrhea	1	2019-07-09	2019-07-10	Highly Possible related	Deterioration of condition	No	No change
015	Diarrhea	2	2019-07-11	2019-07-11	Highly Possible related	Recovering	No	No change
015	Diarrhea	1	2019-07-12	2019-07-12	Highly Possible related	Deterioration of condition	No	No change
015	Diarrhea	2	2019-07-13	2019-07-14	Highly Possible related	Recovery	No	No change
015	Diarrhea	1	2019-07-15	2019-07-15	Highly Possible related	Deterioration of condition	No	No change
015	Diarrhea	2	2019-07-16	2019-07-16	Highly Possible related	Recovering	No	No change
015	Diarrhea	1	2019-07-17	2019-07-18	Highly Possible related	Deterioration of condition	No	No change
015	Diarrhea	2	2019-07-19	2019-07-19	Highly Possible related	Recovering	No	No change
015	Diarrhea	1	2019-07-20	2019-07-26	Highly Possible related	Deterioration of condition	No	No change
015	Diarrhea	2	2019-07-27	2019-07-27	Highly Possible related	Recovering	No	No change
015	Diarrhea	1	2019-07-28	2019-08-18	Highly Possible related	Deterioration of condition	No	No change
015	Diarrhea	2	2019-08-19	2019-08-19	Highly Possible related	Recovering	No	No change
015	Diarrhea	1	2019-08-20	2019-08-21	Highly Possible related	Deterioration of condition	No	No change
015	Diarrhea	2	2019-08-22	2019-08-23	Highly Possible related	Recovering	No	No change
015	Diarrhea	1	2019-08-24	2019-08-25	Highly Possible related	Deterioration of condition	No	No change
015	Diarrhea	2	2019-08-26	2019-08-26	Highly Possible related	Recovering	No	No change
015	Diarrhea	1	2019-08-27	2019-08-30	Highly Possible related	Deterioration of condition	No	No change
015	Diarrhea	2	2019-08-31	2019-09-01	Highly Possible related	Recovering	No	No change
015	Diarrhea	1	2019-09-02	2019-09-21	Highly Possible related	Deterioration of condition	No	No change
015	Diarrhea	2	2019-09-22	2019-09-22	Highly Possible related	Recovering	No	No change
015	Diarrhea	1	2019-09-23	2019-10-20	Highly Possible related	Recovery	No	No change
015	Anemia	2	2019-09-12		Possible no relation	Recovering	No	No change
015	Rash	1	2019-11-12		Possible related	Recovering	No	No change
016	Hyperglycemia	1	2019-06-20	2019-09-23	Not related	Recovery	No	No change
016	Diarrhea	1	2019-07-07	2019-07-07	Highly Possible related	Deterioration of condition	No	No change
016	Diarrhea	2	2019-07-08	2019-07-08	Highly Possible related	Recovering	No	No change
016	Diarrhea	1	2019-07-09	2019-07-10	Highly Possible related	Deterioration of condition	No	No change
016	Diarrhea	2	2019-07-11	2019-07-11	Highly Possible related	Recovering	No	No change
016	Diarrhea	1	2019-07-12	2019-07-12	Highly Possible related	Deterioration of condition	No	No change
016	Diarrhea	2	2019-07-13	2019-07-13	Highly Possible related	Recovering	No	No change
016	Nausea	1	2019-07-09	2019-07-15	Possible related	Recovery	No	No change
016	Vomiting	1	2019-07-07	2019-07-12	Possible related	Recovery	No	No change
016	Nausea	1	2019-07-10	2019-07-15	Possible related	Recovery	No	No change
016	Vomiting	1	2019-07-11	2019-07-12	Possible related	Recovery	No	No change
016	Mouth ulcer	2	2019-07-14	2019-07-18	Possible related	Recovery	No	Interruption
016	Fatigue	1	2019-07-14	2019-07-14	Possible related	Recovery	No	Interruption
016	Dizziness	1	2019-07-14	2019-07-14	Possible related	Recovery	No	Interruption
016	Fatigue	1	2019-08-04	2019-08-31	Possible related	Deterioration of condition	No	No change
016	Fatigue	2	2019-09-01	2019-09-28	Possible related	Recovery	No	No change
016	Diarrhea	3	2019-09-08	2019-09-08	Highly Possible related	Recovery	No	No change
016	Lymphocyte count decreased	1	2019-09-23		Possible related	Recovering	No	No change
016	Otitis media	2	2019-11-25	2020-01-13	Possible no relation	Recovery	No	No change
017	Diarrhea	1	2019-06-23	2019-07-04	Highly Possible related	Deterioration of condition	No	No change
017	Dizziness	1	2019-06-24	2019-06-25	Possible related	Recovery	No	Interruption
017	Diarrhea	2	2019-07-05	2019-07-05	Highly Possible related	Recovering	No	No change
017	Diarrhea	1	2019-07-06	2019-07-17	Highly Possible related	Recovery	No	No change
017	Diarrhea	1	2019-07-26	2019-07-27	Highly Possible related	Deterioration of condition	No	No change
017	Diarrhea	2	2019-07-28	2019-07-28	Highly Possible related	Recovering	No	No change
017	Diarrhea	1	2019-07-29	2019-08-02	Highly Possible related	Deterioration of condition	No	No change
017	Diarrhea	2	2019-08-03	2019-08-03	Highly Possible related	Recovery	No	No change
017	Diarrhea	1	2019-08-09	2019-08-12	Highly Possible related	Deterioration of condition	No	No change
017	Diarrhea	2	2019-08-13	2019-08-13	Highly Possible related	Recovering	No	No change
017	Diarrhea	1	2019-08-14	2019-08-14	Highly Possible related	Deterioration of condition	No	No change
017	Diarrhea	2	2019-08-15	2019-08-16	Highly Possible related	Recovering	No	No change
017	Diarrhea	1	2019-08-17	2019-08-17	Highly Possible related	Recovery	No	No change
017	Diarrhea	1	2019-08-21	2019-08-22	Highly Possible related	Recovery	No	No change
017	Diarrhea	1	2019-09-04	2019-09-04	Highly Possible related	Recovery	No	No change
017	Diarrhea	2	2019-09-17	2019-09-17	Highly Possible related	Recovery	No	No change
017	甲沟炎	2	2019-09-23	2019-09-25	Possible no relation	Recovery	No	No change
017	Diarrhea	1	2019-10-02	2019-10-02	Highly Possible related	Recovery	No	No change
017	Diarrhea	1	2019-10-08	2019-10-08	Highly Possible related	Recovery	No	No change
017	Diarrhea	1	2019-10-18	2019-10-18	Highly Possible related	Recovery	No	No change
017	Diarrhea	1	2019-11-05	2019-11-06	Highly Possible related	Recovery	No	No change
017	Diarrhea	1	2019-12-07	2019-12-07	Highly Possible related	Recovery	No	No change
017	Diarrhea	1	2019-12-12	2019-12-12	Highly Possible related	Recovery	No	No change
017	Diarrhea	1	2019-12-21	2019-12-21	Highly Possible related	Recovery	No	No change
017	Diarrhea	1	2019-12-27	2019-12-30	Highly Possible related	Recovery	No	No change
017	Diarrhea	1	2020-01-03	2020-01-03	Highly Possible related	Recovery	No	No change
017	Lymphocyte count decreased	1	2020-01-09	2020-04-09	Possible related	Recovery	No	No change
017	Diarrhea	1	2020-01-30	2020-01-30	Highly Possible related	Recovery	No	No change
017	Diarrhea	1	2020-02-14	2020-02-14	Highly Possible related	Deterioration of condition	No	No change
017	Diarrhea	2	2020-02-15	2020-02-16	Highly Possible related	Recovery	No	No change
017	Diarrhea	1	2020-02-21	2020-03-10	Highly Possible related	Recovery	No	No change
017	Diarrhea	1	2020-03-16	2020-04-03	Highly Possible related	Recovery	No	No change
017	Diarrhea	1	2020-04-06	2020-04-10	Highly Possible related	Recovery	No	No change
017	Diarrhea	1	2020-05-13	2020-05-17	Highly Possible related	Recovery	No	No change
017	Fatigue	1	2020-05-20	2020-05-21	Possible related	Recovery	No	No change
017	Diarrhea	1	2020-05-29	2020-06-17	Highly Possible related	Recovery	No	No change
017	Diarrhea	1	2020-06-20	2020-06-28	Highly Possible related	Recovery	No	No change
017	Increased alkaline phosphatase	1	2019-06-19	2020-07-23	Possible related	Recovery	No	No change
017	Diarrhea	1	2020-07-02	2020-07-05	Highly Possible related	Recovery	No	No change
018	Diarrhea	3	2019-07-06	2019-07-09	Highly Possible related	Recovery	No	Interruption
018	Fatigue	2	2019-07-06	2019-07-18	Possible related	Recovery	No	No change
018	Vomiting	2	2019-07-11	2019-07-16	Possible related	Recovery	No	Discontinuation
020	White blood cell count decreased	2	2019-07-08	2019-01-02	Possible related	Recovering	No	No change
020	White blood cell count decreased	1	2019-01-03	2019-03-29	Possible related	Deterioration of condition	No	No change
020	White blood cell count decreased	2	2019-03-30	2020-07-13	Possible related	Recovery	No	No change
020	Lymphocyte count decreased	1	2019-07-08	2020-09-22	Possible related	Deterioration of condition	No	No change
020	Lymphocyte count decreased	2	2019-09-23	2020-07-12	Possible related	Recovering	No	No change
020	Lymphocyte count decreased	1	2020-07-13		Possible related	Recovering	No	No change
020	Neutrophil count decreased	1	2019-07-08	2020-09-23	Possible no relation	Recovery	No	No change
020	Diarrhea	1	2019-07-09	2019-07-11	Highly Possible related	Deterioration of condition	No	No change
020	Diarrhea	2	2019-07-12	2019-07-15	Highly Possible related	Recovering	No	No change
020	Diarrhea	1	2019-07-16	2019-07-25	Highly Possible related	Deterioration of condition	No	No change
020	Hand-foot syndrome	1	2019-07-16	2019-07-22	Possible related	Recovery	No	No change
020	Loss of appetite	1	2019-07-22	2019-07-22	Possible related	Recovery	No	No change
020	Loss of appetite	1	2019-07-22	2019-07-25	Possible related	Recovery	No	No change
020	Diarrhea	2	2019-07-26	2019-07-26	Highly Possible related	Recovering	No	No change
020	Diarrhea	1	2019-07-27	2019-07-27	Highly Possible related	Deterioration of condition	No	No change
020	Diarrhea	2	2019-07-28	2019-07-29	Highly Possible related	Recovering	No	No change
020	Diarrhea	1	2019-07-30	2019-07-31	Highly Possible related	Deterioration of condition	No	No change
020	Diarrhea	2	2019-08-01	2019-08-01	Highly Possible related	Recovering	No	No change
020	Diarrhea	1	2019-08-02	2019-08-03	Highly Possible related	Deterioration of condition	No	No change
020	Diarrhea	2	2019-08-04	2019-08-04	Highly Possible related	Recovering	No	No change
020	Diarrhea	1	2019-08-05	2019-08-10	Highly Possible related	Deterioration of condition	No	No change
020	Diarrhea	2	2019-08-11	2019-08-11	Highly Possible related	Recovery	No	No change
020	Diarrhea	1	2019-08-12	2019-09-05	Highly Possible related	Deterioration of condition	No	No change
020	Diarrhea	1	2019-08-06	2019-09-05	Highly Possible related	Recovery	No	No change
020	Diarrhea	2	2019-09-06	2019-09-06	Highly Possible related	Recovering	No	No change
020	Fatigue	1	2019-09-06	2019-09-07	Possible related	Recovery	No	No change
020	Diarrhea	1	2019-09-07	2019-09-07	Highly Possible related	Deterioration of condition	No	No change
020	Diarrhea	3	2019-09-08	2019-09-08	Highly Possible related	Recovering	No	No change
020	Nausea	1	2019-09-08	2019-09-08	Possible related	Recovery	No	No change
020	Loss of appetite	1	2019-09-06	2019-09-09	Possible related	Recovery	No	No change
020	Diarrhea	1	2019-09-09	2019-09-12	Highly Possible related	Deterioration of condition	No	No change
020	Fatigue	1	2019-09-11	2019-09-12	Possible related	Recovery	No	No change
020	Diarrhea	2	2019-09-13	2019-09-13	Highly Possible related	Recovering	No	No change
020	Diarrhea	1	2019-09-14	20219/9/16	Highly Possible related	Deterioration of condition	No	No change
020	Diarrhea	2	2019-09-17	2019-09-17	Highly Possible related	Recovery	No	No change
020	Diarrhea	1	2019-09-25	2019-10-06	Highly Possible related	Recovery	No	No change
020	Hand-foot syndrome	1	2019-10-02	2019-10-22	Possible related	Recovery	No	No change
020	Diarrhea	1	2019-10-25	2019-12-28	Highly Possible related	Recovering	No	No change
020	Diarrhea	1	2020-01-06	2020-02-29	Highly Possible related	Recovery	No	No change
020	Diarrhea	1	2020-03-03	2020-03-26	Highly Possible related	Recovery	No	No change
020	Diarrhea	1	2020-04-02	2020-05-26	Highly Possible related	Recovery	No	No change
020	Diarrhea	1	2020-05-30	2020-06-08	Highly Possible related	Deterioration of condition	No	No change
020	Diarrhea	2	2020-06-09	2020-06-10	Highly Possible related	Recovering	No	No change
020	Diarrhea	1	2020-06-11	2020-06-27	Highly Possible related	Recovery	No	No change
021	Diarrhea	2	2019-07-25	2019-07-30	Highly Possible related	Recovery	No	No change
021	Mouth ulcer	1	2019-07-27	2019-07-31	Possible related	Recovery	No	No change
021	Rash	3	2019-07-27	2019-09-02	Possible related	Recovering	No	No change
022	Increased alanine aminotransferase	1	2019-07-23	2020-04-06	Possible related	Recovering	No	No change
022	Increased gamma-glutamyltransferase	1	2019-07-23	2020-01-05	Possible related	Deterioration of condition	No	No change
022	Increased gamma-glutamyltransferase	2	2020-01-06	2020-04-05	Possible related	Recovering	No	No change
022	Increased gamma-glutamyltransferase	1	2020-04-06		Possible related		No	No change
022	Hyperuricemia	1	2019-07-23		Possible no relation		No	No change
022	Hyperglycemia	1	2019-07-23	2019-10-15	Possible no relation	Recovery	No	No change
022	Diarrhea	1	2019-07-27	2019-07-29	Highly Possible related	Deterioration of condition	No	No change
022	Diarrhea	2	2019-07-30	2019-07-31	Highly Possible related	Recovering	No	No change
022	Diarrhea	1	2019-08-01	2019-08-02	Highly Possible related	Deterioration of condition	No	No change
022	Diarrhea	2	2019-08-03	2019-08-03	Highly Possible related	Deterioration of condition	No	No change
022	Diarrhea	3	2019-08-04	2019-08-05	Highly Possible related	Recovering	No	No change
022	Diarrhea	2	2019-08-06	2019-08-06	Highly Possible related	Recovering	No	No change
022	Diarrhea	1	2019-08-07	2019-08-10	Highly Possible related	Recovery	No	No change
022	Hand-foot syndrome	1	2019-08-11	2019-08-29	Possible related	Recovery	No	No change
022	Diarrhea	1	2019-08-13	2019-08-14	Highly Possible related	Recovery	No	No change
022	Diarrhea	2	2019-08-16	2019-08-17	Highly Possible related	Recovering	No	No change
022	Diarrhea	1	2019-08-18	2019-08-24	Highly Possible related	Recovery	No	No change
022	Diarrhea	1	2019-08-27	2019-09-08	Highly Possible related	Deterioration of condition	No	No change
022	Rash	1	2019-08-26	2019-09-12	Possible related	Recovery	No	No change
022	Diarrhea	2	2019-09-09	2019-09-11	Highly Possible related	Recovering	No	No change
022	Diarrhea	1	2019-09-12	2019-09-18	Highly Possible related	Recovery	No	No change
022	Diarrhea	2	2019-09-20	2019-09-20	Highly Possible related	Recovering	No	No change
022	Fatigue	1	2019-09-20	2019-10-16	Possible related	Recovery	No	No change
022	Rash	1	2019-09-20	2019-09-22	Possible related	Recovery	No	No change
022	Diarrhea	1	2019-09-21	2019-09-24	Highly Possible related	Deterioration of condition	No	No change
022	Diarrhea	2	2019-09-25	2019-09-25	Highly Possible related	Recovering	No	No change
022	Diarrhea	1	2019-09-26	2019-09-26	Highly Possible related	Deterioration of condition	No	No change
022	Diarrhea	2	2019-09-27	2019-09-30	Highly Possible related	Recovering	No	No change
022	Diarrhea	1	2019-10-01	2019-10-03	Highly Possible related	Recovery	No	No change
022	Diarrhea	2	2019-10-05	2019-10-05	Highly Possible related	Recovering	No	No change
022	Diarrhea	1	2019-10-06	2019-10-09	Highly Possible related	Recovery	No	No change
022	Diarrhea	1	2019-10-13	2019-10-15	Highly Possible related	Recovery	No	Interruption
022	Hypoalbuminemia	1	2019-10-14	2020-01-06	Possible no relation	Recovery	No	No change
022	Diarrhea	1	2019-10-19	2019-10-19	Highly Possible related	Deterioration of condition	No	No change
022	Fatigue	1	2019-10-19	2019-11-05	Possible related	Recovery	No	No change
022	Diarrhea	2	2019-10-20	2019-10-22	Highly Possible related	Recovering	No	No change
022	Diarrhea	1	2019-10-23	2019-10-25	Highly Possible related	Deterioration of condition	No	No change
022	Diarrhea	2	2019-10-26	2019-10-26	Highly Possible related	Recovering	No	No change
022	Diarrhea	1	2019-10-27	2019-10-27	Highly Possible related	Deterioration of condition	No	No change
022	Diarrhea	2	2019-10-28	2019-10-28	Highly Possible related	Recovering	No	No change
022	Diarrhea	1	2019-10-29	2019-10-30	Highly Possible related	Deterioration of condition	No	No change
022	Diarrhea	2	2019-10-31	2019-11-01	Highly Possible related	Recovering	No	No change
022	Diarrhea	1	2019-11-02	2019-11-06	Highly Possible related	Recovery	No	No change
022	Fatigue	1	2019-11-09	2019-01-03	Possible related	Recovery	No	No change
022	Diarrhea	1	2019-11-14	2019-11-14	Highly Possible related	Recovery	No	No change
022	Diarrhea	2	2019-11-23	2019-11-23	Highly Possible related	Recovering	No	No change
022	Diarrhea	1	2019-11-24	2019-11-26	Highly Possible related	Recovery	No	No change
022	Diarrhea	1	2019-11-29	2019-12-03	Highly Possible related	Recovery	No	No change
022	Diarrhea	1	2019-12-01	2019-12-03	Highly Possible related	Recovery	No	No change
022	Diarrhea	1	2019-12-11	2019-12-11	Highly Possible related	Recovery	No	No change
022	Diarrhea	2	2019-12-12	2019-12-13	Highly Possible related	Recovering	No	No change
022	Diarrhea	1	2019-12-14	2019-12-14	Highly Possible related	Recovery	No	No change
022	Diarrhea	1	2019-12-18	2019-12-18	Highly Possible related	Recovery	No	No change
022	Diarrhea	1	2019-12-29	2019-12-30	Highly Possible related	Recovery	No	No change
022	Fatigue	1	2020-01-29	2020-03-17	Possible related	Recovery	No	No change
022	Headache	1	2020-01-29	2020-02-12	Possible related	Recovery	No	No change
023	Diarrhea	3	2019-08-16	2019-08-21	Highly Possible related	Recovering	No	Interruption
023	Vomiting	1	2020-08-21	2020-08-22	Possible related	Recovering	No	No change
023	Diarrhea	1	2019-08-31	2019-09-03	Highly Possible related	Recovering	No	No change
023	Diarrhea	2	2019-09-04	2019-09-06	Highly Possible related	Recovering	No	No change
023	Diarrhea	1	2019-09-07	2019-09-10	Highly Possible related	Recovering	No	No change
023	Diarrhea	2	2019-09-11	2019-09-12	Highly Possible related	Recovering	No	No change
023	Diarrhea	1	2019-09-13	2019-09-23	Highly Possible related	Recovering	No	No change
023	Headache	1	2019-09-19	2019-09-20	Possible related	Recovery	No	No change
023	Diarrhea	1	2019-10-27	2020-08-20	Highly Possible related	Recovery	No	No change
023	Elevated alanine aminotransferase	1	2019-11-11	2020-02-25	Possible no relation	Recovering	No	No change
023	Elevated aspartate aminotransferase	1	2019-11-11	2020-02-25	Possible no relation	Recovery	No	No change
023	Elevated alanine aminotransferase	2	2020-05-18		Possible no relation	Recovering	No	No change
023	Elevated aspartate aminotransferase	1	2020-05-18		Possible no relation	Recovering	No	No change
023	Anemia	1	2020-05-18		Possible no relation	Recovering	No	No change
024	White blood cell count decreased	1	2019-07-29	2019-10-28	Not related	Recovering	No	No change
024	Diarrhea	1	2019-08-06	2019-08-07	Highly Possible related	Recovery	No	No change
024	Nausea	1	2019-08-06	2019-08-07	Possible related	Recovery	No	No change
024	Hand-foot syndrome	1	2019-08-06	2019-10-02	Possible related	Recovery	No	No change
024	Diarrhea	1	2019-08-12	2019-08-14	Highly Possible related	Recovery	No	No change
024	Nausea	1	2019-08-14	2019-08-15	Possible related	Recovery	No	No change
024	Diarrhea	1	2019-08-30	2019-08-30	Highly Possible related	Recovery	No	No change
024	Nausea	1	2019-08-30	2019-08-30	Possible related	Recovery	No	No change
024	Diarrhea	1	2019-09-07	2019-09-07	Highly Possible related	Recovery	No	No change
024	Nausea	1	2019-09-07	2019-09-07	Possible related	Recovery	No	No change
024	Diarrhea	1	2019-09-16	2019-09-16	Highly Possible related	Recovery	No	No change
024	Nausea	1	2019-09-16	2019-09-16	Possible related	Recovery	No	No change
025	Diarrhea	2	2019-08-09	2019-08-13	Highly Possible related	Recovering	No	No change
025	Nausea	1	2019-09-05	2019-09-06	Possible related	Recovery	No	No change
025	Hand-foot syndrome	1	2019-08-11	2019-09-04	Possible related	Recovery	No	No change
025	Fatigue	2	2019-08-11	2019-08-27	Possible related	Recovery	No	No change
025	Diarrhea	1	2019-08-14	2019-08-27	Highly Possible related	Recovery	No	No change
025	Nausea	1	2019-08-10	2019-08-12	Possible related	Recovery	No	No change
025	Diarrhea	1	2019-09-07	2019-09-09	Highly Possible related	Recovery	No	No change
025	Diarrhea	1	2019-09-13	2019-09-22	Highly Possible related	Recovery	No	No change
025	Diarrhea	1	2019-10-04	2019-10-04	Highly Possible related	Recovery	No	No change
025	Diarrhea	1	2019-10-08	2019-10-08	Highly Possible related	Recovery	No	No change
025	Diarrhea	1	2019-10-14	2019-10-14	Highly Possible related	Recovery	No	No change
025	Diarrhea	1	2019-10-21	2019-10-21	Highly Possible related	Recovery	No	No change
025	Diarrhea	1	2019-10-27	2019-10-27	Highly Possible related	Recovery	No	No change
025	Diarrhea	1	2019-11-01	2019-11-01	Highly Possible related	Recovery	No	No change
025	Diarrhea	1	2019-11-04	2019-11-04	Highly Possible related	Recovery	No	No change
025	Diarrhea	1	2019-11-10	2019-11-10	Highly Possible related	Recovery	No	No change
025	Diarrhea	1	2019-11-24	2019-11-24	Highly Possible related	Recovery	No	No change
025	Diarrhea	1	2019-12-02	2019-12-02	Highly Possible related	Recovery	No	No change
025	Diarrhea	1	2019-12-08	2019-12-08	Highly Possible related	Recovery	No	No change
025	Diarrhea	1	2020-01-05	2020-01-05	Highly Possible related	Recovery	No	No change
025	Diarrhea	1	2020-01-14	2020-01-14	Highly Possible related	Recovery	No	No change
025	Diarrhea	1	2020-02-02	2020-02-02	Highly Possible related	Recovery	No	No change
025	Diarrhea	1	2020-02-17	2020-02-17	Highly Possible related	Recovery	No	No change
025	Diarrhea	2	2020-02-25	2020-02-25	Highly Possible related	Recovery	No	No change
025	Diarrhea	1	2020-03-17	2020-03-17	Highly Possible related	Recovery	No	No change
025	Diarrhea	1	2020-04-10	2020-04-10	Highly Possible related	Recovery	No	No change
025	Diarrhea	1	2020-04-27	2020-04-27	Highly Possible related	Recovery	No	No change
025	Diarrhea	1	2020-05-03	2020-05-03	Highly Possible related	Recovery	No	No change
025	Diarrhea	1	2020-05-10	2020-05-10	Highly Possible related	Recovery	No	No change
025	Diarrhea	1	2020-06-13	2020-06-13	Highly Possible related	Recovery	No	No change
025	Diarrhea	1	2020-06-21	2020-06-21	Highly Possible related	Recovery	No	No change
025	Diarrhea	1	2020-06-28	2020-06-28	Highly Possible related	Recovery	No	No change
025	White blood cell count decreased	1	2019-08-06	2020-02-12	Possible related	Recovery	No	No change
025	Hypomagnesemia	1	2019-10-28	2020-02-12	Possible no relation	Recovery	No	No change
025	Lymphocyte count decreased	1	2020-02-12	2020-05-02	Possible related	Recovery	No	No change
025	Elevated alanine aminotransferase	1	2020-02-12	2020-05-02	Possible no relation	Recovery	No	No change
025	Elevated aspartate aminotransferase	1	2020-02-12	2020-05-02	Possible no relation	Recovery	No	No change
025	Hypoalbuminemia	1	2020-05-02	2020-08-01	Possible no relation	Recovery	No	No change
026	Nausea	1	2019-08-21	2019-08-22	Possible related	Recovery	No	No change
026	Vomiting	1	2019-08-21	2019-08-23	Possible related	Recovery	No	No change
026	Diarrhea	1	2019-08-21	2019-08-28	Highly Possible related	Recovery	No	No change
026	Fatigue	1	2019-08-23	2019-08-23	Possible related	Recovery	No	No change
026	Hand-foot syndrome	3	2019-08-25	2019-09-30	Possible related	Recovering	No	Reduction
026	Hand-foot syndrome	3	2019-10-08	2020-01-20	Possible related	Recovering	No	Interruption
026	Mouth ulcer	2	2020-01-13	2020-01-20	Possible related	Recovering	No	Discontinuation
027	Diarrhea	2	2019-08-21	2019-08-28	Highly Possible related	Recovery	No	Discontinuation
027	Nausea	2	2019-08-21	2019-08-25	Possible related	Recovery	No	Discontinuation
028	Diarrhea	2	2019-09-17	2019-09-27	Highly Possible related	Recovery	No	Reduction
028	Fatigue	2	2019-09-17	2019-09-19	Possible related	Recovery	No	No change
028	Diarrhea	2	2019-09-17	2019-09-27	Highly Possible related	Recovery	No	No change
028	Increased blood bilirubin	1	2019-09-19	2020-01-23	Possible no relation	Recovery	No	No change
028	Elevated aspartate aminotransferase	1	2020-04-20	2020-07-20	Possible no relation	Recovery	No	No change
029	Diarrhea	1	2019-09-16	2019-10-06	Highly Possible related	Recovering	No	No change
029	Diarrhea	2	2019-10-07	2019-10-13	Highly Possible related	Recovering	No	No change
029	Diarrhea	1	2019-10-14	2019-11-18	Highly Possible related	Recovery	No	No change
029	Diarrhea	1	2019-11-27	2019-11-30	Highly Possible related	Recovery	No	Interruption
029	Increased alkaline phosphatase	1	2019-12-09	2020-06-17	Possible related	Recovering	No	No change
029	Diarrhea	1	2019-12-16	2019-12-18	Highly Possible related	Recovery	No	No change
029	Diarrhea	2	2019-12-20	2019-12-21	Highly Possible related	Recovering	No	No change
029	Diarrhea	1	2019-12-21	2019-12-29	Highly Possible related	Recovery	No	No change
029	Dizziness	1	2019-12-31	2020-01-01	Possible related	Recovery	No	No change
029	Nausea	1	2020-01-01	2020-01-01	Possible related	Recovery	No	No change
029	Diarrhea	1	2020-01-04	2020-01-22	Highly Possible related	Recovery	No	No change
029	Diarrhea	1	2020-02-01	2020-02-01	Highly Possible related	Recovery	No	No change
029	Diarrhea	1	2020-02-04	2020-02-04	Highly Possible related	Recovery	No	No change
029	Dizziness	1	2020-02-06	2020-02-06	Possible related	Recovery	No	No change
029	Diarrhea	1	2020-02-07	2020-02-08	Highly Possible related	Recovery	No	No change
029	Diarrhea	1	2020-02-11	2020-02-21	Highly Possible related	Recovery	No	No change
029	Knee pain	2	2020-02-17	2020-02-29	Possible no relation	Recovery	No	No change
029	Dizziness	1	2020-02-21	2020-02-21	Possible related	Recovery	No	No change
029	Diarrhea	1	2020-02-24	2020-03-07	Highly Possible related	Recovery	No	No change
029	Hand-foot syndrome	1	2020-02-24	2020-02-29	Possible related	Recovery	No	No change
029	Diarrhea	1	2020-03-12	2020-04-05	Highly Possible related	Recovery	No	No change
029	Diarrhea	1	2020-04-08	2020-04-19	Highly Possible related	Recovery	No	No change
029	Diarrhea	2	2020-04-20	2020-04-20	Highly Possible related	Recovery	No	No change
029	Diarrhea	1	2020-04-22	2020-04-23	Highly Possible related	Recovery	No	No change
029	Diarrhea	1	2020-05-13	2020-05-13	Highly Possible related	Recovery	No	No change
029	Diarrhea	1	2020-05-16	2020-05-16	Highly Possible related	Recovery	No	No change
029	Diarrhea	1	2020-05-19	2020-05-19	Highly Possible related	Recovery	No	No change
029	Diarrhea	1	2020-06-03	2020-06-03	Highly Possible related	Recovery	No	No change
029	Diarrhea	1	2020-06-06	2020-06-06	Highly Possible related	Recovery	No	No change
029	Diarrhea	1	2020-06-10	2020-06-10	Highly Possible related	Recovery	No	No change
029	Diarrhea	1	2020-06-20	2020-06-20	Highly Possible related	Recovery	No	No change
029	Hyperuricemia	1	2020-06-17		Possible related	Recovering	No	Interruption
029	Increased creatinine	1	2020-06-17		Possible no relation	Recovering	No	Interruption
029	Diarrhea	1	2020-09-24	2020-09-24	Highly Possible related	Recovery	No	No change
029	Diarrhea	1	2020-09-26	2020-09-26	Highly Possible related	Recovery	No	No change
030	Lymphocyte count decreased	1	2019-09-14	2020-03-18	Not related	Recovering	No	No change
030	Dizziness	1	2019-09-21	2019-09-22	Possible related	Recovery	No	No change
030	Diarrhea	3	2019-09-21	2019-10-03	Highly Possible related	Recovery	No	No change
030	Fatigue	1	2019-09-23	2019-10-03	Possible related	Recovery	No	No change
030	Diarrhea	2	2019-10-11	2019-10-26	Highly Possible related	Recovery	No	No change
030	Hand-foot syndrome	2	2019-10-27	2020-01-02	Possible related	Recovery	No	No change
030	Diarrhea	2	2019-11-02	2019-11-05	Highly Possible related	Recovery	No	No change
030	Diarrhea	2	2019-11-09	2019-11-14	Highly Possible related	Recovery	No	No change
030	Diarrhea	2	2019-11-19	2019-12-01	Highly Possible related	Recovery	No	No change
030	Diarrhea	2	2019-12-08	2019-12-09	Highly Possible related	Recovery	No	No change
030	Diarrhea	1	2019-12-13	2019-12-17	Highly Possible related	Recovery	No	No change
030	Diarrhea	1	2019-12-20	2020-01-06	Highly Possible related	Recovery	No	No change
030	Diarrhea	1	2020-01-10	2020-01-27	Highly Possible related	Recovery	No	No change
030	Hand-foot syndrome	1	2020-01-10	2020-01-30	Possible related	Recovery	No	No change
030	Diarrhea	1	2020-01-31	2020-01-31	Highly Possible related	Recovery	No	No change
030	Diarrhea	1	2020-02-03	2020-02-03	Highly Possible related	Recovery	No	No change
030	Hand-foot syndrome	1	2020-02-07	2020-03-05	Possible related	Recovery	No	No change
030	Fatigue	1	2020-03-06		Possible related	Recovery	No	No change
030	Diarrhea	1	2020-03-07	2020-03-18	Highly Possible related	Recovery	No	No change
030	Lymphocyte count decreased	2	2020-03-18	2020-06-21	Possible related	Recovering	No	No change
030	White blood cell count decreased	1	2020-03-18	2020-06-21	Possible related	Recovering	No	No change
030	Anemia	1	2020-03-18	2020-06-21	Possible related	Recovery	No	No change
030	Diarrhea	1	2020-03-21	2020-03-23	Highly Possible related	Recovery	No	No change
030	Diarrhea	2	2020-03-26	2020-03-29	Highly Possible related	Recovery	No	No change
030	Diarrhea	1	2020-03-01	2020-04-02	Highly Possible related	Recovery	No	No change
030	Diarrhea	1	2020-04-05	2020-04-08	Highly Possible related	Recovery	No	No change
030	Diarrhea	2	2020-04-12	2020-04-14	Highly Possible related	Recovery	No	No change
030	Diarrhea	2	2020-04-17	2020-04-29	Highly Possible related	Recovery	No	No change
030	Diarrhea	1	2020-05-03	2020-06-25	Highly Possible related	Recovering	No	No change
031	Lymphocyte count decreased	1	2019-09-11	2019-12-04	Not related	Recovery	No	No change
031	Fatigue	1	2019-09-19	2019-10-02	Possible related	Recovery	No	No change
031	Dizziness	1	2019-09-19	2019-09-24	Possible related	Recovery	No	No change
031	Nausea	1	2019-09-19	2019-09-22	Possible related	Recovery	No	No change
031	Vomiting	1	2019-09-19	2019-09-22	Possible related	Recovery	No	No change
031	Diarrhea	1	2019-09-19	2019-11-27	Possible related	Recovery	No	No change
031	Dizziness	1	2019-09-28	2019-10-02	Possible related	Recovery	No	No change
031	Nausea	1	2019-09-29	2019-09-29	Possible related	Recovery	No	No change
031	Fatigue	1	2019-09-19	2019-10-02	Possible related	Recovery	No	No change
032	Diarrhea	2	2019-09-19	2019-10-29	Highly Possible related	Recovery	No	No change
032	Diarrhea	1	2019-10-31	2020-02-18	Highly Possible related	Recovery	No	No change
032	Fatigue	1	2019-12-16	2019-12-17	Possible related	Recovery	No	No change
032	Nausea	1	2019-12-16	2019-12-17	Possible related	Recovery	No	No change
033	Diarrhea	2	2019-10-24	2019-10-25	Highly Possible related	Recovery	No	No change
033	Elevated alanine aminotransferase	1	2020-07-16		Possible no relation	Recovering	No	No change
034	Diarrhea	2	2019-11-14	2019-11-21	Highly Possible related	Recovery	No	No change
034	Bloating	2	2019-11-19	2019-11-26	Possible related	Recovery	No	No change
034	Diarrhea	1	2019-11-28	2019-11-29	Highly Possible related	Recovery	No	No change
034	Gastric pain	2	2019-11-30	2019-12-01	Possible related	Recovery	No	No change
034	Diarrhea	2	2019-12-02	2019-12-03	Highly Possible related	Recovery	No	No change
034	Diarrhea	1	2019-12-06	2019-12-09	Highly Possible related	Recovery	No	No change
034	Hand-foot syndrome	1	2019-12-07	2019-12-12	Possible related	Recovery	No	No change
034	Abdominal pain	2	2019-12-10	2019-12-11	Possible related	Recovery	No	No change
034	Diarrhea	2	2019-12-20	2019-12-26	Highly Possible related	Recovery	No	No change
034	Diarrhea	2	2020-01-01	2020-01-06	Highly Possible related	Recovery	No	No change
034	Cold	2	2020-01-05	2020-01-19	Possible no relation	Recovery	No	No change
034	Diarrhea	1	2020-02-13	2020-02-13	Highly Possible related	Recovery	No	No change
034	Bloating	1	2020-02-16	2020-02-16	Possible related	Recovery	No	No change
034	Bloating	2	2020-02-20	2020-03-26	Possible related	Recovery	No	No change
034	Hand-foot syndrome	1	2020-03-09	2020-03-16	Possible related	Recovery	No	No change
034	Diarrhea	2	2020-03-27	2020-03-27	Highly Possible related	Recovery	No	No change
034	Diarrhea	2	2020-04-01	2020-04-03	Highly Possible related	Recovery	No	No change
034	Hand-foot syndrome	1	2020-04-05	2020-04-19	Possible related	Recovery	No	No change
034	Diarrhea	1	2020-04-07	2020-04-11	Highly Possible related	Recovery	No	No change
034	Diarrhea	1	2020-04-18	2020-04-20	Highly Possible related	Recovery	No	No change
034	Diarrhea	2	2020-04-27	2020-04-30	Highly Possible related	Recovery	No	No change
034	Diarrhea	2	2020-05-27	2020-05-28	Highly Possible related	Recovery	No	No change
034	Diarrhea	2	2020-06-17	2020-06-19	Highly Possible related	Recovery	No	No change
034	Diarrhea	1	2020-07-10	2020-07-11	Highly Possible related	Recovery	No	No change
034	Diarrhea	1	2020-07-22	2020-07-24	Highly Possible related	Recovery	No	No change
034	Diarrhea	2	2020-07-30	2020-07-31	Highly Possible related	Recovery	No	No change
034	Diarrhea	1	2020-08-08	2020-08-08	Highly Possible related	Recovery	No	No change
034	Diarrhea	2	2020-08-09	2020-08-09	Highly Possible related	Recovery	No	No change
034	Diarrhea	1	2020-08-14	2020-08-15	Highly Possible related	Recovery	No	No change
034	Diarrhea	1	2020-08-21	2020-08-23	Highly Possible related	Recovery	No	No change
035	Diarrhea	1	2019-11-19	2019-11-19	Highly Possible related	Recovery	No	No change
035	Fever	1	2019-11-19	2019-11-19	Possible no relation	Recovery	No	No change
035	Mouth ulcer	2	2019-11-20	2019-11-28	Possible related	Recovery	No	No change
035	Bloating	2	2019-11-20	2019-11-24	Possible related	Recovery	No	No change
035	Loss of appetite	1	2019-11-20	2019-11-26	Possible related	Recovery	No	No change
035	Fatigue	2	2019-11-20	2019-11-26	Possible related	Recovery	No	No change
035	Nausea	1	2019-11-23	2019-11-26	Possible related	Recovery	No	No change
035	Diarrhea	2	2019-11-24	2019-11-24	Highly Possible related	Recovery	No	No change
035	Insomnia	1	2019-11-26	2019-12-08	Possible related	Recovery	No	No change
035	Headache	1	2019-11-26	2019-11-26	Possible related	Recovery	No	No change
035	Diarrhea	1	2019-12-19	2019-12-21	Highly Possible related	Recovery	No	No change
035	Diarrhea	1	2019-12-25	2019-12-28	Highly Possible related	Recovery	No	No change
035	Diarrhea	1	2019-12-31	2020-01-03	Highly Possible related	Recovery	No	No change
035	Diarrhea	2	2020-01-06	2020-01-13	Highly Possible related	Recovery	No	No change
035	Diarrhea	2	2020-03-04	2020-03-04	Highly Possible related	Recovery	No	No change
035	Diarrhea	2	2020-04-08	2020-04-09	Highly Possible related	Recovery	No	No change
035	Diarrhea	1	2020-04-13	2020-04-13	Highly Possible related	Recovery	No	No change
035	Hyperuricemia	1	2020-06-23		Possible related	Recovering	No	No change
035	Mouth ulcer	1	2020-06-01	2020-06-03	Possible related	Recovering	No	No change
035	Diarrhea	1	2020-06-03	2020-06-03	Highly Possible related	Recovery	No	No change
035	Diarrhea	1	2020-06-05	2020-06-05	Highly Possible related	Recovery	No	No change
035	Diarrhea	1	2020-06-20	2020-06-20	Highly Possible related	Recovery	No	No change
035	Diarrhea	3	2020-06-23	2020-06-23	Highly Possible related	Recovery	No	Interruption
035	Diarrhea	2	2020-06-24	2020-06-24	Highly Possible related	Recovery	No	No change
035	Diarrhea	1	2020-06-25	2020-06-25	Highly Possible related	Recovery	No	No change
035	Diarrhea	1	2020-06-29	2020-07-10	Highly Possible related	Recovery	No	No change
035	Mouth ulcer	1	2020-07-20	2020-07-26	Possible related	Recovery	No	No change
035	Mouth ulcer	1	2020-08-11	2020-08-14	Possible related	Recovery	No	No change
035	Diarrhea	2	2020-09-03	2020-09-03	Highly Possible related	Recovery	No	No change
035	Diarrhea	1	2020-09-04	2020-09-05	Highly Possible related	Recovery	No	Interruption
035	Diarrhea	1	2020-09-15	2020-09-15	Highly Possible related	Recovery	No	No change
035	Diarrhea	2	2020-09-18	2020-09-18	Highly Possible related	Recovery	No	No change
035	Diarrhea	1	2020-09-23	2020-09-23	Highly Possible related	Recovery	No	Interruption
035	Diarrhea	1	2020-09-28	2020-09-28	Highly Possible related	Recovery	No	No change
035	Diarrhea	1	2020-10-05	2020-10-06	Highly Possible related	Recovery	No	No change
035	Diarrhea	1	2020-10-09	2020-10-09	Highly Possible related	Recovery	No	No change
036	White blood cell count decreased	2	2019-11-14	2020-01-16	Not related	Recovering	No	No change
036	Neutrophil count decreased	1	2019-11-14	2020-01-16	Not related	Recovering	No	No change
036	Lymphocyte count decreased	1	2019-11-14	2020-01-16	Not related	Recovering	No	No change
036	Diarrhea	1	2019-11-16	2019-12-06	Highly Possible related	Recovery	No	No change
036	Diarrhea	1	2019-12-12	2019-12-12	Highly Possible related	Recovery	No	No change
036	Fatigue	1	2019-12-22	2019-12-24	Possible related	Recovery	No	No change
036	Headache	1	2019-12-22	2019-12-24	Possible related	Recovery	No	No change
036	Diarrhea	1	2019-12-23	2019-12-23	Highly Possible related	Recovery	No	No change
036	Diarrhea	1	2020-01-03	2020-01-03	Highly Possible related	Recovery	No	No change
036	Diarrhea	1	2020-01-09	2020-01-09	Highly Possible related	Recovery	No	No change
036	Diarrhea	1	2020-01-22	2020-01-22	Highly Possible related	Recovery	No	No change
036	Diarrhea	1	2020-02-05	2020-02-05	Highly Possible related	Recovery	No	No change
036	Diarrhea	1	2020-03-06	2020-03-20	Highly Possible related	Recovery	No	No change
037	Diarrhea	1	2019-11-29	2019-12-17	Highly Possible related	Recovery	No	No change
037	Dizziness	1	2019-12-08	2020-06-30	Possible related	Recovering	No	No change
037	Fatigue	1	2019-12-09	2020-06-30	Possible related	Recovering	No	No change
037	Diarrhea	1	2019-11-29	2019-12-17	Highly Possible related	Recovering	No	No change
037	Diarrhea	2	2019-12-18	2019-12-19	Highly Possible related	Recovering	No	No change
037	Diarrhea	1	2019-12-20	2020-03-04	Highly Possible related	Recovery	No	No change
037	Nausea	1	2020-01-01	2020-06-30	Possible related	Recovering	No	No change
037	Vomiting	1	2020-01-01	2020-01-02	Possible related	Recovering	No	No change
037	Vomiting	1	2020-03-02	2020-03-04	Possible related	Recovery	No	No change
037	Diarrhea	1	2020-11-01	2020-11-28	Highly Possible related	Recovery	No	No change
038	Increased alanine aminotransferase	1	2019-11-16	2020-03-07	Not related	Recovery	No	No change
038	Hyperuricemia	1	2019-11-16	2020-06-16	Not related	Recovering	No	No change
038	Diarrhea	2	2019-12-08	2019-12-12	Highly Possible related	Recovery	No	No change
038	Diarrhea	3	2019-12-14	2019-12-16	Highly Possible related	Recovering	No	No change
038	Diarrhea	2	2019-12-17	2019-12-22	Highly Possible related	Recovery	No	No change
038	Diarrhea	1	2019-12-27	2019-12-28	Highly Possible related	Recovery	No	No change
038	Diarrhea	1	2020-01-02	2020-01-03	Highly Possible related	Recovery	No	No change
038	Hand-foot syndrome	2	2020-01-14	2020-04-10	Possible related	Recovery	No	No change
038	Diarrhea	2	2020-02-14	2020-02-20	Highly Possible related	Recovery	No	No change
038	Mouth ulcer	2	2020-02-18	2020-06-07	Possible related	Recovering	No	No change
038	Diarrhea	2	2020-02-24	2020-02-26	Highly Possible related	Recovery	No	No change
038	Diarrhea	1	2020-03-03	2020-03-05	Highly Possible related	Recovery	No	No change
038	Increased creatinine	1	2020-03-07	2020-06-16	Possible no relation	Recovering	No	No change
038	Hypomagnesemia	1	2020-03-07	2020-06-16	Possible no relation	Recovery	No	No change
038	Diarrhea	1	2020-03-20	2020-04-02	Highly Possible related	Recovering	No	No change
038	Diarrhea	2	2020-04-02	2020-04-02	Highly Possible related	Recovery	No	No change
038	Diarrhea	1	2020-04-08	2020-04-23	Highly Possible related	Recovery	No	No change
038	Diarrhea	1	2020-04-28	2020-04-30	Highly Possible related	Recovery	No	No change
038	Diarrhea	1	2020-05-06	2020-05-08	Highly Possible related	Recovery	No	No change
038	Diarrhea	1	2020-05-10	2020-05-29	Highly Possible related	Recovery	No	No change
038	Diarrhea	1	2020-07-11	2020-08-06	Possible related	Recovering	No	No change
038	Mouth ulcer	1	2020-07-13	2020-08-08	Possible related	Recovery	No	No change
038	Elevated creatinine	1	2020-08-30		Possible no relation	Recovering	No	No change
038	Elevated creatinine	1	2020-08-30		Possible related	Recovering	No	No change
038	Hyperuricemia	1	2020-08-30		Possible no relation	Recovering	No	No change
039	Diarrhea	1	2019-12-21	2020-01-28	Highly Possible related	Recovering	No	No change
039	Dizziness	1	2019-12-22	2020-01-19	Possible related	Recovery	No	No change
039	Headache	1	2019-12-28	2019-12-28	Possible related	Recovery	No	No change
039	Headache	1	2020-01-05	2020-01-06	Possible related	Recovery	No	No change
039	Nausea	1	2020-01-06	2020-01-09	Possible related	Recovery	No	No change
039	Dizziness	1	2020-01-27	2020-02-01	Possible related	Recovery	No	No change
039	Diarrhea	2	2020-01-29	2020-01-31	Highly Possible related	Recovering	No	No change
039	Nausea	1	2020-01-29	2020-01-30	Possible related	Recovery	No	No change
039	Diarrhea	2	2020-01-29	2020-01-31	Highly Possible related	Recovering	No	No change
039	Diarrhea	1	2020-02-01	2020-03-10	Highly Possible related	Recovery	No	No change
039	Diarrhea	1	2020-03-15	2020-03-15	Highly Possible related	Recovery	No	No change
039	White blood cell count decreased	1	2020-03-20	2020-06-19	Possible no relation	Deterioration of condition	No	No change
039	Neutrophil count decreased	1	2020-03-20	2020-06-19	Possible related	Deterioration of condition	No	No change
039	ALT increased	1	2020-03-20	2020-06-19	Possible related	Recovery	No	No change
039	Diarrhea	2	2020-06-07	2020-06-15	Highly Possible related	Recovering	No	No change
039	Diarrhea	1	2020-06-16	2020-08-30	Highly Possible related	Recovering	No	No change
039	White blood cell count decreased	2	2020-06-19		Possible no relation	Recovering	No	No change
039	Neutrophil count decreased	2	2020-06-19		Possible related	Recovering	No	No change
039	Diarrhea	1	2020-08-31	2020-09-10	Highly Possible related	Recovering	No	No change
039	Diarrhea	1	2020-09-21	2020-09-26	Highly Possible related	Recovering	No	No change
039	Diarrhea	1	2020-10-03	2020-10-06	Highly Possible related	Recovering	No	No change
039	Diarrhea	1	2020-10-20	2020-10-22	Highly Possible related	Recovering	No	No change
039	Diarrhea	1	2020-10-31	2020-11-06	Highly Possible related	Recovery	No	No change
039	Diarrhea	1	2020-11-18	2020-11-20	Highly Possible related	Recovery	No	No change
039	Diarrhea	1	2020-11-23	2020-11-23	Highly Possible related	Recovery	No	No change
040	Hyperuricemia	1	2020-01-02	2020-04-08	Not related	Recovering	No	No change
040	Diarrhea	2	2020-01-10	2020-01-26	Highly Possible related	Recovering	No	No change
040	Fatigue	1	2020-01-10	2020-02-06	Possible related	Recovery	No	No change
040	Nausea	1	2020-01-10	2020-01-27	Possible related	Recovery	No	No change
040	Diarrhea	1	2020-01-27	2020-02-06	Highly Possible related	Recovery	No	No change
040	Diarrhea	1	2020-02-09	2020-02-11	Highly Possible related	Recovery	No	No change
040	Diarrhea	1	2020-02-17	2020-02-19	Highly Possible related	Recovery	No	No change
040	Diarrhea	1	2020-02-23	2020-02-26	Highly Possible related	Recovery	No	No change
040	Fatigue	1	2020-02-27	2020-02-27	Possible related	Recovery	No	No change
040	Nausea	1	2020-02-27	2020-02-27	Possible related	Recovery	No	No change
040	Diarrhea	1	2020-03-01	2020-03-01	Highly Possible related	Recovery	No	No change
040	Fatigue	1	2020-03-02	2020-03-04	Possible related	Recovery	No	No change
040	Diarrhea	1	2020-03-10	2020-03-11	Highly Possible related	Recovery	No	No change
040	Diarrhea	1	2020-03-15	2020-03-16	Highly Possible related	Recovery	No	No change
040	Diarrhea	1	2020-03-19	2020-03-21	Highly Possible related	Recovery	No	No change
040	Diarrhea	1	2020-03-25	2020-03-25	Highly Possible related	Recovery	No	No change
040	Diarrhea	1	2020-03-30	2020-03-31	Highly Possible related	Recovery	No	No change
040	Diarrhea	1	2020-04-03	2020-04-06	Highly Possible related	Recovery	No	No change
040	Fatigue	1	2020-04-15	2020-04-19	Possible related	Recovery	No	No change
040	Diarrhea	1	2020-04-16	2020-04-18	Highly Possible related	Recovery	No	No change
040	Dizziness	1	2020-04-22	2020-04-22	Possible related	Recovery	No	No change
040	Diarrhea	1	2020-04-22	2020-04-22	Highly Possible related	Recovery	No	No change
040	Fatigue	1	2020-04-25	2020-04-27	Possible related	Recovery	No	No change
040	Diarrhea	1	2020-04-25	2020-04-26	Highly Possible related	Recovery	No	No change
040	Diarrhea	1	2020-05-01	2020-05-01	Highly Possible related	Recovery	No	No change
040	Diarrhea	1	2020-05-04	2020-05-04	Highly Possible related	Recovery	No	No change
040	Fatigue	1	2020-05-08	2020-05-11	Possible related	Recovery	No	No change
040	Diarrhea	1	2020-05-08	2020-05-13	Highly Possible related	Recovery	No	No change
040	Diarrhea	1	2020-05-19	2020-05-21	Highly Possible related	Recovery	No	No change
040	Diarrhea	1	2020-05-28	2020-05-29	Highly Possible related	Recovery	No	No change
040	Diarrhea	1	2020-06-01	2020-06-03	Highly Possible related	Recovery	No	No change
040	Diarrhea	1	2020-06-11	2020-06-12	Highly Possible related	Recovery	No	No change
040	Diarrhea	1	2020-06-16	2020-06-17	Highly Possible related	Recovery	No	No change
040	Diarrhea	1	2020-06-23	2020-06-25	Highly Possible related	Recovery	No	No change
040	Fatigue	1	2020-06-29	2020-07-01	Possible related	Recovery	No	No change
040	Diarrhea	1	2020-07-02	2020-07-04	Highly Possible related	Recovery	No	No change
040	Diarrhea	1	2020-10-16	2020-10-18	Highly Possible related	Recovery	No	No change
040	Diarrhea	2	2020-02-19	2020-02-24	Highly Possible related	Recovering	No	No change
041	Diarrhea	1	2020-02-25	2020-02-26	Highly Possible related	Recovering	No	No change
041	Diarrhea	2	2020-02-27	2020-02-27	Highly Possible related	Recovery	No	No change
041	Diarrhea	3	2020-03-06	2020-03-06	Highly Possible related	Recovery	No	No change
041	Diarrhea	1	2020-03-11	2020-03-12	Highly Possible related	Recovery	No	No change
041	Diarrhea	2	2020-03-15	2020-03-15	Highly Possible related	Recovery	No	No change
041	Hyperuricemia	1	2020-04-01	2020-10-23	Possible related	Recovering	No	No change
041	Diarrhea	1	2020-04-01	2020-04-08	Highly Possible related	Recovering	No	No change
041	Diarrhea	2	2020-04-09	2020-04-09	Highly Possible related	Recovering	No	No change
041	Diarrhea	1	2020-04-10	2020-04-14	Highly Possible related	Recovering	No	No change
041	Diarrhea	2	2020-04-15	2020-04-17	Highly Possible related	Recovery	No	No change
041	Diarrhea	2	2020-04-20	2020-04-20	Highly Possible related	Recovery	No	No change
041	Diarrhea	1	2020-04-23	2020-04-23	Highly Possible related	Recovery	No	No change
041	Diarrhea	1	2020-04-26	2020-04-26	Highly Possible related	Recovery	No	No change
041	Diarrhea	1	2020-05-24	2020-05-24	Highly Possible related	Recovery	No	No change
041	Diarrhea	2	2020-06-26	2020-06-27	Highly Possible related	Recovery	No	No change
041	Diarrhea	1	2020-07-02	2020-07-02	Highly Possible related	Recovery	No	No change
041	Diarrhea	2	2020-07-04	2020-07-07	Highly Possible related	Recovery	No	No change
041	Diarrhea	3	2020-07-22	2020-07-22	Highly Possible related	Recovery	No	No change
041	Diarrhea	1	2020-07-23	2020-07-30	Highly Possible related	Recovery	No	No change
041	Diarrhea	1	2020-08-12	2020-08-13	Highly Possible related	Recovery	No	No change
041	Diarrhea	1	2020-08-18	2020-08-18	Highly Possible related	Recovery	No	No change
041	Diarrhea	2	2020-08-30	2020-08-30	Highly Possible related	Recovery	No	No change
041	Diarrhea	1	2020-09-16	2020-09-16	Highly Possible related	Recovery	No	No change
041	Diarrhea	1	2020-10-10	2020-10-10	Highly Possible related	Recovery	No	No change
041	Diarrhea	1	2020-10-14	2020-10-14	Highly Possible related	Recovery	No	No change
041	Diarrhea	2	2020-11-16	2020-11-16	Highly Possible related	Recovery	No	No change
042	Nausea	1	2020-01-16	2020-01-16	Possible related	Recovery	No	No change
042	Leg pain	1	2020-01-17	2020-01-18	Possible no relation	Recovery	No	No change
042	Sore throat	1	2020-01-19	2020-01-22	Possible no relation	Recovery	No	No change
042	Diarrhea	1	2020-01-24	2020-06-28	Highly Possible related	Recovering	No	No change
042	Hand-foot syndrome	1	2020-02-10	2020-02-20	Possible related	Recovery	No	No change
042	Vomiting	1	2020-03-29	2020-03-29	Possible related	Recovery	No	No change
042	Hand-foot syndrome	1	2020-04-01	2020-04-14	Possible related	Recovery	No	No change
042	GGT增高	1	2020-06-23	2020-09-15	Possible related	Recovering	No	No change
043	Diarrhea	1	2020-03-18	2020-03-18	Highly Possible related	Recovery	No	No change
043	Diarrhea	1	2020-03-26	2020-03-26	Highly Possible related	Recovery	No	No change
043	Diarrhea	1	2020-05-17	2020-05-17	Highly Possible related	Recovery	No	No change
043	Diarrhea	1	2020-09-01	2020-09-01	Highly Possible related	Recovery	No	No change
044	Hyperglycemia	2	2021-01-20		Not related	Recovering	No	No change
044	高血压	1	2020-01-20		Not related	Recovering	No	No change
044	Lymphocyte count decreased	1	2020-01-20	2020-04-08	Possible related	Deterioration of condition	No	No change
044	Fatigue	1	2020-01-23	2020-03-20	Possible related	Recovery	No	No change
044	Diarrhea	2	2020-01-26	2020-02-20	Highly Possible related	Recovery	No	No change
044	Hand-foot syndrome	2	2020-03-18	2020-04-10	Possible related	Recovery	No	No change
044	Lymphocyte count decreased	2	2020-04-08		Possible related	Recovering	No	No change
045	Hand-foot syndrome	2	2020-06-02		Possible related	Recovering	No	No change
045	Hyperuricemia	1	2020-02-27	2020-08-11	Possible no relation	Recovering	No	No change
045	Increased alkaline phosphatase	1	2020-02-27	2020-08-11	Possible related	Recovering	No	No change
045	Diarrhea	2	2020-03-03	2020-03-08	Highly Possible related	Recovery	No	No change
045	Fatigue	1	2020-03-04	2020-03-11	Possible related	Recovery	No	No change
046	Hyperuricemia	1	2020-02-27	2020-09-16	Possible no relation	Recovering	No	No change
046	Increased alkaline phosphatase	1	2020-02-27	2020-09-16	Possible no relation	Recovering	No	No change
047	血胆红素增高	1	2020-02-29	2020-06-10	Possible no relation	Recovery	No	No change
047	Increased alanine aminotransferase	1	2020-02-29	2020-06-10	Possible no relation	Recovery	No	No change
047	Fatigue	1	2020-05-12	2020-05-15	Possible related	Recovery	No	No change
047	Hand-foot syndrome	2	2020-05-12	2020-05-15	Possible related	Recovery	No	No change
047	Diarrhea	2	2020-05-12	2020-05-21	Highly Possible related	Recovery	No	No change
047	Dizziness	1	2020-05-14	2020-05-14	Possible related	Recovery	No	No change
047	Dizziness	1	2020-05-17	2020-05-17	Possible related	Recovery	No	No change
047	Dizziness	1	2020-05-20	2020-05-20	Possible related	Recovery	No	No change
047	Fatigue	1	2020-05-24	2020-05-25	Possible related	Recovery	No	No change
047	Diarrhea	1	2020-05-27	2020-05-27	Highly Possible related	Recovery	No	No change
047	Diarrhea	1	2020-05-30	2020-05-30	Highly Possible related	Recovery	No	No change
047	Diarrhea	1	2020-06-02	2020-06-02	Highly Possible related	Recovery	No	No change
047	Fatigue	1	2020-06-03	2020-06-06	Possible related	Recovery	No	No change
047	Decreased red blood cell count	1	2020-06-10		Possible no relation
047	Hyperglycemia	1	2020-06-10	2020-09-16	Possible no relation	Recovering	No	No change
047	Diarrhea	2	2020-07-01	2020-07-03	Highly Possible related	Recovery	No	No change
047	Diarrhea	1	2020-07-08	2020-07-09	Highly Possible related	Recovery	No	No change
047	Diarrhea	1	2020-07-18	2020-07-18	Highly Possible related	Recovery	No	No change
047	Diarrhea	1	2020-07-22	2020-07-22	Highly Possible related	Recovery	No	No change
047	Lymphocyte count decreased	1	2020-09-16		Possible no relation	Recovering	No	No change
048	Lymphocyte count decreased	1	2020-03-05		Possible no relation	Recovering	No	No change
048	Diarrhea	2	2020-03-08	2020-03-12	Highly Possible related	Recovery	No	No change
048	Vomiting	2	2020-03-08	2020-03-12	Possible related	Recovery	No	No change
049	Diarrhea	2	2020-03-13	2020-03-22	Highly Possible related	Recovering	No	No change
049	Diarrhea	1	2020-03-23	2020-03-26	Highly Possible related	Deterioration of condition	No	No change
049	Diarrhea	2	2020-03-27	2020-03-31	Highly Possible related	Recovering	No	No change
049	Diarrhea	1	2020-04-01	2020-04-10	Highly Possible related	Recovering	No	No change
049	Fatigue	1	2020-04-17	2020-04-18	Possible related	Recovery	No	No change
049	Diarrhea	2	2020-04-11	2020-04-17	Highly Possible related	Deterioration of condition	No	No change
049	Diarrhea	3	2020-04-18	2020-04-20	Highly Possible related	Recovering	No	No change
049	Diarrhea	1	2020-04-21	2020-04-27	Highly Possible related	Recovery	No	No change
049	Diarrhea	1	2020-04-30	2020-05-04	Highly Possible related	Recovery	No	No change
049	Diarrhea	1	2020-05-08	2020-05-30	Highly Possible related	Recovery	No	No change
049	Diarrhea	1	2020-06-01	2020-06-03	Highly Possible related	Recovery	No	No change
049	Diarrhea	1	2020-06-01	2020-06-03	Highly Possible related	Recovery	No	No change
049	Diarrhea	1	2020-06-08	2020-06-09	Highly Possible related	Recovery	No	No change
049	Diarrhea	1	2020-06-12	2020-06-17	Highly Possible related	Recovery	No	No change
049	Diarrhea	1	2020-06-21	2020-06-29	Highly Possible related	Recovery	No	No change
049	Diarrhea	1	2020-07-02	2020-07-02	Highly Possible related	Recovery	No	No change
049	Diarrhea	1	2020-07-05	2020-07-05	Highly Possible related	Recovery	No	No change
050	Bloating	1	2020-03-12	2020-03-12	Possible related	Recovery	No	No change
050	Sore throat	1	2020-03-14	2020-03-16	Possible related	Recovery	No	No change
050	Fatigue	1	2020-03-16		Possible related	Recovering	No	No change
050	Diarrhea	2	2020-03-16	2020-03-16	Highly Possible related	Recovery	No	No change
050	Dizziness	1	2020-03-16		Possible related	Recovering	No	No change
050	Vomiting	1	2020-03-18	2020-03-18	Possible related	Recovery	No	No change
050	Nausea	1	2020-03-19	2020-03-19	Possible related	Recovery	No	No change
050	Diarrhea	2	2020-03-19	2020-03-21	Highly Possible related	Recovery	No	No change
050	Diarrhea	2	2020-03-24	2020-03-29	Highly Possible related	Recovery	No	No change
050	Nausea	1	2020-03-25		Possible related	Recovering	No	No change
050	Bloating	1	2020-03-21	2020-03-22	Possible related	Recovery	No	No change
050	Loss of appetite	1	2020-03-19	2020-03-24	Possible related	Recovery	No	No change
050	Loss of appetite	1	2020-03-29		Possible related	Recovering	No	No change
050	Diarrhea	2	2020-04-02	2020-04-02	Highly Possible related	Recovery	No	No change
050	Hand-foot syndrome	1	2020-04-02		Possible related	Recovering	No	No change
050	Diarrhea	2	2020-04-06	2020-04-06	Highly Possible related	Recovery	No	No change
050	Diarrhea	2	2020-04-09	2020-04-09	Highly Possible related	Recovery	No	No change
050	Diarrhea	2	2020-04-14	2020-04-15	Highly Possible related	Recovery	No	No change
050	Diarrhea	2	2020-04-27	2020-04-27	Highly Possible related	Recovery	No	No change
050	Diarrhea	2	2020-05-11	2020-05-11	Highly Possible related	Recovery	No	No change
050	White blood cell count decreased	1	2020-05-23		Possible related	Recovering	No	No change
050	Hyperuricemia	1	2020-05-23		Possible no relation	Recovering	No	No change
050	Diarrhea	2	2020-06-22	2020-06-22	Highly Possible related	Recovery	No	No change
051	Diarrhea	2	2020-03-31	2020-04-08	Highly Possible related	Recovery	No	No change
051	Diarrhea	2	2020-04-11	2020-04-25	Highly Possible related	Recovering	No	No change
051	Diarrhea	1	2020-04-26	2020-05-01	Highly Possible related	No change	No	No change
051	Diarrhea	2	2020-05-02	2020-05-16	Highly Possible related	Recovering	No	No change
051	Diarrhea	1	2020-05-17	2020-06-03	Highly Possible related	Recovering	No	No change
051	Diarrhea	2	2020-06-04	2020-06-05	Highly Possible related	Recovering	No	No change
051	Diarrhea	1	2020-06-06	2020-09-04	Highly Possible related	Recovering	No	No change
051	Diarrhea	1	2020-09-06	2020-09-18	Highly Possible related	Recovering	No	No change
051	Diarrhea	1	2020-09-20	2020-10-10	Highly Possible related	Recovering	No	No change
051	Elevated creatinine	1	2020-09-15		Possible no relation	Recovering	No	No change
051	Diarrhea	1	2020-10-11	2020-10-24	Highly Possible related	Recovering	No	No change
051	Diarrhea	2	2020-10-18	2020-10-18	Highly Possible related	Recovering	No	No change
051	Diarrhea	1	2020-10-19	2020-10-26	Highly Possible related	Recovering	No	No change
051	Diarrhea	2	2020-10-27	2020-10-27	Highly Possible related	Recovering	No	No change
051	Diarrhea	1	2020-12-06	2020-01-02	Highly Possible related	Recovering	No	No change
051	Diarrhea	1	2020-10-28	2020-12-20	Highly Possible related	Recovering	No	No change
051	Hyperuricemia	1	2020-12-08	2021-03-06	Possible no relation	Recovering	No	No change
051	Diarrhea	2	2020-12-21	2020-12-21	Highly Possible related	Recovering	No	No change
051	Diarrhea	1	2020-12-22	2020-12-24	Highly Possible related	Recovering	No	No change
051	Diarrhea	2	2020-12-25	2020-12-25	Highly Possible related	Recovering	No	No change
051	Diarrhea	1	2020-12-26	2020-12-28	Highly Possible related	Recovering	No	No change
051	Diarrhea	2	2020-12-29	2020-12-29	Highly Possible related	Recovering	No	No change
051	Diarrhea	1	2020-12-30	2021-01-03	Highly Possible related	Recovering	No	No change
051	Diarrhea	2	2021-01-04	2021-01-04	Highly Possible related	Recovering	No	No change
051	Diarrhea	1	2021-01-05	2021-02-07	Highly Possible related	Recovering	No	No change
051	Diarrhea	2	2021-02-08	2021-02-08	Highly Possible related	Recovering	No	No change
051	Diarrhea	1	2021-02-09	2021-02-14	Highly Possible related	Recovering	No	No change
051	Diarrhea	2	2021-02-15	2021-02-16	Highly Possible related	Recovering	No	No change
051	Diarrhea	1	2021-02-17	2021-02-19	Highly Possible related	Recovering	No	No change
051	Diarrhea	1	2021-02-20	2021-02-20	Highly Possible related	Recovering	No	No change
051	Diarrhea	1	2021-02-21	2021-02-26	Highly Possible related	Recovering	No	No change
052	Lymphocyte count decreased	1	2020-03-31	2020-06-23	Not related	Recovering	No	No change
052	Anemia	1	2020-03-31	2020-06-23	Not related	Recovery	No	No change
052	Diarrhea	1	2020-04-05	2020-05-08	Highly Possible related	Recovering	No	No change
052	Diarrhea	2	2020-05-09	2020-05-09	Highly Possible related	Recovering	No	No change
052	Diarrhea	1	2020-05-10	2020-07-29	Highly Possible related	Recovering	No	No change
052	Diarrhea	2	2020-05-30	2020-07-30	Highly Possible related	Recovering	No	No change
052	Diarrhea	1	2020-07-31	2020-08-09	Highly Possible related	Recovering	No	No change
052	Diarrhea	2	2020-08-10	2020-08-10	Highly Possible related	Recovering	No	No change
052	Diarrhea	1	2020-08-11	2020-08-14	Highly Possible related	Recovering	No	No change
052	Diarrhea	2	2020-08-15	2020-08-15	Highly Possible related	Recovering	No	No change
052	Diarrhea	1	2020-08-16	2020-08-21	Highly Possible related	Recovering	No	No change
052	Diarrhea	2	2020-08-22	2020-08-22	Highly Possible related	Recovering	No	No change
052	Diarrhea	1	2020-08-23	2020-08-28	Highly Possible related	Recovering	No	No change
052	Diarrhea	2	2020-08-29	2020-08-29	Highly Possible related	Recovering	No	No change
052	Diarrhea	1	2020-08-30	2020-09-04	Highly Possible related	Recovering	No	No change
052	Diarrhea	2	2020-09-05	2020-09-05	Highly Possible related	Recovering	No	No change
052	Diarrhea	1	2020-09-06	2020-09-11	Highly Possible related	Recovering	No	No change
052	Diarrhea	2	2020-09-12	2020-09-12	Highly Possible related	Recovering	No	No change
052	Diarrhea	1	2020-09-13	2020-10-10	Highly Possible related	Recovering	No	No change
052	Diarrhea	2	2020-10-11	2020-10-11	Highly Possible related	Recovering	No	No change
052	Diarrhea	1	2020-10-12	2020-11-15	Highly Possible related	Recovering	No	No change
052	Diarrhea	1	2020-11-17	2020-11-18	Highly Possible related	Recovering	No	No change
052	Diarrhea	2	2020-11-19	2020-11-19	Highly Possible related	Recovering	No	No change
052	Diarrhea	1	2020-11-20	2020-11-27	Highly Possible related	Recovering	No	No change
052	Diarrhea	2	2020-11-28	2020-11-28	Highly Possible related	Recovering	No	No change
052	Diarrhea	1	2020-11-29	2020-12-04	Highly Possible related	Recovering	No	No change
052	Lymphocyte count decreased	1	2020-12-02		Possible related	Recovering	No	No change
052	Anemia	1	2020-12-02		Highly Possible related	Recovering	No	No change
052	Diarrhea	2	2020-12-05	2020-12-05	Highly Possible related	Deterioration of condition	No	No change
052	Diarrhea	1	2020-12-06	2020-12-07	Highly Possible related	Recovery	No	No change
052	Diarrhea	2	2020-12-08	2020-12-08	Highly Possible related	Deterioration of condition	No	No change
052	Diarrhea	1	2020-12-09	2020-12-10	Highly Possible related	Recovery	No	No change
052	Diarrhea	2	2020-12-11	2020-12-11	Highly Possible related	Deterioration of condition	No	No change
052	Diarrhea	1	2020-12-12	2020-12-13	Highly Possible related	Recovery	No	No change
052	Diarrhea	2	2020-12-14	2020-12-15	Highly Possible related	Deterioration of condition	No	No change
053	Diarrhea	2	2020-04-06	2020-04-07	Highly Possible related	Recovery	No	No change
053	Diarrhea	1	2020-04-08	2020-04-24	Highly Possible related	Recovery	No	No change
053	Diarrhea	2	2020-04-27	2020-04-30	Highly Possible related	Recovery	No	No change
053	Diarrhea	1	2020-05-01	2020-05-06	Highly Possible related	No change	No	No change
053	Diarrhea	3	2020-05-07	2020-05-09	Highly Possible related	Recovering	No	No change
053	Diarrhea	1	2020-05-10	2020-05-16	Highly Possible related	Recovery	No	No change
053	Diarrhea	1	2020-05-23	2020-05-31	Highly Possible related	Recovery	No	No change
053	Diarrhea	1	2020-06-23	2020-06-23	Highly Possible related	Recovery	No	No change
053	Diarrhea	1	2020-08-26	2020-09-06	Highly Possible related	Recovery	No	No change
053	Diarrhea	1	2020-09-08	2020-09-13	Highly Possible related	Recovery	No	No change
053	Diarrhea	3	2020-09-14	2020-09-14	Highly Possible related	Recovery	No	No change
053	Diarrhea	2	2020/109/15	2020-09-15	Highly Possible related	Recovery	No	No change
053	Diarrhea	1	2020-09-16	2020-09-30	Highly Possible related	Recovery	No	No change
053	Diarrhea	1	2020-10-02	2020-10-15	Highly Possible related	Recovery	No	No change
053	Diarrhea	2	2020-10-16	2020-10-16	Highly Possible related	Recovery	No	No change
053	Diarrhea	1	2020-10-17	2020-10-18	Highly Possible related	Recovery	No	No change
053	Diarrhea	2	2020-10-19	2020-10-19	Highly Possible related	Recovery	No	No change
053	Diarrhea	1	2020-10-20	2020-10-24	Highly Possible related	Recovery	No	No change
053	Diarrhea	1	2020-10-28	2021-01-10	Highly Possible related	Recovery	No	No change
053	Diarrhea	1	2021-01-13	2021-01-13	Highly Possible related	Recovery	No	No change
053	Diarrhea	1	2021-01-15	2021-01-16	Highly Possible related	Recovery	No	No change
053	Diarrhea	1	2021-01-19	2021-01-21	Highly Possible related	Recovery	No	No change
053	Diarrhea	2	2021-01-22	2021-01-22	Highly Possible related	Recovery	No	No change
053	Diarrhea	1	2021-01-23	2021-02-07	Highly Possible related	Recovery	No	No change
053	Diarrhea	1	2021-02-10	2021-02-18	Highly Possible related	Recovery	No	No change
053	Diarrhea	2	2021-02-19	2021-02-19	Highly Possible related	Recovery	No	No change
053	Diarrhea	1	2021-02-20	2021-02-28	Highly Possible related	Recovery	No	No change
053	Diarrhea	1	2021-03-02	2021-03-03	Highly Possible related	Recovery	No	No change
053	Diarrhea	1	2021-03-06	2021-03-06	Highly Possible related	Recovery	No	No change
053	Diarrhea	1	2021-03-09	2021-03-14	Highly Possible related	Recovery	No	No change
053	Diarrhea	1	2021-03-16	2021-03-16	Highly Possible related	Recovery	No	No change
053	Diarrhea	1	2021-03-19	2021-03-20	Highly Possible related	Recovery	No	No change
053	Anemia	1	2021-04-20		Possible no relation	Recovering	No	No change
053	Lymphocyte count decreased	1	2021-04-20		Possible related	Recovering	No	No change
054	Hyperuricemia	1	2020-04-06		Not related	Recovering	No	No change
054	Diarrhea	2	2020-04-07	2020-04-15	Highly Possible related	Recovery	No	Interruption
054	Diarrhea	1	2020-05-15	2020-05-15	Highly Possible related	Recovery	No	Reduction
054	Diarrhea	1	2020-05-22	2020-05-23	Highly Possible related	Recovery	No	Increase
054	Diarrhea	1	2020-07-26	2020-08-09	Highly Possible related	No change	No	Increase
054	Diarrhea	1	2020-08-15	2020-08-21	Highly Possible related	No change	No	No change
054	Diarrhea	1	2020-08-29	2020-09-24	Highly Possible related	No change	No	No change
054	Diarrhea	1	2021-02-02	2021-03-01	Highly Possible related	No change	No	No change
055	Diarrhea	1	2020-04-15	2020-04-15	Highly Possible related	Recovering	No	No change
055	Diarrhea	3	2020-04-16	2020-04-16	Highly Possible related	Deterioration of condition	No	No change
055	Diarrhea	1	2020-04-17	2020-04-17	Highly Possible related	Recovering	No	No change
055	Diarrhea	3	2020-04-18	2020-04-19	Highly Possible related	Deterioration of condition	No	No change
055	Diarrhea	1	2020-04-20	2020-04-21	Highly Possible related	Recovering	No	No change
055	Diarrhea	2	2020-04-22	2020-04-23	Highly Possible related	Recovering	No	No change
055	Diarrhea	3	2020-04-24	2020-04-24	Highly Possible related	Deterioration of condition	No	No change
055	Diarrhea	1	2020-04-25	2020-04-28	Highly Possible related	Recovering	No	No change
055	Diarrhea	2	2020-04-29	2020-04-29	Highly Possible related	Deterioration of condition	No	No change
055	Diarrhea	1	2020-04-30	2020-04-30	Highly Possible related	Recovery	No	No change
055	Diarrhea	2	2020-05-01	2020-05-02	Highly Possible related	Deterioration of condition	No	No change
055	Diarrhea	1	2020-05-04	2020-05-13	Highly Possible related	Recovery	No	No change
055	Diarrhea	1	2020-05-17	2020-05-17	Highly Possible related	Recovering	No	No change
055	Diarrhea	2	2020-05-18	2020-05-18	Highly Possible related	Deterioration of condition	No	No change
055	Diarrhea	1	2020-05-19	2020-05-31	Highly Possible related	Recovery	No	No change
055	Diarrhea	1	2020-06-05	2020-06-05	Highly Possible related	Recovering	No	No change
055	Diarrhea	1	2020-06-07	2020-06-12	Highly Possible related	Recovering	No	No change
055	Diarrhea	2	2020-06-13	2020-06-13	Highly Possible related	Recovering	No	No change
055	Diarrhea	1	2020-06-14	2020-06-14	Highly Possible related	Recovering	No	No change
055	Diarrhea	2	2020-06-15	2020-06-15	Highly Possible related	Recovering	No	No change
055	Diarrhea	1	2020-06-17	2020-06-17	Highly Possible related	Recovering	No	No change
055	Diarrhea	3	2020-06-18	2020-06-18	Highly Possible related	Recovering	No	No change
055	Diarrhea	1	2020-06-23	2020-06-28	Highly Possible related	Recovering	No	No change
055	Diarrhea	1	2020-06-23	2020-06-28	Highly Possible related	Recovering	No	No change
055	Diarrhea	2	2020-07-04	2020-07-06	Highly Possible related	Recovering	No	No change
055	Diarrhea	1	2020-07-13	2020-07-13	Highly Possible related	Recovering	No	No change
055	Diarrhea	1	2020-07-13	2020-07-13	Highly Possible related	Recovering	No	No change
055	Diarrhea	2	2020-07-14	2020-07-14	Highly Possible related	Recovering	No	No change
055	Diarrhea	1	2020-07-26	2020-07-26	Highly Possible related	Recovering	No	No change
055	Diarrhea	1	2020-07-30	2020-07-31	Highly Possible related	Recovering	No	No change
055	Diarrhea	1	2020-08-07	2020-08-07	Highly Possible related	Recovering	No	No change
055	Diarrhea	1	2020-08-12	2020-08-13	Highly Possible related	Recovering	No	No change
055	Diarrhea	1	2020-08-18	2020-08-18	Highly Possible related	Recovering	No	No change
055	Diarrhea	2	2020-08-19	2020-08-19	Highly Possible related	Recovering	No	No change
055	Diarrhea	3	2020-08-20	2020-08-20	Highly Possible related	Deterioration of condition	No	Interruption
055	Diarrhea	1	2020-08-21	2020-08-21	Highly Possible related	Recovering	No	No change
055	Diarrhea	1	2020-08-24	2020-08-24	Highly Possible related	Recovering	No	No change
055	Diarrhea	1	2020-08-30	2020-09-01	Highly Possible related	Recovering	No	No change
055	Diarrhea	1	2020-09-04	2020-09-04	Highly Possible related	Recovering	No	No change
055	Diarrhea	1	2020-09-07	2020-09-07	Highly Possible related	Recovering	No	No change
055	Diarrhea	1	2020-09-10	2020-09-10	Highly Possible related	Recovering	No	No change
055	Diarrhea	1	2020-09-17	2020-09-17	Highly Possible related	Recovering	No	No change
055	Diarrhea	1	2020-09-22	2020-09-23	Highly Possible related	Recovering	No	No change
055	Diarrhea	1	2020-10-01	2020-10-01	Highly Possible related	Recovering	No	No change
055	Diarrhea	1	2020-10-07	2020-10-07	Highly Possible related	Recovering	No	No change
055	Diarrhea	1	2020-10-15	2020-10-15	Highly Possible related	Recovering	No	No change
055	Diarrhea	1	2020-10-17	2020-10-17	Highly Possible related	Recovering	No	No change
055	Diarrhea	1	2020-10-20	2020-10-21	Highly Possible related	Recovering	No	No change
055	Diarrhea	1	2020-10-27	2020-10-28	Highly Possible related	Recovering	No	No change
055	Diarrhea	1	2020-11-01	2020-11-01	Highly Possible related	Recovering	No	No change
055	Diarrhea	1	2020-11-10	2020-11-11	Highly Possible related	Recovering	No	No change
055	Diarrhea	1	2020-11-13	2020-11-14	Highly Possible related	Recovering	No	No change
055	Diarrhea	1	2020-11-25	2020-11-26	Highly Possible related	Recovering	No	No change
055	淋巴系数降低	1	2020-12-09	2020-12-09	Possible related	Recovering	No	No change
055	Diarrhea	2	2020-12-12	2021-04-13	Highly Possible related	Recovering	No	No change
055	Diarrhea	1	2020-12-15	2020-12-15	Highly Possible related	Recovering	No	No change
055	Diarrhea	2	2020-12-17	2020-12-18	Highly Possible related	Recovering	No	Interruption
055	Diarrhea	1	2020-12-25	2020-12-25	Highly Possible related	Recovering	No	No change
055	Diarrhea	1	2021-01-05	2021-01-05	Highly Possible related	Recovering	No	No change
055	Diarrhea	1	2021-01-26	2021-01-27	Highly Possible related	Recovering	No	No change
055	Diarrhea	1	2021-02-23	2021-02-24	Highly Possible related	Recovering	No	No change
055	Diarrhea	1	2021-02-26	2021-02-27	Highly Possible related	Recovering	No	No change
055	Diarrhea	1	2021-03-05	2021-03-06	Highly Possible related	Recovering	No	No change
055	Diarrhea	1	2021-03-16	2021-03-16	Highly Possible related	Recovering	No	No change
055	Diarrhea	1	2021-03-21	2021-03-21	Highly Possible related	Recovering	No	No change
056	Diarrhea	2	2020-04-25	2020-06-15	Highly Possible related	Recovering	No	No change
056	Abdominal distension	1	2020-04-28	2020-06-02	Possible related	Recovery	No	No change
056	Nausea	1	2020-04-29	2020-04-30	Possible related	Recovery	No	No change
056	Fatigue	1	2020-05-01	2020-06-22	Possible related	Recovery	No	No change
056	Dizziness	1	2020-05-01	2020-05-02	Possible related	Recovery	No	No change
056	Nausea	1	2020-05-04	2020-05-05	Possible related	Recovery	No	No change
056	Nausea	1	2020-05-09	2020-05-14	Possible related	Recovery	No	No change
056	Hand-foot syndrome	2	2020-05-09	2020-06-21	Possible related	Recovery	No	No change
056	Dizziness	1	2020-05-16	2020-05-20	Possible related	Recovery	No	No change
056	Diarrhea	1	2020-06-16	2020-06-20	Highly Possible related	Recovery	No	No change
056	Abdominal distension	1	2020-06-19	2020-06-22	Possible related	Recovery	No	No change
056	低钠血症	1	2020-07-06	2020-10-06	Possible related	Recovering	No	No change
057	Diarrhea	1	2020-04-29	2020-05-05	Highly Possible related	No change	No	No change
057	Diarrhea	2	2020-05-06	2020-05-15	Highly Possible related	Recovery	No	No change
057	Diarrhea	2	2020-05-16	2020-06-22	Highly Possible related	Recovery	No	No change
057	Hand-foot syndrome	1	2020-05-19	2020-05-25	Possible related	Recovery	No	No change
057	Diarrhea	2	2020-06-23	2020-07-27	Highly Possible related	Recovery	No	No change
057	Hand-foot syndrome	1	2020-06-23	2020-06-23	Possible related	Recovery	No	No change
057	Diarrhea	3	2020-08-06	2020-08-07	Highly Possible related	Recovery	No	No change
057	Diarrhea	2	2020-08-11	2020-08-16	Highly Possible related	Recovery	No	No change
057	Diarrhea	2	2020-08-18	2020-08-24	Highly Possible related	Recovery	No	No change
057	Diarrhea	2	2020-12-08	2020-12-08	Highly Possible related	Recovering	No	No change
057	Diarrhea	3	2020-12-09	2020-12-09	Highly Possible related	Deterioration of condition	No	No change
057	Diarrhea	2	2020-12-11	2020-12-12	Highly Possible related	Recovering	No	No change
057	Diarrhea	2	2020-12-14	2020-12-14	Highly Possible related	Recovering	No	No change
057	Diarrhea	2	2020-12-16	2020-12-17	Highly Possible related	Recovering	No	No change
057	Diarrhea	2	2020-12-19	2020-12-19	Highly Possible related	Recovering	No	No change
057	Diarrhea	1	2020-12-21	2020-12-21	Highly Possible related	Recovery	No	No change
057	Diarrhea	2	2020-12-24	2020-12-24	Highly Possible related	Recovering	No	No change
057	Diarrhea	2	2020-12-26	2020-12-26	Highly Possible related	Recovering	No	No change
057	Diarrhea	2	2020-12-29	2020-12-30	Highly Possible related	Recovering	No	No change
057	Diarrhea	1	2020-12-31	2020-12-31	Highly Possible related	Recovery	No	No change
057	Diarrhea	2	2021-01-01	2021-01-04	Highly Possible related	Recovering	No	No change
059	Lymphocyte count decreased	1	2020-05-05		Not related	Recovering	No	No change
059	Hyperuricemia	1	2020-05-05		Not related	Recovering	No	No change
059	Fatigue	2	2020-05-07		Possible related	Recovery	No	No change
059	Bloating痛	2	2020-05-09		Possible related	Recovery	No	No change
059	Diarrhea	2	2020-05-09		Highly Possible related	Recovery	No	No change
060	Lymphocyte count decreased	1	2020-05-05	2020-06-03	Not related	Recovery	No	No change
060	White blood cell count decreased	1	2020-05-05	2020-06-03	Not related	Recovery	No	No change
060	Diarrhea	1	2020-05-12	2020-06-07	Highly Possible related	Recovery	No	No change
060	Diarrhea	1	2020-06-08	2020-06-24	Highly Possible related	Recovery	No	No change
060	Diarrhea	1	2020-06-29	2020-07-19	Highly Possible related	Recovery	No	No change
060	Diarrhea	1	2020-07-21	2021-01-17	Highly Possible related	Recovering	No	No change
060	Lymphocyte count decreased	1	2020-08-25		Possible related	Recovering	No	No change
060	Hyperuricemia	1	2020-08-25	2021-04-07	Possible no relation	Recovering	No	No change
061	Nausea	1	2020-05-16	2020-06-11	Possible related	Recovery	No	Interruption
061	Diarrhea	2	2020-05-16	2020-05-18	Highly Possible related	Recovery	No	Interruption
061	Diarrhea	2	2020-06-09	2020-06-11	Highly Possible related	Recovery	No	Reduction
061	Diarrhea	1	2020-06-13	2020-07-03	Highly Possible related	Recovery	No	Increase
061	Fatigue	1	2020-06-13	2020-06-26	Possible related	Recovery	No	Increase
061	Dizziness	1	2020-06-13	2020-06-26	Possible related	Recovery	No	Increase
061	Nausea	1	2020-06-13	2020-07-10	Possible related	Recovering	No	Increase
061	Fatigue	1	2020-07-07		Possible related	Recovery	No	No change
061	Nausea	1	2020-07-13		Possible related	Recovering	No	No change
061	Dizziness	1	2020-07-27	2020-07-27	Possible related	Recovery	No	No change
061	Diarrhea	1	2020-08-11		Highly Possible related	Recovery	No	Interruption
062	Diarrhea	1	2020-05-23	2020-05-23	Highly Possible related	Recovering	No	No change
062	Diarrhea	2	2020-05-24	2020-05-29	Highly Possible related	Recovering	No	No change
062	Diarrhea	1	2020-05-30	2020-06-02	Highly Possible related	Recovering	No	No change
062	Diarrhea	1	2020-06-06	2020-06-19	Highly Possible related	Recovering	No	No change
062	Fatigue	1	2020-05-30	2020-06-24	Possible related	Recovery	No	No change
062	Nausea	1	2020-05-30	2020-06-03	Possible related	Recovery	No	No change
062	Nausea	1	2020-06-06	2020-06-16	Possible related	Recovery	No	No change
062	Nausea	1	2020-06-17	2020-06-19	Possible related	Recovery	No	No change
062	Nausea	1	2020-06-20	2020-07-20	Possible related	Recovery	No	No change
062	Fatigue	1	2020-06-20	2020-07-20	Possible related	Recovery	No	No change
062	Diarrhea	1	2020-06-20	2020-07-22	Highly Possible related	Recovery	No	No change
062	Diarrhea	1	2020-08-13	2020-08-13	Highly Possible related	Recovery	No	No change
062	Diarrhea	1	2020-08-25	2020-08-27	Highly Possible related	Recovery	No	No change
062	Diarrhea	1	2020-08-31	2020-09-03	Highly Possible related	Recovery	No	No change
062	Diarrhea	2	2020-09-07	2020-09-08	Highly Possible related	Recovery	No	No change
062	Anemia	1	2021-06-08		Possible related	Recovering	No	Discontinuation
063	Diarrhea	2	2020-05-28		Highly Possible related	Recovering	No	Reduction
063	Diarrhea	3	2020-08-27	2020-08-27	Highly Possible related	Recovering	No	No change
063	Diarrhea	2	2020-08-28	2020-08-28	Highly Possible related	Recovery	No	No change
063	Diarrhea	1	2020-08-31	2020-08-31	Highly Possible related	Recovery	No	No change
063	Diarrhea	3	2020-09-02	2020-09-02	Highly Possible related	Recovering	No	No change
063	Diarrhea	2	2020-09-03	2020-09-03	Highly Possible related	Recovering	No	No change
063	Diarrhea	3	2020-09-04	2020-09-04	Highly Possible related	Recovering	No	No change
063	Diarrhea	2	2020-09-10	2020-09-10	Highly Possible related	Recovering	No	No change
063	Diarrhea	2	2020-09-15	2020-09-15	Highly Possible related	Recovering	No	No change
063	Diarrhea	1	2020-09-16	2020-09-16	Highly Possible related	Recovering	No	No change
063	Diarrhea	2	2020-09-17	2020-09-17	Highly Possible related	Recovering	No	No change
063	Diarrhea	2	2020-10-01	2020-10-01	Highly Possible related	Recovering	No	No change
063	Diarrhea	1	2020-10-02	2020-10-03	Highly Possible related	Recovering	No	No change
063	Diarrhea	1	2020-10-10	2020-10-10	Highly Possible related	Recovering	No	No change
063	Diarrhea	2	2020-10-11	2020-10-12	Highly Possible related	Recovering	No	No change
063	Diarrhea	1	2020-10-14	2020-10-15	Highly Possible related	Recovery	No	No change
063	Diarrhea	1	2020-10-28	2020-10-28	Highly Possible related	Recovering	No	No change
063	Diarrhea	1	2020-11-01	2020-11-01	Highly Possible related	Recovering	No	No change
063	Diarrhea	2	2020-11-02	2020-11-02	Highly Possible related	Recovering	No	No change
063	Diarrhea	1	2020-11-03	2020-11-03	Highly Possible related	Recovering	No	No change
063	Diarrhea	2	2020-11-04	2020-11-08	Highly Possible related	Recovering	No	No change
063	Diarrhea	1	2020-11-09	2020-11-09	Highly Possible related	Recovering	No	No change
063	Diarrhea	1	2020-11-17	2020-11-18	Highly Possible related	Recovering	No	No change
063	Diarrhea	1	2020-11-25	2020-11-25	Highly Possible related	Recovery	No	No change
063	Diarrhea	1	2020-12-02	2020-12-02	Highly Possible related	Recovering	No	No change
063	Diarrhea	2	2021-03-11	2021-03-11	Highly Possible related	Recovering	No	No change
063	Diarrhea	1	2021-03-15	2021-03-15	Highly Possible related	Recovery	No	No change
063	Diarrhea	1	2021-03-17	2021-03-19	Highly Possible related	Recovery	No	No change
063	Diarrhea	2	2021-03-26	2021-03-26	Highly Possible related	Recovering	No	No change
063	Diarrhea	2	2021-04-04	2021-04-04	Highly Possible related	Recovering	No	No change
063	Diarrhea	2	2021-04-09	2021-04-09	Highly Possible related	Recovering	No	No change
063	Diarrhea	2	2021-04-12	2021-04-12	Highly Possible related	Recovering	No	No change
063	Diarrhea	1	2021-04-13	2021-04-13	Highly Possible related	Recovery	No	No change
063	Diarrhea	2	2021-04-15	2021-04-15	Highly Possible related	Recovering	No	No change
063	Diarrhea	1	2021-04-18	2021-04-18	Highly Possible related	Recovery	No	No change
063	Diarrhea	1	2021-04-22	2021-04-22	Highly Possible related	Recovery	No	No change
063	Diarrhea	2	2021-05-03	2021-05-03	Highly Possible related	Recovering	No	No change
063	Diarrhea	1	2021-05-15	2021-05-15	Highly Possible related	Recovery	No	No change
063	Diarrhea	2	2021-05-23	2021-05-23	Highly Possible related	Recovering	No	No change
063	Diarrhea	1	2021-05-27	2021-05-27	Highly Possible related	Recovery	No	No change
064	Lymphocyte count decreased	1	2020-06-02	2021-05-27	Not related	Recovering	No	No change
064	Diarrhea	2	2020-06-04	2020-06-12	Highly Possible related	Recovery	No	No change
064	Hyperuricemia	1	2020-08-25	2021-02-18	Possible related		No	No change
064	Fatigue	1	2020-06-03	2020-06-03	Possible no relation	Recovery	No	No change
064	Fatigue	1	2020-06-15	2020-06-16	Possible no relation	Recovery	No	No change
064	Bloating	1	2020-06-16	2020-06-16	Possible no relation	Recovery	No	No change
064	Diarrhea	1	2020-06-20	2020-06-20	Highly Possible related	Recovering	No	No change
064	Diarrhea	1	2020-06-22	2020-06-22	Highly Possible related	Recovering	No	No change
064	Diarrhea	1	2020-06-24	2020-06-24	Highly Possible related	Recovering	No	No change
064	Diarrhea	1	2020-06-28	2020-06-28	Highly Possible related	Recovery	No	No change
064	Fatigue	1	2020-07-02	2020-07-07	Possible related	Recovering	No	No change
064	Nausea	1	2020-07-02	2020-07-07	Possible related	Recovering	No	No change
064	Fatigue	1	2020-07-10	2020-07-14	Possible related	Recovering	No	No change
064	Nausea	1	2020-07-15	2020-07-23	Possible related	Recovery	No	No change
064	Fatigue	1	2020-07-17	2020-07-20	Possible related	Recovery	No	No change
064	Diarrhea	1	2020-08-03	2020-08-04	Highly Possible related	Recovery	No	No change
064	Hand-foot syndrome	2	2020-08-27	2020-08-31	Possible related	Recovery	No	No change
064	Diarrhea	1	2020-11-02	2020-11-02	Highly Possible related	Recovery	No	No change
064	低磷酸血症	1	2020-11-19	2021-05-27	Possible no relation	Recovering	No	No change
064	Anemia	1	2021-02-18	2021-05-27	Possible no relation	Recovering	No	No change
064	Hyperuricemia	1	2021-05-27		Possible no relation	Recovering	No	Discontinuation
065	Neutrophil count decreased	1	2020-05-19		Not related	Recovering	No	No change
065	Diarrhea	2	2020-06-05		Highly Possible related	Recovering	No	No change
065	Cold	2	2020-08-09	2020-08-19	Possible no relation	Recovery	No	Interruption
066	Lymphocyte count decreased	1	2020-06-08		Not related	Recovering	No	No change
066	Diarrhea	2	2020-06-19	2020-06-26	Highly Possible related	Recovery	No	Discontinuation
066	Vomiting	2	2020-06-19	2020-06-26	Possible related	Recovery	No	Discontinuation
067	Diarrhea	1	2020-07-07	2020-07-08	Highly Possible related	Recovery	No	No change
067	Hand-foot syndrome	2	2020-07-18	2020-07-19	Possible related	Recovery	No	No change
067	Hand-foot syndrome	2	2020-07-20	2020-08-02	Possible related	Recovery	No	Interruption
067	Hyperuricemia	1	2020-09-08	2020-12-08	Possible no relation	Recovering	No	No change
067	Diarrhea	1	2020-08-16	2020-08-16	Highly Possible related	Recovery	No	No change
067	Hand-foot syndrome	2	2020-08-16	2020-10-17	Possible related	Recovery	No	No change
067	Hand-foot syndrome	2	2020-11-29	2021-01-02	Possible related	Recovering	No	No change
067	Decreased platelet count	1	2020-12-08	2021-03-09	Possible no relation	Recovering	No	No change
068	Diarrhea	3	2020-06-30	2020-07-20	Highly Possible related	Recovery	Yes	Discontinuation
068	Vomiting	2	2020-07-01	2020-07-20	Possible related	Recovery	Yes	Discontinuation
069	Lymphocyte count decreased	2	2020-07-07	2020-12-28	Not related	Recovering	No	No change
069	Diarrhea	2	2020-07-14	2020-07-15	Highly Possible related	Recovering	No	No change
069	Diarrhea	1	2020-07-16	2020-07-17	Highly Possible related	Recovery	No	No change
069	Diarrhea	1	2020-07-19	2020-07-19	Highly Possible related	Recovery	No	No change
069	Diarrhea	2	2020-07-20	2020-07-20	Highly Possible related	Deterioration of condition	No	No change
069	Diarrhea	2	2020-07-22	2020-07-22	Highly Possible related	Deterioration of condition	No	No change
069	Diarrhea	3	2020-07-23	2020-07-23	Highly Possible related	Deterioration of condition	No	No change
069	Diarrhea	1	2020-07-24	2020-07-25	Highly Possible related	Recovery	No	No change
069	Diarrhea	1	2020-07-27	2020-07-27	Highly Possible related	Recovery	No	No change
069	Diarrhea	2	2020-07-28	2020-07-28	Highly Possible related	Recovery	No	No change
069	Diarrhea	1	2020-07-29	2020-07-29	Highly Possible related	Recovery	No	No change
069	Diarrhea	2	2020-07-31	2020-07-31	Highly Possible related	Deterioration of condition	No	No change
069	Diarrhea	1	2020-08-02	2020-08-03	Highly Possible related	Recovery	No	No change
069	Diarrhea	1	2020-08-07	2020-08-07	Highly Possible related	Recovery	No	No change
069	Diarrhea	1	2020-08-13	2020-08-14	Highly Possible related	Recovery	No	No change
069	Diarrhea	2	2020-08-15	2020-08-15	Highly Possible related	Deterioration of condition	No	No change
069	Diarrhea	1	2020-08-17	2020-08-21	Highly Possible related	Recovery	No	No change
069	Diarrhea	2	2020-08-22	2020-08-22	Highly Possible related	Deterioration of condition	No	No change
069	Diarrhea	2	2020-08-25	2020-08-25	Highly Possible related	Deterioration of condition	No	No change
069	Diarrhea	1	2020-08-26	2020-08-27	Highly Possible related	Recovery	No	No change
069	Diarrhea	1	2020-08-29	2020-08-31	Highly Possible related	Recovery	No	No change
069	Diarrhea	1	2020-09-02	2020-09-02	Highly Possible related	Recovery	No	No change
069	Diarrhea	1	2020-09-04	2020-09-06	Highly Possible related	Recovery	No	No change
069	Diarrhea	2	2020-09-07	2020-09-08	Highly Possible related	Deterioration of condition	No	No change
069	Diarrhea	1	2020-09-12	2020-09-12	Highly Possible related	Recovery	No	No change
069	Diarrhea	2	2020-09-13	2020-09-13	Highly Possible related	Deterioration of condition	No	No change
069	Diarrhea	1	2020-09-18	2020-09-18	Highly Possible related	Recovery	No	No change
069	Diarrhea	1	2020-09-25	2020-09-28	Highly Possible related	Recovery	No	No change
069	Diarrhea	1	2020-10-05	2020-10-06	Highly Possible related	Recovery	No	No change
069	Diarrhea	1	2020-10-09	2020-10-09	Highly Possible related	Recovery	No	No change
069	Diarrhea	1	2020-10-29	2020-10-30	Highly Possible related	Recovery	No	No change
069	Diarrhea	1	2020-12-20	2020-12-20	Highly Possible related	Recovery	No	No change
069	Diarrhea	1	2020-12-27	2020-12-27	Highly Possible related	Recovery	No	No change
069	Increased creatinine	1	2020-12-28		Possible no relation	Recovery	No	No change
069	Diarrhea	2	2021-01-02	2021-01-02	Highly Possible related	Recovery	No	No change
069	Diarrhea	1	2021-01-11	2021-01-11	Highly Possible related	Recovery	No	No change
069	Diarrhea	1	2021-01-29	2021-01-29	Highly Possible related	Recovery	No	No change
069	Diarrhea	1	2021-02-11	2021-02-12	Highly Possible related	Recovery	No	No change
069	Diarrhea	1	2021-03-17	2021-03-17	Highly Possible related	Recovery	No	No change
069	Diarrhea	2	2021-03-18	2021-03-18	Highly Possible related	Recovery	No	No change
069	Diarrhea	1	2021-03-19	2021-03-22	Highly Possible related	Recovery	No	No change
070	Lymphocyte count decreased	2	2020-07-15	2020-12-08	Not related	Recovering	No	No change
071	Lymphocyte count decreased	2	2020-07-09		Not related	Recovering	No	No change
071	White blood cell count decreased	1	2020-07-09		Not related	Recovering	No	No change
071	Hypophosphatemia	1	2020-12-08		Possible no relation	Recovering	No	No change
072	Hyperuricemia	1	2020-07-22	2021-01-15	Not related	Recovering	No	No change
072	Hand-foot syndrome	1	2020-11-04	2020-11-17	Possible related	Recovering	No	No change
072	Diarrhea	1	2020-09-30	2021-01-30	Highly Possible related	Recovery	No	No change
072	Increased platelet count	1	2021-01-15		Possible no relation	Recovery	No	No change
073	Dizziness	1	2020-10-03	2020-10-05	Possible related	Recovery	No	No change
073	Fatigue	1	2020-10-03	2020-10-05	Possible related	Recovery	No	No change
073	Nausea	1	2020-10-06	2020-10-06	Possible related	Recovery	No	No change
073	Nausea	1	2020-10-11	2020-10-11	Possible related	Recovery	No	No change
073	Hand-foot syndrome	1	2020-10-23	2020-11-03	Possible related	Recovery	No	No change
073	Diarrhea	2	2020-10-30	2020-10-31	Highly Possible related	Recovery	No	No change
073	Diarrhea	1	2020-11-01	2020-11-01	Highly Possible related	Recovery	No	No change
073	Diarrhea	2	2020-12-06	2020-12-10	Highly Possible related	Recovery	No	No change
073	Diarrhea	2	2020-12-16	2020-12-18	Highly Possible related	Recovery	No	No change
073	Diarrhea	2	2020-12-21	2020-12-23	Highly Possible related	Recovery	No	No change
073	Anemia	1	2021-06-30		Possible no relation	Recovering	No	No change
074	丙氨酸转移酶增高	1	2020-09-10		Not related	Recovering	No	No change
074	Diarrhea	1	2020-09-16	2020-09-18	Highly Possible related	Recovery	No	No change
074	Diarrhea	2	2020-09-19	2020-09-20	Highly Possible related	Recovery	No	No change
074	Diarrhea	1	2020-09-21	2020-09-29	Highly Possible related	Recovery	No	No change
074	Diarrhea	2	2020-09-30	2020-09-30	Highly Possible related	Recovery	No	No change
074	Diarrhea	1	2020-10-01	2020-10-03	Highly Possible related	Recovery	No	No change
074	Diarrhea	2	2020-10-04	2020-10-04	Highly Possible related	Recovery	No	No change
074	Diarrhea	1	2020-10-05	2020-10-07	Highly Possible related	Recovery	No	No change
074	Diarrhea	2	2020-10-08	2020-10-09	Highly Possible related	Recovery	No	No change
074	Diarrhea	1	2020-10-10	2020-10-15	Highly Possible related	Recovery	No	No change
074	Diarrhea	2	2020-10-16	2020-10-17	Highly Possible related	Recovery	No	No change
074	Diarrhea	1	2020-10-18	2020-11-09	Highly Possible related	Recovery	No	No change
074	Diarrhea	2	2020-11-10	2020-11-10	Highly Possible related	Recovery	No	No change
074	Diarrhea	1	2020-11-11	2020-11-13	Highly Possible related	Recovery	No	No change
074	Diarrhea	2	2020-11-14	2020-11-14	Highly Possible related	Recovery	No	No change
074	Diarrhea	1	2020-11-15	2020-11-17	Highly Possible related	Recovery	No	No change
074	Diarrhea	2	2020-11-18	2020-11-18	Highly Possible related	Recovery	No	No change
074	Diarrhea	1	2020-11-19	2020-11-23	Highly Possible related	Recovery	No	No change
074	Diarrhea	2	2020-11-24	2020-11-24	Highly Possible related	Recovery	No	No change
074	Diarrhea	1	2020-11-25	2020-11-25	Highly Possible related	Recovery	No	No change
074	Hand-foot syndrome	1	2020-09-25	2020-09-27	Possible related	Recovery	No	No change
074	Hand-foot syndrome	2	2020-10-05	2020-10-08	Possible related	Recovery	No	No change
074	Hand-foot syndrome	2	2020-11-26	2020-11-30	Possible related	Recovery	No	No change
074	Hand-foot syndrome	2	2020-10-12	2020-10-15	Possible related	Recovery	No	No change
074	Dizziness	1	2020-12-03	2020-12-07	Possible related	Recovering	No	No change
074	Dizziness	1	2020-12-06	2020-12-06	Possible related	Recovering	No	No change
074	Nausea	1	2020-12-07	2020-12-08	Possible related	Recovering	No	No change
074	Diarrhea	1	2020-12-09	2020-12-14	Highly Possible related	Recovering	No	No change
074	Hand-foot syndrome	2	2020-12-11	2020-12-26	Possible related	Recovery	No	No change
074	Diarrhea	1	2020-12-13	2020-12-15	Highly Possible related	Recovering	No	No change
074	背部酸痛	1	2020-12-17	2020-12-21	Possible related	Recovering	No	No change
074	Headache	1	2020-12-20	2020-12-21	Possible related	Recovering	No	No change
074	Diarrhea	1	2020-12-20	2020-12-21	Highly Possible related	Recovering	No	No change
074	Dizziness	1	2020-12-22	2020-12-22	Possible related	Recovering	No	No change
074	Headache	1	2020-12-25	2020-12-25	Possible related	Recovering	No	No change
074	Dizziness	1	2020-12-26	2020-12-26	Possible related	Recovering	No	No change
074	Hand-foot syndrome	2	2021-01-21	2021-01-27	Possible related	Recovering	No	No change
074	背痛	1	2021-02-25	2021-04-19	Possible related	Recovery	No	No change
074	Diarrhea	45659	2021-02-25	2021-04-19	Highly Possible related	Recovering	No	No change
074	Dizziness	1	2021-04-20	2021-04-21	Possible related	Recovery	No	No change
074	Headache	1	2021-04-23	2021-04-23	Possible related	Recovery	No	No change
074	Diarrhea	1	2021-04-25	2021/4/256	Possible related	Recovery	No	No change
075	Elevated alanine aminotransferase	1	2020-09-04	2021-03-19	Not related	Recovering	No	No change
075	高钙血症	1	2020-09-04	2021-03-19	Not related	Recovering	No	No change
075	Diarrhea	1	2020-09-04	2020-09-05	Highly Possible related	Recovering	No	No change
075	Diarrhea	2	2020-09-06	2020-09-07	Highly Possible related	Recovering	No	No change
075	Diarrhea	1	2020-09-08	2020-09-10	Highly Possible related	Recovering	No	No change
075	Diarrhea	2	2020-09-11	2020-09-12	Highly Possible related	Recovering	No	No change
075	Diarrhea	1	2020-09-13	2020-09-13	Highly Possible related	Recovering	No	No change
075	Diarrhea	2	2020-09-14	2020-10-05	Highly Possible related	Recovering	No	No change
075	Diarrhea	1	2020-10-06	2020-10-06	Highly Possible related	Recovering	No	No change
075	Diarrhea	2	2020-10-07	2020-10-09	Highly Possible related	Recovering	No	No change
075	Diarrhea	1	2020-10-10	2020-10-10	Highly Possible related	Recovering	No	No change
075	Diarrhea	2	2020-10-11	2020-10-14	Highly Possible related	Recovering	No	No change
075	Diarrhea	1	2020-10-15	2020-10-15	Highly Possible related	Recovering	No	No change
075	Diarrhea	2	2020-10-16	2020-10-18	Highly Possible related	Recovering	No	No change
075	Diarrhea	1	2020-10-19	2020-11-07	Highly Possible related	Recovering	No	No change
075	Diarrhea	2	2020-11-08	2020-11-08	Highly Possible related	Recovering	No	No change
075	Diarrhea	1	2020-11-09	2020-11-11	Highly Possible related	Recovering	No	Interruption
075	Diarrhea	2	2020-11-12	2020-11-12	Highly Possible related	Recovering	No	No change
075	Diarrhea	1	2020-11-13	2021-02-18	Highly Possible related	Recovering	No	No change
075	Lymphocyte count decreased	1	2020-12-18	2021-03-19	Possible related	Recovering	No	No change
075	Diarrhea	1	2021-04-16	2021-04-25	Highly Possible related	Recovery	No	No change
075	Diarrhea	1	2021-04-27	2021-05-05	Highly Possible related	Recovering	No	No change
075	Diarrhea	1	2021-05-07	2021-05-10	Highly Possible related	Recovering	No	No change
075	Diarrhea	1	2021-05-12	2021-05-17	Highly Possible related	Recovering	No	No change
075	Diarrhea	1	2021-05-19	2021-05-29	Highly Possible related	Recovering	No	No change
075	Diarrhea	1	2021-05-31	2021-06-23	Highly Possible related	Recovering	No	No change
075	Diarrhea	1	2021-05-25	2021-06-29	Highly Possible related	Recovering	No	No change
075	Diarrhea	1	2021-07-01	2021-07-07	Highly Possible related	Recovering	No	No change
075	Hyperuricemia	1	2021-07-08				No	No change
076	Hyperuricemia	1	2020-10-09	2021-03-18	Not related	Recovering	No	No change
076	Anemia	1	2020-10-09	2021-03-18	Not related	Recovering	No	No change
076	Increased aspartate aminotransferase	1	2020-10-09	2021-03-18	Not related	Recovering	No	No change
076	Diarrhea	1	2020-10-11	2020-10-11	Highly Possible related	Recovering	No	No change
076	Elevated creatinine	1	2020-12-09		Possible no relation	Recovering	No	No change
076	Lymphocyte count decreased	1	2020-12-09		Possible related	Recovering	No	No change
077	丙氨酸转移酶增高	1	2020-10-13		Not related	Recovering	No	No change
077	Diarrhea	1	2020-10-25	2020-10-26	Highly Possible related	Recovering	No	No change
077	Diarrhea	1	2020-10-29	2020-10-30	Highly Possible related	Recovering	No	No change
078	丙氨酸转移酶增高	1	2020-10-19	2021-08-11	Not related	Recovering	No	No change
078	Diarrhea	2	2020-11-01	2020-11-02	Highly Possible related	Recovering	No	No change
078	Diarrhea	2	2020-11-04	2020-11-04	Highly Possible related	Recovering	No	No change
078	Diarrhea	2	2020-11-06	2020-11-06	Highly Possible related	Recovering	No	No change
078	Diarrhea	2	2020-11-08	2020-11-08	Highly Possible related	Recovering	No	No change
078	Diarrhea	2	2020-11-10	2020-11-10	Highly Possible related	Recovering	No	No change
078	Diarrhea	1	2020-11-12	2020-11-12	Highly Possible related	Recovering	No	No change
078	Diarrhea	2	2020-11-14	2020-11-14	Highly Possible related	Recovering	No	No change
078	Diarrhea	1	2020-11-15	2020-11-15	Highly Possible related	Recovering	No	No change
078	Diarrhea	1	2020-11-17	2020-11-17	Highly Possible related	Recovering	No	No change
078	Diarrhea	2	2020-11-19	2020-11-19	Highly Possible related	Recovering	No	No change
078	Diarrhea	2	2020-11-21	2020-11-21	Highly Possible related	Recovering	No	No change
078	Diarrhea	1	2020-11-22	2020-11-22	Highly Possible related	Recovering	No	No change
078	Diarrhea	2	2020-11-24	2020-11-24	Highly Possible related	Recovering	No	No change
078	Diarrhea	1	2020-11-26	2020-11-26	Highly Possible related	Recovering	No	No change
078	Diarrhea	2	2020-11-28	2020-11-29	Highly Possible related	Recovering	No	No change
078	Diarrhea	2	2020-12-01	2020-12-01	Highly Possible related	Recovering	No	No change
078	Diarrhea	1	2020-12-03	2020-12-03	Highly Possible related	Recovering	No	No change
078	Diarrhea	2	2020-12-05	2020-12-05	Highly Possible related	Recovering	No	No change
078	Diarrhea	2	2020-12-07	2020-12-07	Highly Possible related	Recovering	No	No change
078	Diarrhea	1	2020-12-09	2020-12-09	Highly Possible related	Recovering	No	No change
078	Diarrhea	1	2020-12-11	2020-12-11	Highly Possible related	Recovering	No	No change
078	Diarrhea	2	2020-12-13	2020-12-13	Highly Possible related	Recovering	No	No change
078	Diarrhea	2	2020-12-15	2020-12-15	Highly Possible related	Recovering	No	No change
078	Diarrhea	1	2020-12-17	2020-12-19	Highly Possible related	Recovering	No	No change
078	Diarrhea	2	2020-12-21	2020-12-21	Highly Possible related	Recovering	No	No change
078	Diarrhea	2	2020-12-25	2020-12-25	Highly Possible related	Recovering	No	No change
078	Diarrhea	1	2020-12-27	2020-12-28	Highly Possible related	Recovering	No	No change
078	Diarrhea	2	2020-12-30	2020-12-30	Highly Possible related	Recovering	No	No change
078	Diarrhea	1	2021-01-02	2021-01-02	Highly Possible related	Recovering	No	No change
078	Diarrhea	1	2021-01-02	2021-01-04	Highly Possible related	Recovering	No	No change
078	Diarrhea	1	2021-01-06	2021-01-06	Highly Possible related	Recovering	No	No change
078	Diarrhea	2	2021-01-08	2021-01-06	Highly Possible related	Recovering	No	No change
078	Diarrhea	1	2021-01-10	2021-01-10	Highly Possible related	Recovering	No	No change
078	Diarrhea	2	2021-01-12	2021-01-12	Highly Possible related	Recovering	No	No change
078	Diarrhea	1	2021-01-14	2021-01-14	Highly Possible related	Recovering	No	No change
078	Diarrhea	1	2021-06-29	2021-06-29	Highly Possible related	Recovering	No	No change
078	Diarrhea	1	2021-07-01	2021-07-01	Highly Possible related	Recovering	No	No change
078	Diarrhea	1	2021-07-03	2021-07-03	Highly Possible related	Recovering	No	No change
078	Diarrhea	1	2021-07-05	2021-07-05	Highly Possible related	Recovering	No	No change
078	Diarrhea	1	2021-07-07	2021-07-07	Highly Possible related	Recovering	No	No change
078	Diarrhea	1	2021-07-09	2021-07-09	Highly Possible related	Recovering	No	No change
078	Diarrhea	1	2021-07-11	2021-07-11	Highly Possible related	Recovering	No	No change
078	Diarrhea	1	2021-07-13	2021-07-13	Highly Possible related	Recovering	No	No change
078	Diarrhea	1	2021-07-15	2021-07-15	Highly Possible related	Recovering	No	No change
078	Diarrhea	1	2021-07-17	2021-07-17	Highly Possible related	Recovering	No	No change
078	Diarrhea	1	2021-07-19	2021-07-19	Highly Possible related	Recovering	No	No change
078	Diarrhea	1	2021-07-21	2021-07-21	Highly Possible related	Recovering	No	No change
078	Diarrhea	1	2021-07-29	2021-07-29	Highly Possible related	Recovering	No	No change
079	高镁血症	1	2020-11-02	2021-04-23	Not related	Recovering	No	No change
079	Diarrhea	1	2020-11-02		Not related	Recovering	No	No change
079	Hand-foot syndrome	2	2020-12-30		Possible related	Recovering	No	No change
079	Diarrhea	1	2021-01-01	2021-01-02	Highly Possible related	Recovery	No	No change
079	Diarrhea	1	2021-01-04	2021-01-07	Highly Possible related	Recovery	No	No change
079	Diarrhea	1	2021-01-11	2021-01-11	Highly Possible related	Recovery	No	No change
079	Lymphocyte count decreased	1	2021-04-23		Possible no relation	Recovery	No	No change
080	Neutrophil count decreased	1	2020-11-02		Not related	Recovering	No	No change
080	White blood cell count decreased	1	2020-11-02		Not related	Recovering	No	No change
080	Increased creatinine	1	2020-11-02		Not related	Recovering	No	No change
080	高镁血症	1	2020-11-02		Not related	Recovering	No	No change
080	Diarrhea	1	2020-11-11	2020-11-13	Highly Possible related	Recovering	No	No change
080	Diarrhea	3	2020-11-14	2020-11-14	Highly Possible related	Recovering	No	No change
080	Diarrhea	1	2020-11-15	2020-11-17	Highly Possible related	Recovering	No	No change
080	Diarrhea	1	2020-11-24	2020-11-26	Highly Possible related	Recovering	No	No change
080	Diarrhea	1	2020-12-05	2020-12-08	Highly Possible related	Recovering	No	No change
080	Diarrhea	1	2020-12-11	2020-12-14	Highly Possible related	Recovering	No	No change
080	Diarrhea	2	2021-01-31	2021-01-31	Highly Possible related	Recovering	No	No change
080	Diarrhea	3	2021-02-01	2021-02-01	Highly Possible related	Recovering	No	No change
080	Diarrhea	1	2021-02-04	2021-02-05	Highly Possible related	Recovering	No	No change
080	Diarrhea	1	2021-02-08	2021-02-09	Highly Possible related	Recovering	No	No change
080	Diarrhea	2	2021-02-10	2021-02-10	Highly Possible related	Recovering	No	No change
080	Diarrhea	1	2021-02-13	2021-02-13	Highly Possible related	Recovering	No	No change
080	Diarrhea	1	2021-02-19	2021-02-19	Highly Possible related	Recovering	No	No change
080	Diarrhea	2	2021-02-22	2021-02-22	Highly Possible related	Recovering	No	No change
080	Diarrhea	2	2021-03-03	2021-03-04	Highly Possible related	Recovering	No	No change
080	Diarrhea	1	2021-03-05	2021-03-07	Highly Possible related	Recovering	No	No change
080	Diarrhea	3	2021-03-10	2021-03-11	Highly Possible related	Recovering	No	No change
080	Diarrhea	2	2021-03-12	2021-03-15	Highly Possible related	Recovering	No	No change
080	Diarrhea	1	2021-03-16	2021-03-17	Highly Possible related	Recovering	No	No change
080	Diarrhea	2	2021-03-18	2021-03-19	Highly Possible related	Recovering	No	No change
080	Diarrhea	3	2021-03-20	2021-03-20	Highly Possible related	Recovering	No	No change
080	Diarrhea	2	2021-03-24	2021-03-24	Highly Possible related	Recovering	No	No change
080	Diarrhea	1	2021-03-25	2021-03-26	Highly Possible related	Recovering	No	No change
080	Diarrhea	1	2021-03-29	2021-03-29	Highly Possible related	Recovering	No	No change
080	Diarrhea	1	2021-03-31	2021-03-31	Highly Possible related	Recovering	No	No change
082	White blood cell count decreased	1	2020-11-17	2021-05-11	Not related	Recovering	No	No change
082	Lymphocyte count decreased	1	2020-11-17	2021-05-11	Not related	Recovering	No	No change
082	Neutrophil count decreased	1	2020-11-17	2021-05-11	Not related	Recovering	No	No change
082	Diarrhea	1	2020-12-20	2020-12-23	Highly Possible related	Recovery	No	No change
082	Diarrhea	1	2020-12-27	2020-12-27	Highly Possible related	Recovery	No	No change
082	Diarrhea	1	2020-12-30	2020-12-31	Highly Possible related	Recovery	No	No change
082	Diarrhea	1	2021-01-09	2021-01-09	Highly Possible related	Recovery	No	No change
082	Diarrhea	1	2021-01-12	2021-01-12	Highly Possible related	Recovery	No	No change
082	Diarrhea	1	2021-01-19	2021-01-19	Highly Possible related	Recovery	No	No change
082	Diarrhea	1	2021-01-23	2021-01-23	Highly Possible related	Recovery	No	No change
082	Diarrhea	1	2021-01-26	2021-01-26	Highly Possible related	Recovery	No	No change
082	Diarrhea	1	2021-01-28	2021-01-28	Highly Possible related	Recovery	No	No change
082	Diarrhea	1	2021-02-02	2021-02-02	Highly Possible related	Recovery	No	No change
082	Diarrhea	1	2021-02-06	2021-02-06	Highly Possible related	Recovery	No	No change
082	Diarrhea	1	2021-02-08	2021-02-08	Highly Possible related	Recovery	No	No change
082	Diarrhea	1	2021-02-10	2021-02-10	Highly Possible related	Recovery	No	No change
082	Diarrhea	1	2021-02-15	2021-02-15	Highly Possible related	Recovery	No	No change
082	Diarrhea	1	2021-02-18	2021-02-18	Highly Possible related	Recovery	No	No change
082	Diarrhea	1	2021-02-25	2021-02-25	Highly Possible related	Recovery	No	No change
082	Diarrhea	1	2021-03-09	2021-03-09	Highly Possible related	Recovery	No	No change
082	Diarrhea	1	2021-03-20	2021-03-20	Highly Possible related	Recovery	No	No change
082	Diarrhea	1	2021-04-22	2021-04-22	Highly Possible related	Recovery	No	No change
082	Diarrhea	1	2021-05-03	2021-05-03	Highly Possible related	Recovery	No	No change
082	天冬氨酸氨基转移酶增高	1	2021-05-11		Possible no relation	Recovering	No	No change
082	Diarrhea	1	2021-07-29	2021-07-29	Highly Possible related	Recovery	No	No change
082	Diarrhea	1	2021-08-01	2021-08-01	Highly Possible related	Recovery	No	No change
082	Diarrhea	1	2021-08-04	2021-08-04	Highly Possible related	Recovery	No	No change
082	Diarrhea	1	2021-08-07	2021-08-07	Highly Possible related	Recovery	No	No change
082	Diarrhea	1	2021-08-09	2021-08-09	Highly Possible related	Recovery	No	No change
082	Diarrhea	1	2021-08-13	2021-08-13	Highly Possible related	Recovery	No	No change
082	Diarrhea	1	2021-08-19	2021-08-19	Highly Possible related	Recovery	No	No change
082	Diarrhea	1	2021-08-22	2021-08-22	Highly Possible related	Recovery	No	No change
082	Diarrhea	1	2021-09-04	2021-09-04	Highly Possible related	Recovery	No	No change
082	Diarrhea	1	2021-09-11	2021-09-11	Highly Possible related	Recovery	No	No change
082	Diarrhea	1	2021-09-13	2021-09-13	Highly Possible related	Recovery	No	No change
082	Diarrhea	1	2021-09-16	2021-09-16	Highly Possible related	Recovery	No	No change
082	Diarrhea	1	2021-09-17	2021-09-17	Highly Possible related	Recovery	No	No change
082	Diarrhea	1	2021-09-28	2021-09-28	Highly Possible related	Recovery	No	No change
082	Diarrhea	1	2021-10-01	2021-10-02	Highly Possible related	Recovery	No	No change
082	Diarrhea	1	2021-10-11	2021-10-11	Highly Possible related	Recovery	No	No change
082	Diarrhea	1	2021-10-13	2021-10-13	Highly Possible related	Recovery	No	No change
082	Diarrhea	1	2021-10-15	2021-10-15	Highly Possible related	Recovery	No	No change
082	Diarrhea	1	2021-10-17	2021-10-18	Highly Possible related	Recovery	No	No change
083	Anemia	1	2020-11-29	2021-02-21	Possible no relation	Recovering	No	No change
083	Hypophosphatemia	1	2021-02-21		Possible no relation	Recovering	No	No change
083	Dizziness	1	2021-02-10	2021-02-14	Possible related	Recovering	No	No change
083	Vomiting	1	2021-02-10	2021-02-12	Possible related	Recovering	No	No change
083	Diarrhea	1	2021-02-10	2021-03-07	Highly Possible related	Recovering	No	No change
083	Hand-foot syndrome	1	2021-02-10	2021-03-07	Possible related	Recovering	No	No change
083	Dizziness	1	2021-02-19	2021-02-20	Possible related	Recovering	No	No change
083	Dizziness	1	2021-03-08	2021-03-09	Possible related	Recovering	No	No change
083	Vomiting	1	2021-03-08	2021-03-09	Possible related	Recovering	No	No change
084	White blood cell count decreased	1	2020-11-06		Not related	Recovering	No	No change
084	Diarrhea	1	2020-12-10		Highly Possible related	Recovering	No	No change
084	Diarrhea	1	2020-12-10		Highly Possible related	Recovering	No	No change
085	Diarrhea	1	2021-02-05	2021-02-13	Highly Possible related	Recovering	No	No change
085	Nausea	1	2021-02-05	2021-02-08	Possible related	Recovering	No	No change
085	Nausea	1	2021-02-11	2021-02-11	Possible related	Recovering	No	No change
085	Nausea	1	2021-02-14	2021-02-14	Possible related	Recovering	No	No change
085	Diarrhea	2	2021-02-15	2021-02-15	Highly Possible related	Recovering	No	No change
085	Diarrhea	1	2021-02-16	2021-02-20	Highly Possible related	Recovering	No	No change
085	Diarrhea	1	2021-02-23	2021-02-23	Highly Possible related	Recovering	No	No change
085	Nausea	1	2021-02-23	2021-02-23	Possible related	Recovering	No	No change
086	Diarrhea	1	2020-12-26	2020-12-31	Highly Possible related	Recovering	No	No change
086	Vomiting	1	2020-12-26	2020-12-31	Possible related	Recovering	No	No change
086	Nausea	1	2020-12-26	2020-12-31	Possible related	Recovering	No	No change
086	Diarrhea	2	2021-01-01	2021-01-01	Highly Possible related	Recovering	No	No change
086	Diarrhea	1	2021-01-02	2021-01-02	Highly Possible related	Recovering	No	No change
086	Diarrhea	1	2021-01-10	2021-01-22	Highly Possible related	Recovering	No	No change
086	Vomiting	1	2021-01-13	2021-01-13	Possible related	Recovering	No	No change
086	Nausea	1	2021-01-13	2021-01-13	Possible related	Recovering	No	No change
086	Hand-foot syndrome	2	2021-01-16	2021-01-01	Possible related	Recovering	No	No change
086	Vomiting	1	2021-01-23	2021-01-26	Possible related	Recovering	No	No change
086	Nausea	1	2021-01-23	2021-01-26	Possible related	Recovering	No	No change
086	Diarrhea	1	2021-02-03	2021-02-10	Highly Possible related	Recovering	No	No change
086	Diarrhea	1	2021-03-02	2021-03-02	Highly Possible related	Recovering	No	No change
086	Diarrhea	1	2021-03-07	2021-03-21	Highly Possible related	Recovering	No	No change
086	Diarrhea	1	2021-03-26	2021-03-31	Highly Possible related	Recovery	No	No change
086	Hand-foot syndrome	2	2021-03-26	2021-03-31	Possible related	Recovering	No	No change
086	Diarrhea	1	2021-04-18	2021-04-18	Highly Possible related	Recovering	No	No change
086	Diarrhea	1	2021-04-21	2021-04-21	Highly Possible related	Recovery	No	No change
086	Hand-foot syndrome	2	2021-04-29	2021-05-22	Possible related	Recovering	No	No change
086	Diarrhea	1	2021-05-03	2021-05-06	Highly Possible related	Deterioration of condition	No	No change
086	Diarrhea	2	2021-05-07	2021-05-07	Highly Possible related	Recovering	No	No change
086	Diarrhea	1	2021-05-08	2021-05-08	Highly Possible related	Recovering	No	Reduction
086	Diarrhea	1	2021-05-10	2021-05-10	Highly Possible related	Recovery	No	No change
086	Diarrhea	1	2021-05-20	2021-05-21	Highly Possible related	Recovery	No	No change
086	Diarrhea	1	2021-06-01	2021-06-05	Highly Possible related	Recovery	No	No change
086	Diarrhea	1	2021-06-10	2021-06-11	Highly Possible related	Recovery	No	No change
086	Diarrhea	1	2021-06-14	2021-06-15	Highly Possible related	Recovery	No	No change
086	Hand-foot syndrome	2	2021-06-16	2021-07-09	Possible related	Recovering	No	No change
086	Diarrhea	1	2021-06-26	2021-06-29	Highly Possible related	Recovery	No	No change
086	Diarrhea	1	2021-07-05	2021-07-08	Highly Possible related	Recovery	No	No change
086	Hand-foot syndrome	2	2021-07-12	2021-07-30	Possible related	Recovering	No	No change
086	Diarrhea	1	2021-07-18	2021-07-18	Highly Possible related	Recovery	No	No change
086	Diarrhea	1	2021-07-22	2021-07-22	Highly Possible related	Recovery	No	No change
086	Diarrhea	1	2021-07-27	2021-07-27	Highly Possible related	Recovery	No	No change
086	Diarrhea	1	2021-07-30	2021-07-30	Highly Possible related	Recovery	No	No change
086	Hand-foot syndrome	2	2021-08-03	2021-08-06	Possible related	Recovering	No	No change
086	Diarrhea	1	2021-08-13	2021-08-13	Highly Possible related	Deterioration of condition	No	No change
086	Diarrhea	2	2021-08-14	2021-08-14	Highly Possible related	Recovering	No	No change
086	Diarrhea	1	2021-08-15	2021-08-22	Highly Possible related	Recovery	No	No change
086	Hand-foot syndrome	2	2021-08-15	2021-08-25	Possible related	Recovering	No	No change
086	Diarrhea	1	2021-08-27	2021-08-27	Highly Possible related	Recovery	No	No change
086	Hyperuricemia	1	2021-09-16		Possible no relation	Recovering	No	No change
086	Hyperglycemia	1	2021-09-16		Possible no relation	Recovering	No	No change
086	Diarrhea	1	2021-09-06	2021-09-06	Highly Possible related	Recovery	No	No change
086	Diarrhea	1	2021-09-13	2021-09-15	Highly Possible related	Recovery	No	No change
086	Diarrhea	1	2021-09-21	2021-09-22	Highly Possible related	Recovery	No	No change
086	Oral mucositis	1	2021-09-27	2021-11-14	Highly Possible related	Recovery	No	No change
086	Diarrhea	1	2021-09-29	2021-09-29	Highly Possible related	Recovery	No	No change
086	Diarrhea	1	2021-10-03	2021-10-04	Highly Possible related	Recovery	No	No change
086	Diarrhea	1	2021-10-18	2021-10-19	Highly Possible related	Recovery	No	No change
086	Diarrhea	1	2021-10-23	2021-10-24	Highly Possible related	Recovery	No	No change
086	Diarrhea	1	2021-10-25	2021-10-25	Highly Possible related	Recovery	No	No change
086	Diarrhea	1	2021-10-27	2021-10-30	Highly Possible related	Recovery	No	No change
086	Diarrhea	1	2021-11-01	2021-11-03	Highly Possible related	Recovery	No	No change
086	Diarrhea	1	2021-11-20	2021-11-21	Highly Possible related	Recovery	No	No change
086	Diarrhea	1	2021-11-24	2021-11-24	Highly Possible related	Recovery	No	No change
087	Diarrhea	1	2021-01-17	2021-01-18	Highly Possible related	Recovering	No	No change
087	Fatigue	1	2021-01-17	2021-08-30	Possible related	Recovering	No	No change
087	Diarrhea	2	2021-01-19	2021-01-19	Highly Possible related	Recovering	No	No change
087	Diarrhea	1	2021-01-20	2021-03-20	Highly Possible related	Recovering	No	No change
087	Dizziness	1	2021-01-21	2021-02-02	Possible related	Recovering	No	No change
087	Nausea	1	2021-01-21	2021-02-01	Possible related	Recovering	No	No change
087	Vomiting	1	2021-01-22	2021-01-23	Possible related	Recovering	No	No change
087	Vomiting	1	2021-02-06	2021-02-06	Possible related	Recovering	No	No change
087	Diarrhea	1	2021-03-22	2021-04-12	Highly Possible related	Recovering	No	No change
087	Diarrhea	1	2021-04-15	2021-05-07	Highly Possible related	Recovering	No	No change
087	Diarrhea	1	2021-05-09	2021-08-29	Highly Possible related	Recovering	No	No change
087	Diarrhea	1	2021-09-02	2021-09-02	Highly Possible related	Recovering	No	No change
087	Fatigue	1	2021-09-02	2021-09-04	Possible related	Recovering	No	No change
087	Fatigue	1	2021-09-06	2021-09-07	Possible related	Recovering	No	No change
087	Diarrhea	1	2021-09-07	2021-09-07	Highly Possible related	Recovering	No	No change
087	Diarrhea	1	2021-09-10	2021-09-10	Highly Possible related	Recovering	No	No change
087	Fatigue	1	2021-09-10	2021-09-13	Possible related	Recovering	No	No change
087	Diarrhea	1	2021-09-15	2021-09-15	Highly Possible related	Recovering	No	No change
087	Fatigue	1	2021-09-15	2021-09-16	Possible related	Recovering	No	No change
087	Diarrhea	1	2021-09-20	2021-09-21	Highly Possible related	Recovering	No	No change
087	Fatigue	1	2021-09-21	2021-09-23	Possible related	Recovering	No	No change
087	Fatigue	1	2021-09-26	2021-09-27	Possible related	Recovering	No	No change
087	Diarrhea	1	2021-09-27	2021-09-27	Highly Possible related	Recovering	No	No change
087	Fatigue	1	2021-09-29	2021-09-30	Possible related	Recovering	No	No change
087	Diarrhea	1	2021-09-30	2021-09-30	Highly Possible related	Recovering	No	No change
087	Fatigue	1	2021-10-02	2021-10-04	Possible related	Recovering	No	No change
087	Diarrhea	1	2021-10-02	2021-10-02	Highly Possible related	Recovering	No	No change
087	Fatigue	1	2021-10-06	2021-10-06	Possible related	Recovering	No	No change
087	Fatigue	1	2021-10-08	2021-10-09	Possible related	Recovering	No	No change
087	Diarrhea	1	2021-10-08	2021-10-08	Highly Possible related	Recovering	No	No change
087	Fatigue	1	2021-10-12	2021-10-13	Possible related	Recovering	No	No change
087	Diarrhea	1	2021-10-12	2021-10-12	Highly Possible related	Recovering	No	No change
087	Fatigue	1	2021-10-16	2021-10-17	Possible related	Recovering	No	No change
087	Fatigue	1	2021-10-19	2021-10-19	Possible related	Recovering	No	No change
087	Fatigue	1	2021-10-21	2021-10-21	Possible related	Recovering	No	No change
087	Diarrhea	1	2021-10-22	2021-10-22	Highly Possible related	Recovering	No	No change
087	Fatigue	1	2021-10-27	2021-10-27	Possible related	Recovering	No	No change
087	Diarrhea	1	2021-10-27	2021-10-27	Highly Possible related	Recovering	No	No change
087	Fatigue	1	2021-11-02	2021-11-02	Possible related	Recovering	No	No change
087	Fatigue	1	2021-11-05	2021-11-06	Possible related	Recovering	No	No change
087	Diarrhea	1	2021-11-06	2021-11-06	Highly Possible related	Recovering	No	No change
087	Fatigue	1	2021-11-08	2021-11-08	Possible related	Recovering	No	No change
087	Diarrhea	1	2021-11-08	2021-11-08	Highly Possible related	Recovering	No	No change
087	Fatigue	1	2021-11-10	2021-11-12	Possible related	Recovering	No	No change
087	Fatigue	1	2021-11-14	2021-11-14	Possible related	Recovering	No	No change
087	Diarrhea	1	2021-11-16	2021-11-17	Highly Possible related	Recovering	No	No change
087	Fatigue	1	2021-11-16	2021-11-17	Possible related	Recovering	No	No change
087	Diarrhea	1	2021-11-20	2021-11-20	Highly Possible related	Recovering	No	No change
087	Diarrhea	1	2021-11-22	2021-11-22	Highly Possible related	Recovering	No	No change
087	Fatigue	1	2021-11-22	2021-11-22	Possible related	Recovering	No	No change
087	Fatigue	1	2021-11-25	2021-11-25	Possible related	Recovering	No	No change
087	Fatigue	1	2021-11-29	2021-12-01	Possible related	Recovering	No	No change
087	Fatigue	1	2021-12-05	2021-12-06	Possible related	Recovering	No	No change
087	Diarrhea	1	2021-12-06	2021-12-06	Highly Possible related	Recovering	No	No change
087	Fatigue	1	2021-12-10	2021-12-11	Possible related	Recovering	No	No change
087	Diarrhea	1	2021-12-11	2021-12-11	Highly Possible related	Recovering	No	No change
087	Fatigue	1	2021-12-13	2021-12-13	Possible related	Recovering	No	No change
087	Diarrhea	1	2021-12-15	2021-12-15	Highly Possible related	Recovering	No	No change
087	Fatigue	1	2021-12-15	2021-12-15	Possible related	Recovering	No	No change
088	Lymphocyte count decreased	1	2021-03-25		Possible no relation	Recovering	No	No change
088	Hand-foot syndrome	1	2021-01-16	2021-01-27	Possible related	Recovering	No	No change
088	Diarrhea	1	2021-01-16	2021-02-19	Highly Possible related	Recovering	No	No change
088	Headache	1	2021-01-18	2021-01-18	Possible related	Recovering	No	No change
088	Fatigue	1	2021-01-19	2021-01-19	Possible related	Recovering	No	No change
088	Headache	1	2021-01-20	2021-01-20	Possible related	Recovering	No	No change
088	Tinnitus	1	2021-01-19	2021-01-19	Possible related	Recovering	No	No change
088	Diarrhea	2	2021-02-20	2021-02-20	Highly Possible related	Recovering	No	No change
088	Fatigue	1	2021-02-21	2021-01-27	Possible related	Recovering	No	No change
088	Diarrhea	1	2021-02-21	2021-03-03	Possible related	Recovering	No	No change
088	Tinnitus	1	2021-02-24	2021-02-24	Possible related	Recovering	No	No change
088	Hand-foot syndrome	2	2021-01-28	2021-03-25	Possible related	Recovering	No	No change
088	Tinnitus	1	2021-02-01	2021-02-01	Possible related	Recovering	No	No change
088	Fatigue	1	2021-02-03	2021-03-01	Possible related	Recovering	No	No change
088	Tinnitus	1	2021-02-04	2021-02-04	Possible related	Recovering	No	No change
088	Diarrhea	2	2021-03-04	2021-03-04	Highly Possible related	Recovering	No	No change
088	Diarrhea	1	2021-03-05	2021-03-11	Highly Possible related	Recovering	No	No change
088	Diarrhea	1	2021-03-13	2021-03-24	Highly Possible related	Recovering	No	No change
088	Diarrhea	1	2021-03-26	2021-03-28	Highly Possible related	Recovering	No	No change
088	Diarrhea	1	2021-04-02	2021-04-05	Highly Possible related	Recovering	No	No change
088	Diarrhea	1	2021-07-01	2021-07-01	Highly Possible related	Recovering	No	No change
088	Diarrhea	2	2021-07-01	2021-07-01	Highly Possible related	Recovering	No	No change
088	Diarrhea	1	2021-07-03	2021-07-03	Highly Possible related	Recovery	No	No change
089	Neutrophil count decreased	1	2021-01-04		Not related	Recovering	No	No change
089	Diarrhea	1	2021-03-30	2021-03-30	Highly Possible related	Recovery	No	No change
089	Diarrhea	1	2021-04-02	2021-04-02	Highly Possible related	Recovery	No	No change
089	Diarrhea	1	2021-04-06	2021-04-06	Highly Possible related	Recovery	No	No change
089	Diarrhea	1	2021-04-09	2021-04-09	Highly Possible related	Recovery	No	No change
089	Diarrhea	1	2021-04-12	2021-04-12	Highly Possible related	Recovery	No	No change
089	Diarrhea	1	2021-04-15	2021-04-15	Highly Possible related	Recovery	No	No change
089	Diarrhea	1	2021-04-20	2021-04-20	Highly Possible related	Recovery	No	No change
089	Diarrhea	1	2021-04-23	2021-04-23	Highly Possible related	Recovery	No	No change
089	Diarrhea	1	2021-04-26	2021-04-26	Highly Possible related	Recovery	No	No change
089	Diarrhea	1	2021-04-29	2021-04-29	Highly Possible related	Recovery	No	No change
089	口轻黏膜炎	2	2021-05-03	2021-05-03	Possible related	Recovery	No	No change
090	Increased hemoglobin	1	2021-01-10	2021-04-25	Not related	Recovering	No	No change
090	Diarrhea	1	2021-01-07	2021-01-18	Highly Possible related	Recovering	No	No change
090	Fatigue	1	2021-01-11	2021-01-17	Possible related	Recovery	No	No change
090	Hand-foot syndrome	1	2021-01-15	2021-01-22	Possible related	Recovery	No	No change
090	Diarrhea	2	2021-01-19	2021-01-19	Highly Possible related	Deterioration of condition	No	No change
090	Diarrhea	1	2021-01-20	2021-01-22	Highly Possible related	Recovering	No	No change
090	Diarrhea	2	2021-01-23	2021-01-24	Highly Possible related	Recovering	No	No change
090	Diarrhea	1	2021-01-25	2021-01-26	Highly Possible related	Recovery	No	No change
090	Diarrhea	1	2021-03-01		Highly Possible related	Recovering	No	No change
091	Diarrhea	2	2021-01-21	2021-01-22	Highly Possible related	Recovering	No	No change
091	Diarrhea	2	2021-01-24	2021-01-26	Highly Possible related	Recovering	No	No change
091	Nausea	1	2021-01-24	2021-01-30	Possible related	Recovery	No	Reduction
091	Diarrhea	3	2021-01-27	2021-01-27	Highly Possible related	Recovery	No	No change
091	Diarrhea	2	2021-01-28	2021-01-30	Highly Possible related	Recovering	No	Reduction
091	Diarrhea	2	2021-02-03	2021-02-03	Highly Possible related	Recovering	No	No change
091	Increased creatinine	1	2021-05-01		Possible no relation	Recovering	No	No change
091	Neutrophil count decreased	1	2021-05-01	2021-08-06	Possible related	Recovery	No	No change
091	Anemia	1	2021-05-01		Possible no relation	Recovering	No	No change
094	White blood cell count decreased	1	2021-01-21	2021-10-14	Possible no relation	Recovering	No	No change
094	Lymphocyte count decreased	1	2021-01-21	2021-04-01	Possible no relation	Recovering	No	No change
094	Neutrophil count decreased	1	2021-04-01	2021-10-14	Possible no relation	Recovering	No	No change
094	Diarrhea	1	2020-12-25	2020-12-26	Highly Possible related	Recovering	No	No change
094	Diarrhea	2	2020-12-27	2020-12-30	Highly Possible related	Recovering	No	No change
094	Hand-foot syndrome	1	2020-12-28	2021-03-19	Possible related	Recovering	No	No change
094	Diarrhea	2	2021-01-01	2021-01-04	Highly Possible related	Recovering	No	No change
094	Diarrhea	1	2021-01-05	2021-01-23	Highly Possible related	Recovering	No	No change
094	Diarrhea	2	2021-01-24	2021-01-24	Highly Possible related	Recovering	No	No change
094	Diarrhea	1	2021-01-25	2021-01-30	Highly Possible related	Recovering	No	No change
094	Diarrhea	1	2021-02-03	2021-02-04	Highly Possible related	Recovering	No	No change
094	Diarrhea	1	2021-02-14	2021-02-14	Highly Possible related	Recovering	No	No change
094	Lymphocyte count decreased	1	2021-07-08		Possible no relation	Recovering	No	No change
094	Decreased platelet count	1	2021-07-08	2022-02-10	Possible no relation	Recovering	No	No change
094	Hyperuricemia	1	2021-07-08	2021-10-14	Possible no relation	Recovering	No	No change
094	Diarrhea	1	2021-04-10	2021-04-12	Highly Possible related	Recovering	No	No change
094	Diarrhea	2	2021-04-13	2021-04-13	Highly Possible related	Recovering	No	No change
094	Diarrhea	1	2021-04-14	2021-04-15	Highly Possible related	Recovering	No	No change
095	Lymphocyte count decreased	1	2021-01-19	2021-07-15	Not related	Recovering	No	No change
095	Increased creatinine	1	2021-04-20	2021-07-15	Possible no relation	Recovering	No	No change
095	Diarrhea	1	2021-02-02	2021-02-02	Highly Possible related	Recovery	No	No change
096	Diarrhea	1	2021-02-08	2021-02-08	Highly Possible related	Recovering	No	No change
096	Nausea	1	2021-02-08	2021-02-12	Possible related	Recovering	No	No change
096	Diarrhea	2	2021-02-09	2021-02-09	Highly Possible related	Recovering	No	No change
096	Vomiting	1	2021-02-13	2021-02-13	Possible related	Recovering	No	No change
096	Diarrhea	2	2021-02-14	2021-02-14	Highly Possible related	Recovering	No	No change
096	Diarrhea	1	2021-02-16	2021-02-16	Highly Possible related	Recovering	No	No change
096	Nausea	1	2021-02-19	2021-02-19	Possible related	Recovering	No	No change
096	Diarrhea	1	2021-02-23	2021-02-23	Highly Possible related	Recovering	No	No change
096	Diarrhea	1	2021-03-19	2021-03-19	Highly Possible related	Recovering	No	No change
096	Diarrhea	1	2021-03-25	2021-03-25	Highly Possible related	Recovering	No	No change
096	Diarrhea	2	2021-03-29	2021-03-29	Highly Possible related	Recovering	No	No change
096	Diarrhea	1	2021-03-30	2021-03-30	Highly Possible related	Recovering	No	No change
096	Diarrhea	1	2021-04-30	2021-04-30	Highly Possible related	Recovering	No	No change
096	Diarrhea	2	2021-06-06	2021-06-06	Highly Possible related	Recovering	No	No change
096	White blood cell count decreased	1	2021-07-16		Possible no relation	Recovering	No	No change
096	Anemia	1	2021-07-16		Possible no relation	Recovering	No	No change
097	Abdominal pain	1	2021-01-15	2021-01-21	Possible related	Recovering	No	No change
097	Fatigue	1	2021-01-14	2021-01-28	Possible related	Recovering	No	No change
097	Headache	1	2021-01-15	2021-01-19	Possible related	Recovering	No	No change
097	Nausea	1	2021-01-15	2021-02-19	Possible related	Recovering	No	No change
097	Vomiting	1	2021-01-15	2021-01-20	Possible related	Recovering	No	No change
097	Dizziness	1	2021-01-16	2021-01-26	Possible related	Recovering	No	No change
097	Diarrhea	1	2021-01-16	2021-01-17	Highly Possible related	Recovering	No	No change
097	Diarrhea	2	2021-01-18	2021-01-19	Highly Possible related	Recovering	No	No change
097	Diarrhea	1	2021-01-20	2021-01-20	Highly Possible related	Recovering	No	No change
097	Diarrhea	3	2021-01-22	2021-01-22	Highly Possible related	Recovering	No	No change
097	Diarrhea	1	2021-01-23	2021-01-26	Highly Possible related	Recovering	No	No change
097	Headache	1	2021-01-23	2021-01-29	Possible related	Recovering	No	No change
097	Diarrhea	2	2021-01-27	2021-01-27	Highly Possible related	Recovering	No	No change
097	Abdominal pain	1	2021-01-27	2021-01-28	Possible related	Recovering	No	No change
097	Diarrhea	1	2021-01-27	2021-01-31	Highly Possible related	Recovering	No	No change
097	Vomiting	1	2021-01-28	2021-01-28	Possible related	Recovering	No	No change
097	Vomiting	1	2021-02-02	2021-02-03	Possible related	Recovering	No	No change
097	Diarrhea	3	2021-02-03	2021-02-03	Highly Possible related	Recovering	No	No change
097	Dizziness	1	2021-02-03	2021-02-10	Possible related	Recovering	No	No change
097	Fatigue	1	2021-02-03	2021-02-03	Possible related	Recovering	No	No change
097	Diarrhea	1	2021-02-04	2021-02-07	Highly Possible related	Recovering	No	No change
097	Diarrhea	2	2021-02-08	2021-02-08	Highly Possible related	Recovering	No	No change
097	Diarrhea	1	2021-02-09	2021-02-11	Highly Possible related	Recovering	No	No change
097	Diarrhea	2	2021-02-12	2021-02-12	Highly Possible related	Recovering	No	No change
097	Diarrhea	1	2021-02-13	2021-02-15	Highly Possible related	Recovering	No	No change
097	Dizziness	1	2021-02-13	2021-02-13	Possible related	Recovering	No	No change
097	Fatigue	1	2021-02-13	2021-02-25	Possible related	Recovering	No	No change
097	Headache	1	2021-02-17	2021-02-19	Possible related	Recovering	No	No change
097	Diarrhea	1	2021-02-19	2021-02-23	Highly Possible related	Recovering	No	No change
097	Dizziness	1	2021-02-19	2021-02-19	Possible related	Recovering	No	No change
097	Diarrhea	2	2021-02-24	2021-02-24	Highly Possible related	Recovering	No	No change
097	Dizziness	1	2021-02-24	2021-02-26	Possible related	Recovering	No	No change
097	Nausea	1	2021-02-25	2021-02-26	Possible related	Recovering	No	No change
097	Headache	1	2021-02-25	2021-02-25	Possible related	Recovering	No	No change
097	Diarrhea	2	2021-02-26	2021-02-26	Highly Possible related	Recovering	No	No change
097	Diarrhea	1	2021-02-27	2021-02-27	Highly Possible related	Recovering	No	No change
097	Diarrhea	2	2021-02-28	2021-02-28	Highly Possible related	Recovering	No	No change
097	Diarrhea	1	2021-03-01	2021-03-06	Highly Possible related	Recovering	No	No change
097	Dizziness	1	2021-03-03	2021-03-04	Possible related	Recovering	No	No change
097	Headache	1	2021-03-03	2021-03-03	Possible related	Recovering	No	No change
097	Fatigue	1	2021-03-03	2021-03-12	Possible related	Recovering	No	No change
097	Nausea	1	2021-03-03	2021-03-15	Possible related	Recovering	No	No change
097	Diarrhea	2	2021-03-08	2021-03-08	Highly Possible related	Recovering	No	No change
097	Dizziness	1	2021-03-08	2021-03-08	Possible related	Recovering	No	No change
097	Vomiting	1	2021-03-06	2021-03-06	Possible related	Recovering	No	No change
097	Vomiting	1	2021-03-08	2021-03-08	Possible related	Recovering	No	No change
097	Headache	1	2021-03-08	2021-03-08	Possible related	Recovering	No	No change
097	Diarrhea	1	2021-03-09	2021-03-11	Highly Possible related	Recovering	No	No change
097	Dizziness	1	2021-03-10	2021-03-15	Possible related	Recovering	No	No change
097	Vomiting	1	2021-03-11	2021-03-11	Possible related	Recovering	No	No change
097	Headache	1	2021-03-14	2021-03-15	Possible related	Recovering	No	No change
097	Headache	1	2021-03-17	2021-03-20	Possible related	Recovering	No	No change
097	Dizziness	1	2021-03-17	2021-03-20	Possible related	Recovering	No	No change
097	Fatigue	1	2021-03-17	2021-03-20	Possible related	Recovering	No	No change
097	Increased creatinine	1	2021-03-18		Possible no relation	Recovering	No	No change
097	Neutrophil count decreased	1	2021-03-18		Possible related	Recovering	No	No change
097	Diarrhea	1	2021-03-19	2021-03-23	Highly Possible related	Recovery	No	No change
097	Nausea	1	2021-03-20	2021-03-20	Possible related	Recovery	No	No change
097	Diarrhea	2	2021-03-25	2021-03-25	Highly Possible related	Recovering	No	No change
097	Diarrhea	1	2021-04-02	2021-04-05	Highly Possible related	Recovery	No	No change
097	Nausea	1	2021-04-02	2021-04-02	Possible related	Recovery	No	No change
097	Headache	1	2021-04-02	2021-04-02	Possible related	Recovery	No	No change
097	Dizziness	1	2021-04-02	2021-04-02	Possible related	Recovery	No	No change
097	White blood cell count decreased	1	2021-06-17	2021-09-16	Possible no relation	Recovering	No	No change
097	Diarrhea	1	2021-04-07	2021-04-07	Highly Possible related	Recovery	No	No change
097	Abdominal pain	2	2021-04-07	2021-05-25	Possible no relation	Recovering	No	No change
097	Headache	1	2021-04-08	2021-04-09	Possible related	Recovery	No	No change
097	Dizziness	1	2021-04-08	2021-04-09	Possible related	Recovery	No	No change
097	Nausea	1	2021-04-08	2021-04-08	Possible related	Recovery	No	No change
097	Abdominal pain	1	2021-04-09	2021-04-18	Possible related	Recovery	No	No change
097	Diarrhea	2	2021-04-10	2021-04-10	Highly Possible related	Recovering	No	No change
097	Nausea	1	2021-04-10	2021-04-10	Possible related	Recovery	No	No change
097	Diarrhea	1	2021-04-11	2021-04-11	Highly Possible related	Recovery	No	No change
097	Vomiting	1	2021-04-11	2021-04-12	Possible related	Recovery	No	No change
097	Headache	1	2021-04-12	2021-04-12	Possible related	Recovery	No	No change
097	Dizziness	1	2021-04-12	2021-04-12	Possible related	Recovery	No	No change
097	Nausea	1	2021-04-12	2021-04-12	Possible related	Recovery	No	No change
097	Vomiting	1	2021-04-12	2021-04-12	Possible related	Recovery	No	No change
097	Diarrhea	2	2021-04-12	2021-04-13	Possible related	Recovering	No	No change
097	Hand-foot syndrome	1	2021-04-12	2021-05-25	Possible related	Recovery	No	No change
097	Abdominal pain	1	2021-04-14	2021-04-16	Possible related	Recovery	No	No change
097	Fatigue	1	2021-04-15	2021-04-19	Possible related	Recovery	No	No change
097	Headache	1	2021-04-15	2021-04-18	Possible related	Recovery	No	No change
097	Dizziness	1	2021-04-15	2021-04-19	Possible related	Recovery	No	No change
097	Nausea	1	2021-04-15	2021-04-19	Possible related	Recovery	No	No change
097	Vomiting	1	2021-04-15	2021-04-15	Possible related	Recovery	No	No change
097	Fatigue	1	2021-04-21	2021-05-07	Possible related	Recovery	No	No change
097	Dizziness	1	2021-04-21	2021-05-04	Possible related	Recovery	No	No change
097	Headache	1	2021-04-22	2021-05-04	Possible related	Recovery	No	No change
097	Nausea	1	2021-04-22	2021-04-30	Possible related	Recovery	No	No change
097	Vomiting	1	2021-04-25	2021-04-25	Possible related	Recovery	No	No change
097	Diarrhea	1	2021-05-08	2021-05-08	Highly Possible related	Recovery	No	No change
097	Diarrhea	1	2021-05-10	2021-05-10	Highly Possible related	Recovery	No	Reduction
097	Diarrhea	2	2021-05-11	2021-05-11	Highly Possible related	Recovering	No	No change
097	Fatigue	1	2021-05-11	2021-05-11	Possible related	Recovery	No	No change
097	Nausea	1	2021-05-11	2021-05-14	Possible related	Recovery	No	No change
097	Vomiting	1	2021-05-11	2021-05-13	Possible related	Recovery	No	No change
097	Diarrhea	1	2021-05-12	2021-05-13	Highly Possible related	Recovery	No	No change
097	Diarrhea	2	2021-05-14	2021-05-16	Highly Possible related	Recovering	No	No change
097	Fatigue	1	2021-05-14	2021-05-14	Possible related	Recovery	No	No change
097	Nausea	1	2021-05-14	2021-05-14	Possible related	Recovery	No	No change
097	Diarrhea	1	2021-05-17	2021-05-19	Highly Possible related	Recovery	No	No change
097	Nausea	1	2021-05-17	2021-05-22	Possible related	Recovery	No	No change
097	Vomiting	1	2021-05-17	2021-05-18	Possible related	Recovery	No	No change
097	Diarrhea	2	2021-05-20	2021-05-21	Highly Possible related	Recovering	No	No change
097	Diarrhea	1	2021-05-22	2021-05-27	Highly Possible related	Recovery	No	No change
097	Diarrhea	2	2021-05-28	2021-05-29	Highly Possible related	Recovery	No	No change
097	Diarrhea	1	2021-06-03	2021-06-04	Highly Possible related	Recovery	No	No change
097	Diarrhea	2	2021-06-06	2021-06-06	Highly Possible related	Recovering	No	No change
097	Fatigue	1	2021-06-09	2021-06-11	Possible related	Recovery	No	No change
097	Dizziness	1	2021-06-09	2021-06-11	Possible related	Recovery	No	No change
097	Nausea	1	2021-06-09	2021-06-11	Possible related	Recovery	No	No change
097	Diarrhea	1	2021-06-12	2021-06-12	Highly Possible related	Recovery	No	No change
[truncated: 1,027 more rows]
